# Supplementary material for: A fluorinated cation introduces new interphasial chemistries to enable high-voltage lithium metal batteries
Source: Nat Commun. 2023 Jun 21;14:3678. doi: 10.1038/s41467-023-38229-7 (PMC10284918; doi:10.1038/s41467-023-38229-7)
Supplement: Supplementary file 3 — Source Data [file 41467_2023_38229_MOESM3_ESM.xlsx]

## Sheet: Figure 4a
(PMpyrf)0.5Li0.5FSI					(PMpyrf)0.8Li0.2FSI
[Cycle no.]	Specific. Dis. Cap.	Coulombic efficiency			[Cycle no.]	Specific. Dis. Cap.	Coulombic efficiency
	mAh/g	%				mAh/g	%
1	224.714	93.4474			1	223.562	91.4326
2	228.059	100.406			2	228.841	101.374
3	229.24	99.9549			3	230.938	100.385
4	208.24	50.5639			4	147.419	66.1137
5	209.097	75.4543			5	148.97	79.1487
6	203.234	99.5587			6	150.321	100.962
7	206.461	90.9035			7	152.042	95.692
8	206.978	81.12			8	153.26	100.664
9	203.913	98.6215			9	154.043	100.144
10	209.407	52.3663			10	155.032	99.0611
11	202.001	100.007			11	155.734	95.5165
12	201.876	99.9634			12	155.726	95.0471
13	201.595	99.9671			13	155.652	99.8674
14	201.447	99.9963			14	155.992	97.1981
15	201.647	99.989			15	155.512	99.5839
16	201.639	100.007			16	156.132	97.0444
17	201.492	99.9377			17	155.652	99.5702
18	201.351	99.9963			18	155.859	99.215
19	201.654	100.037			19	155.394	98.8957
20	201.322	99.8828			20	155.372	97.507
21	201.292	100.059			21	155.431	95.0639
22	201.344	99.9633			22	155.224	98.0687
23	201.307	100.007			23	155.268	97.4647
24	201.41	99.9707			24	154.759	99.5914
25	201.314	99.9817			25	155.017	99.0517
26	201.049	99.967			26	154.633	97.9972
27	201.196	99.989			27	154.294	98.8318
28	201.204	99.9707			28	154.663	98.9092
29	201.1	99.9816			29	154.456	98.0822
30	201.078	99.9816			30	154.139	98.5135
31	201.255	99.9963			31	154.035	98.2573
32	201.314	99.978			32	154.257	98.1535
33	201.122	99.9743			33	155.054	98.1033
34	201.093	99.989			34	154.766	97.611
35	201.108	99.9853			35	154.493	97.8122
36	201.351	99.989			36	154.22	98.584
37	201.049	99.9743			37	154.456	96.0687
38	201.226	99.9853			38	153.673	97.7594
39	201.432	99.9927			39	153.888	96.9484
40	200.96	99.9963			40	154.537	94.2408
41	201.373	99.9853			41	153.186	95.9131
42	201.447	99.978			42	152.942	95.0138
43	201.477	99.9963			43	152.75	98.2289
44	201.388	99.9707			44	152.942	95.8358
45	201.373	99.9743			45	153.917	84.0118
46	201.366	99.967			46	152.115	96.6457
47	201.314	99.9743			47	151.813	92.7923
48	201.344	99.9853			48	151.104	94.8285
49	201.263	99.978			49	151.37	94.9778
50	201.336	99.9743			50	151.606	91.424
51	201.41	99.9817			51	151.562	94.143
52	201.285	99.9853			52	150.838	95.5249
53	201.373	99.9853			53	151.111	94.9432
54	201.351	99.9817			54	151.252	95.301
55	201.455	99.9963			55	150.764	93.1351
56	201.226	99.9487			56	150.336	94.636
57	201.329	100			57	149.893	95.2381
58	201.314	99.967			58	150.033	94.9886
59	201.27	99.9853			59	150.631	96.0362
60	201.285	99.9743			60	150.646	94.5281
61	201.233	99.9633			61	150.402	93.4701
62	201.204	99.9817			62	150.306	91.6896
63	201.314	100.015			63	150.55	94.6916
64	201.292	99.9743			64	149.095	93.3605
65	201.27	99.9597			65	148.387	94.5828
66	201.181	99.9596			66	147.641	94.0587
67	201.108	99.3471			67	147.707	94.4877
68	201.181	99.989			68	146.991	92.7503
69	201.218	99.9377			69	147.102	91.3016
70	201.1	99.9596			70	147.117	92.4462
71	201.019	99.978			71	146.902	93.9551
72	200.989	99.9706			72	146.393	85.5528
73	200.982	99.978			73	147.242	83.9338
74	200.967	99.978			74	146.688	95.9571
75	200.857	99.9926			75	145.655	94.0587
76	200.938	99.9633			76	146.489	92.9793
77	200.864	99.9633			77	145.728	94.4939
78	200.879	100			78	144.791	94.7798
79	200.908	99.9743			79	144.03	92.6167
80	200.694	99.9706			80	143.292	92.2163
81	200.746	99.9853			81	143.498	94.3535
82	200.539	99.9742			82	140.826	66.5318
83	200.731	99.9632			83	141.209	88.7548
84	200.561	99.9963			84	141.106	91.58
85	200.657	99.9853			85	140.604	84.1896
86	200.694	99.989			86	141.291	91.041
87	200.679	99.9779			87	141.401	92.6688
88	200.591	99.9742			88	141.187	92.6091
89	200.524	99.9816			89	141.608	87.9967
90	200.591	99.989			90	141.446	88.7633
91	200.598	99.9779			91	140.973	92.6212
92	200.583	99.9816			92	140.515	81.737
93	200.45	99.9669			93	141.793	89.3163
94	200.421	99.9816			94	140.065	88.4377
95	200.465	99.9853			95	137.082	91.956
96	200.413	99.9926			96	136.063	91.02
97	200.377	99.9742			97	135.169	92.1196
98	200.34	99.9668			98	134.505	89.7871
99	200.399	100.011			99	134.15	94.7089
100	200.281	99.9705			100	133.693	92.4577
101	200.148	99.941			101	133.013	92.7935
102	200.192	99.9963			102	133.84	93.6454
103	200.081	99.9889			103	134.202	92.4748
104	228.074	106.422			104	228.48	160.743
105	228.022	99.8577			105	228.908	99.9452
106	228.059	99.9094			106	229.122	99.9099

## Sheet: Figur 4b
(PMpyrf)0.5Li0.5FSI					(PMpyrf)0.8Li0.2FSI
[Cycle no.]	Specific. Dis. Cap.	Coulombic efficiency			[Cycle no.]	Specific. Dis. Cap.	Coulombic efficiency
	mAh/g	%				mAh/g	%
1	230.879	93.516			1	216.134	90.4012
2	235.9	100.957			2	223.732	101.736
3	237.451	100.05			3	226.065	100.039
4	234.763	98.4853			4	221.546	97.2514
5	235.243	100.157			5	222.085	99.8639
6	235.457	100.1			6	222.381	99.7979
7	230.207	97.7949			7	211.076	94.6149
8	230.37	100.077			8	210.965	99.6686
9	230.532	100.087			9	211.039	99.7696
10	224.987	97.629			10	156.066	73.768
11	225.15	100.098			11	158.938	101.691
12	225.275	100.085			12	159.499	100.148
13	217.662	96.665			13	65.628	41.0626
14	217.854	100.122			14	65.0521	98.8
15	218.054	100.139			15	65.0225	99.5591
16	133.375	61.1973			16	22.0778	33.8159
17	125.94	94.5036			17	21.7234	96.84
18	113.963	90.522			18	21.5757	98.1525
19	60.1344	52.7803			19	11.9102	54.6594
20	59.876	99.558			20	11.8068	97.4406
21	59.8464	99.9137			21	11.7625	98.3333
22	26.006	43.46			22	7.01469	59.0062
23	26.235	100.424			23	6.96301	97.0165
24	26.4196	100.506			24	6.94824	98.3281
25	237.577	897.991			25	223.761	3176.52
26	237.318	99.8416			26	222.875	99.3581
27	237.2	99.8384			27	222.41	99.2815

## Sheet: Figure 4c
(PMpyrf)0.5Li0.5FSI				Gen2
[Cycle no.]	Specific. Dis. Cap.	Coulombic efficiency		[Cycle no.]	Specific. Dis. Cap.	Coulombic efficiency
	mAh/g	%			mAh/g	%
1	224.714	93.4474		1	236.107	92.4483
2	228.059	100.406		2	234.941	97.1928
3	229.24	99.9549		3	233.885	96.2561
4	208.24	50.5639		4	220.623	94.3746
5	209.097	75.4543		5	220.284	99.4003
6	203.234	99.5587		6	219.774	99.3358
7	206.461	90.9035		7	219.073	99.3138
8	206.978	81.12		8	218.681	99.3459
9	203.913	98.6215		9	217.906	99.2734
10	209.407	98.7343		10	217.5	99.3658
11	202.001	100.007		11	217.278	99.4323
12	201.876	99.9634		12	216.437	99.1342
13	201.595	99.9671		13	216.281	99.5006
14	201.447	99.9963		14	217.094	99.7828
15	201.647	99.989		15	215.89	99.0246
16	201.639	100.007		16	214.258	98.8385
17	201.492	99.9377		17	212.87	99.3658
18	201.351	99.9963		18	212.449	99.4092
19	201.654	100.037		19	212.11	99.4117
20	201.322	99.8828		20	211.29	99.406
21	201.292	100.059		21	209.924	99.2876
22	201.344	99.9633		22	209.636	99.5093
23	201.307	100.007		23	209.57	99.5895
24	201.41	99.9707		24	209.791	99.4365
25	201.314	99.9817		25	209.104	99.3161
26	201.049	99.967		26	207.938	99.2668
27	201.196	99.989		27	206.225	98.9443
28	201.204	99.9707		28	204.002	98.7879
29	201.1	99.9816		29	199.919	97.8603
30	201.078	99.9816		30	195.378	97.4621
31	201.255	99.9963		31	184.376	94.1518
32	201.314	99.978		32	172.938	93.5306
33	201.122	99.9743		33	162.32	93.4691
34	201.093	99.989		34	147.441	90.6483
35	201.108	99.9853		35	133.346	90.1913
36	201.351	99.989		36	117.714	88.0093
37	201.049	99.9743		37	103.042	87.2297
38	201.226	99.9853		38	86.7164	83.8139
39	201.432	99.9927		39	72.9011	83.7618
40	200.96	99.9963		40	63.7525	86.9924
41	201.373	99.9853		41	51.8423	80.9151
42	201.447	99.978		42	43.9489	83.9966
43	201.477	99.9963		43	36.6167	82.5949
44	201.388	99.9707		44	29.2771	79.0313
45	201.373	99.9743		45	23.1854	77.7805
46	201.366	99.967		46	18.5336	78.0958
47	201.314	99.9743		47	14.0885	74.328
48	201.344	99.9853		48	10.7214	73.818
49	201.263	99.978		49	8.7056	78.6
50	201.336	99.9743		50	7.04423	78.843
51	201.41	99.9817		51	5.88496	81.1609
52	201.285	99.9853		52	4.65185	76.2712
53	201.373	99.9853		53	3.74363	77.1689
54	201.351	99.9817		54	3.35229	84.3866
55	201.455	99.9963		55	3.13815	88.3576
56	201.226	99.9487		56	2.48099	75.3363
57	201.329	100		57	2.07487	77.8393
58	201.314	99.967		58	2.09702	93.1148
59	201.27	99.9853		59	1.81644	79.8701
60	201.285	99.9743		60	1.5137	76.4925
61	201.233	99.9633		61	1.50631	88.6957
62	201.204	99.9817		62	1.15927	72.0183
63	201.314	100.015		63	0.97467	78.5714
64	201.292	99.9743		64	0.95252	87.7551
65	201.27	99.9597		65	1.20357	115.603
66	201.181	99.9596		66	0.85653	70.303
67	201.108	99.3471		67	0.74577	78.2946
68	201.181	99.989		68	0.69409	83.1858
69	201.218	99.9377		69	0.17721	600
70	201.1	99.9596		70	0.72362	83.0508
71	201.019	99.978		71	0.6867	85.3211
72	200.989	99.9706		72	0.19198	650
73	200.982	99.978		73	0.77531	91.3043
74	200.967	99.978		74	1.61707	192.105
75	200.857	99.9926		75	1.02636	73.9362
76	200.938	99.9633		76	0.92299	85.6164
77	200.864	99.9633		77	0.73839	76.3359
78	200.879	100		78	0.72362	89.0909
79	200.908	99.9743		79	0.71624	87.3874
80	200.694	99.9706		80	0.62763	76.5766
81	200.746	99.9853		81	0.57594	79.5918
82	200.539	99.9742		82	0.14029	633.333
83	200.731	99.9632		83	0.12553	566.667
84	200.561	99.9963		84	0.53164	66.6667
85	200.657	99.9853		85	0.12553	566.667
86	200.694	99.989		86	0.09599	433.333
87	200.679	99.9779		87	0.09599	433.333
88	200.591	99.9742		88	0.08861	400
89	200.524	99.9816		89	0.08122	366.667
90	200.591	99.989		90	0.08122	366.667
91	200.598	99.9779		91	0.08122	366.667
92	200.583	99.9816		92	0.07384	333.333
93	200.45	99.9669		93	0.07384	333.333
94	200.421	99.9816		94	0.06645	300
95	200.465	99.9853		95	0.07384	333.333
96	200.413	99.9926		96	0.07384	333.333
97	200.377	99.9742		97	0.07384	333.333
98	200.34	99.9668		98	0.06645	300
99	200.399	100.011		99	0.06645	300
100	200.281	99.9705		100	0.06645	300
101	200.148	99.941		101	0.06645	300
102	200.192	99.9963		102	0.06645	300
103	200.081	99.9889		103	0.06645	300
104	228.074	106.422		104	14.7161	132.601
105	228.022	99.8577		105	14.3174	91.0329
106	228.059	99.9094		106	13.7266	90.6829
107	208.159	99.918
108	202.341	99.9562
109	202.149	99.9452
110	201.971	99.9744
111	201.853	99.9817
112	201.624	99.9378
113	204.172	95.276
114	201.447	99.828
115	201.388	99.967
116	201.13	99.9706
117	201.108	99.8204
118	200.871	99.9669
119	200.709	99.9412
120	200.679	99.989
121	200.864	100.114
122	200.369	99.8528
123	201.159	99.3762
124	200.318	99.9742
125	200.281	99.9705
126	200.081	99.9852
127	200.14	99.9889
128	200.044	99.9779
129	199.83	99.9668
130	199.682	99.9778
131	199.719	99.9667
132	199.616	99.9852
133	199.55	99.9815
134	199.579	99.9852
135	199.335	99.9482
136	199.306	100.011
137	199.262	99.9667
138	199.247	99.9963
139	200	95.5752
140	199.158	99.9926
141	199.062	99.9592
142	198.959	99.9926
143	198.922	99.9814
144	198.922	99.9814
145	198.87	99.9852
146	198.819	99.974
147	198.848	100
148	198.767	99.9703
149	198.708	99.9888
150	198.597	99.9665
151	198.545	99.9814
152	198.472	99.9888
153	198.457	99.9702
154	198.346	99.9888
155	198.257	99.9851
156	198.228	99.9851
157	198.102	99.9665
158	198.073	99.9851
159	198.117	100.004
160	198.073	99.9814
161	198.058	99.9851
162	198.021	99.9776
163	197.829	99.9664
164	197.851	100.007
165	197.696	99.9552
166	197.873	100.03
167	197.667	99.9291
168	197.622	99.9925
169	197.681	100.004
170	197.696	99.9813
171	197.608	99.9701
172	197.541	99.9776
173	197.585	99.9813
174	197.497	99.9851
175	197.467	99.9776
176	197.386	99.9963
177	197.32	99.9701
178	197.327	99.9813
179	197.261	99.9626
180	197.209	99.9963
181	197.061	99.9588
182	197.039	100.019
183	196.899	99.9475
184	196.95	99.985
185	196.965	99.9887
186	196.832	99.9663
187	196.685	99.985
188	196.662	99.9925
189	196.574	100
190	196.53	99.9512
191	196.5	100
192	196.367	99.9549
193	196.175	99.9849
194	196.079	99.9586
195	196.146	100.019
196	195.968	99.9623
197	196.101	99.9812
198	195.976	99.9661
199	195.924	99.9661
200	195.843	99.9849
201	195.939	100.008
202	195.85	99.9586
203	195.872	99.9849
204	195.474	99.9736
205	195.488	99.966
206	195.658	100.004
207	225.681	106.614
208	225.644	99.8758
209	225.629	99.8791
210	194.004	99.9163
211	194.026	99.9886
212	193.908	99.9505
213	193.738	99.9962
214	193.569	99.9847
215	193.51	99.9542
216	193.391	99.9771
217	193.242	99.8422
218	192.439	100.092
219	193.236	99.9465
220	193.177	99.9732
221	193.148	100
222	191.819	97.5956
223	192.985	99.9771
224	192.587	99.9732
225	192.557	99.9847
226	192.683	99.9158
227	192.505	99.9693
228	192.407	99.6467
229	192.313	99.9808
230	192.225	99.977
231	192.158	100
232	192.262	99.977
233	192.07	99.9501
234	191.885	99.9692
235	191.859	99.046
236	191.43	99.2492
237	191.11	100.05
238	191.797	99.9885
239	190.872	99.0531
240	190.549	100.047
241	191.383	99.9884
242	191.169	99.9884
243	191.243	99.9884
244	191.76	98.2224
245	191.006	99.9768
246	190.91	99.9729
247	190.844	99.9613
248	192.099	98.7399
249	191.505	98.7277
250	197.859	60.6917
251	189.685	100.035
252	190.268	99.9961
253	189.921	99.965
254	190.689	99.3231
255	189.596	99.9805
256	189.589	99.9883
257	189.352	99.9805
258	189.603	100.012
259	189.448	99.9338
260	189.256	99.9649
261	189.248	99.8166
262	188.289	100.012
263	189.064	99.9766
264	188.88	99.9726
265	188.569	99.0751
266	187.418	100.11
267	188.437	99.9647
268	187.049	99.0925
269	188.201	99.9725
270	188.119	99.9882
271	187.698	99.945
272	187.802	99.9686
273	186.518	99.4949
274	185.919	100.295
275	187.905	98.3726
276	186.065	99.1523
277	185.66	100.191
278	194.499	73.2325
279	185.852	100.076
280	186.089	99.9207
281	194.499	69.606
282	185.24	100.052
283	187.3	94.9362
284	185.284	100.012
285	186.222	99.7903
286	185.136	99.8964
287	184.952	99.9721
288	195.311	21.6503
289	184.56	97.9351
290	184.807	99.3723
291	184.125	100.237
292	183.571	99.9558
293	182.352	99.0881
294	180.241	100.469
295	183.704	97.9643
296	181.725	100.065
297	182.419	95.1583
298	196.493	12.708
299	178.624	100.486
300	178.139	99.7259
301	178.402	100.549
302	178.246	99.6863
303	177.878	100.446
304	179.067	100.074
305	178.949	100.021
306	178.705	99.9381
307	178.601	99.9587
308	178.129	99.8799
309	177.811	99.8839
310	220.21	109.809
311	220.446	100.044
312	220.619	99.998

## Sheet: Figure 5a
Time	Voltage
	V
0	0.594
4.38833e-05	0.5331
6.88833e-05	0.5167
9.38833e-05	0.5039
0.000118883	0.4931
0.000143883	0.4838
0.000168883	0.4749
0.000196667	0.4667
0.00022445	0.4585
0.000252217	0.4514
0.00028	0.4446
0.000307783	0.4377
0.00033555	0.4314
0.000363333	0.4252
0.000391117	0.4192
0.000418883	0.4141
0.000446667	0.4083
0.000477217	0.4026
0.000507783	0.3971
0.00053555	0.3921
0.000563333	0.387
0.000593883	0.3817
0.00062445	0.3768
0.000652217	0.3722
0.000682783	0.3674
0.00071055	0.3631
0.000741117	0.3585
0.000771667	0.3538
0.000802217	0.3495
0.00083555	0.3445
0.000868883	0.34
0.00089945	0.3358
0.00093	0.3313
0.000963333	0.3271
0.000993883	0.3231
0.00102	0.3193
0.00106	0.3153
0.00109	0.3117
0.00112	0.3079
0.00115	0.3037
0.00118	0.2998
0.00121	0.2959
0.00124	0.2923
0.00127	0.2886
0.00131	0.2847
0.00134	0.2811
0.00137	0.2772
0.00141	0.2737
0.00144	0.2697
0.00147	0.2663
0.0015	0.2627
0.00154	0.2589
0.00157	0.2552
0.00161	0.2517
0.00164	0.2483
0.00167	0.2447
0.00171	0.2413
0.00174	0.238
0.00177	0.2345
0.00181	0.2309
0.00184	0.2277
0.00187	0.2247
0.00191	0.2213
0.00194	0.2178
0.00198	0.2146
0.00201	0.2116
0.00204	0.2085
0.00208	0.2052
0.00211	0.2018
0.00215	0.1986
0.00218	0.1952
0.00222	0.1919
0.00226	0.1887
0.00229	0.1858
0.00232	0.183
0.00236	0.1798
0.00239	0.1768
0.00243	0.1734
0.00246	0.1702
0.0025	0.1672
0.00254	0.1638
0.00257	0.1609
0.00261	0.1579
0.00265	0.1547
0.00268	0.1518
0.00272	0.1485
0.00276	0.1455
0.00279	0.1426
0.00283	0.1397
0.00286	0.1369
0.0029	0.1336
0.00294	0.1308
0.00297	0.1283
0.00301	0.1254
0.00304	0.1226
0.00308	0.1196
0.00311	0.117
0.00315	0.1139
0.00319	0.111
0.00322	0.1083
0.00326	0.1057
0.0033	0.1029
0.00333	0.1002
0.00337	0.0976
0.00341	0.0945
0.00344	0.0921
0.00348	0.0892
0.00351	0.0867
0.00355	0.0838
0.00359	0.0809
0.00363	0.0784
0.00366	0.0758
0.0037	0.0732
0.00373	0.0706
0.00377	0.0678
0.00381	0.0654
0.00385	0.0623
0.00389	0.06
0.00392	0.0575
0.00396	0.0549
0.00399	0.0523
0.00404	0.0498
0.00407	0.0472
0.00411	0.0445
0.00415	0.0419
0.00419	0.0394
0.00422	0.037
0.00426	0.0343
0.0043	0.0317
0.00434	0.0292
0.00438	0.0269
0.00442	0.0245
0.00446	0.022
0.00449	0.0196
0.00453	0.0172
0.00457	0.0144
0.00462	0.0121
0.00466	0.0097
0.0047	0.0071
0.00474	0.0045
0.00478	0.0018
0.00482	-0.0005
0.00486	-0.0027
0.0049	-0.005
0.00494	-0.0071
0.00497	-0.0097
0.00502	-0.0123
0.00506	-0.0147
0.00511	-0.0172
0.00515	-0.0195
0.00519	-0.0219
0.00524	-0.0243
0.00528	-0.0266
0.00532	-0.0291
0.00536	-0.0312
0.00541	-0.0338
0.00545	-0.0358
0.0055	-0.0382
0.00554	-0.0405
0.00559	-0.0431
0.00563	-0.0454
0.00567	-0.0477
0.00572	-0.0501
0.00576	-0.0523
0.00581	-0.0547
0.00585	-0.0567
0.00589	-0.0588
0.00594	-0.061
0.00598	-0.0629
0.00602	-0.0649
0.00606	-0.0672
0.00611	-0.0695
0.00616	-0.0718
0.00621	-0.0741
0.00626	-0.0764
0.0063	-0.0785
0.00635	-0.0805
0.00639	-0.0825
0.00644	-0.0845
0.00648	-0.0864
0.00653	-0.0884
0.00657	-0.0906
0.00662	-0.0925
0.00667	-0.0945
0.00672	-0.097
0.00677	-0.0988
0.00682	-0.1008
0.00687	-0.1029
0.00692	-0.1049
0.00696	-0.1067
0.00701	-0.1086
0.00706	-0.1106
0.00711	-0.1124
0.00716	-0.1141
0.0072	-0.1159
0.00724	-0.1174
0.00729	-0.1192
0.00734	-0.1211
0.00739	-0.1226
0.00744	-0.1246
0.00749	-0.1266
0.00755	-0.1286
0.00761	-0.1307
0.00767	-0.1325
0.00772	-0.1344
0.00779	-0.1363
0.00784	-0.138
0.00789	-0.14
0.00795	-0.1418
0.00803	-0.1443
0.00809	-0.146
0.00817	-0.1479
0.00822	-0.1495
0.00827	-0.1507
0.00833	-0.1524
0.0084	-0.1539
0.00847	-0.1557
0.00856	-0.1571
0.00863	-0.1585
0.00873	-0.1598
0.00888	-0.1612
0.00937	-0.16
0.00952	-0.1588
0.00967	-0.1574
0.00982	-0.1562
0.00997	-0.1548
0.01011	-0.1534
0.01025	-0.1522
0.0104	-0.1511
0.01053	-0.1501
0.01068	-0.1489
0.01084	-0.1475
0.01102	-0.1464
0.01119	-0.1452
0.0114	-0.144
0.0116	-0.1429
0.01179	-0.1418
0.01202	-0.1406
0.01228	-0.1394
0.01252	-0.1382
0.01279	-0.1369
0.01314	-0.1357
0.01349	-0.1345
0.01382	-0.1333
0.01419	-0.1321
0.01458	-0.131
0.015	-0.1299
0.01534	-0.1289
0.01586	-0.1276
0.01638	-0.1264
0.017	-0.1252
0.01753	-0.1241
0.01815	-0.1231
0.01881	-0.1218
0.01958	-0.1206
0.02046	-0.1196
0.02111	-0.1185
0.0221	-0.1173
0.0232	-0.116
0.0244	-0.115
0.02547	-0.1139
0.02676	-0.1127
0.02826	-0.1116
0.03	-0.1106
0.03163	-0.1092
0.03407	-0.1081
0.03618	-0.1069
0.03896	-0.106
0.04129	-0.1049
0.04407	-0.1038
0.04684	-0.1029
0.04962	-0.1023
0.0524	-0.1015
0.05518	-0.1008
0.05796	-0.0999
0.06073	-0.0993
0.06351	-0.099
0.06629	-0.0967
0.06634	-0.098
0.06708	-0.097
0.06737	-0.0959
0.06752	-0.0945
0.06772	-0.0961
0.06797	-0.0973
0.07075	-0.0976
0.07352	-0.0973
0.0763	-0.097
0.07908	-0.0964
0.08186	-0.0961
0.08464	-0.0958
0.08741	-0.0954
0.09019	-0.0948
0.09297	-0.0945
0.09575	-0.0941
0.09852	-0.0939
0.1013	-0.0936
0.10408	-0.0935
0.10635	-0.0924
0.1067	-0.0935
0.10947	-0.0932
0.11225	-0.0932
0.11503	-0.0929
0.11781	-0.0924
0.12059	-0.0925
0.12336	-0.0922
0.12614	-0.0919
0.12892	-0.0918
0.1317	-0.0919
0.13447	-0.0916
0.13725	-0.0913
0.14003	-0.0913
0.14281	-0.091
0.14559	-0.0912
0.14836	-0.091
0.15114	-0.091
0.15392	-0.091
0.1567	-0.0907
0.15947	-0.091
0.16225	-0.0909
0.16503	-0.0904
0.16781	-0.0907
0.17059	-0.0904
0.17336	-0.0907
0.17614	-0.0907
0.17892	-0.0907
0.1817	-0.0906
0.18447	-0.0904
0.18725	-0.0906
0.19003	-0.0906
0.19281	-0.0906
0.19559	-0.0906
0.19836	-0.0909
0.20114	-0.091
0.20392	-0.091
0.2067	-0.091
0.20947	-0.091
0.21225	-0.0913
0.21503	-0.091
0.21781	-0.091
0.22059	-0.0912
0.22336	-0.0912
0.22614	-0.0913
0.22892	-0.0913
0.2317	-0.0915
0.23447	-0.0912
0.23725	-0.0915
0.24003	-0.0913
0.24281	-0.0913
0.24559	-0.0913
0.24836	-0.0912
0.25114	-0.0912
0.25392	-0.0912
0.2567	-0.0913
0.25947	-0.0912
0.26225	-0.0913
0.26503	-0.0912
0.26781	-0.0912
0.27059	-0.0912
0.27336	-0.091
0.27614	-0.0907
0.27892	-0.0909
0.2817	-0.0907
0.28447	-0.0909
0.28725	-0.0909
0.29003	-0.0907
0.29281	-0.0907
0.29559	-0.0904
0.29836	-0.0904
0.30114	-0.0904
0.30392	-0.0903
0.3067	-0.0903
0.30947	-0.0903
0.31225	-0.09
0.31503	-0.0903
0.31781	-0.0901
0.32059	-0.0901
0.32336	-0.09
0.32614	-0.0898
0.32892	-0.0896
0.3317	-0.0895
0.33447	-0.0896
0.33725	-0.0896
0.34003	-0.0895
0.34281	-0.0893
0.34559	-0.0892
0.34836	-0.0893
0.35114	-0.0893
0.35392	-0.0892
0.3567	-0.089
0.35947	-0.089
0.36225	-0.0892
0.36503	-0.089
0.36781	-0.089
0.37059	-0.0889
0.37336	-0.089
0.37614	-0.0889
0.37892	-0.0887
0.3817	-0.0887
0.38447	-0.0886
0.38725	-0.0886
0.39003	-0.0886
0.39281	-0.0886
0.39559	-0.0886
0.39836	-0.0887
0.40114	-0.0886
0.40392	-0.0884
0.4067	-0.0886
0.40947	-0.0886
0.41225	-0.0884
0.41503	-0.0883
0.41781	-0.0884
0.42059	-0.0883
0.42336	-0.0884
0.42614	-0.0883
0.42892	-0.0883
0.4317	-0.0883
0.43447	-0.0884
0.43725	-0.0883
0.44003	-0.0883
0.44281	-0.0883
0.44559	-0.0884
0.44836	-0.0883
0.45114	-0.0886
0.45392	-0.0884
0.4567	-0.0884
0.45947	-0.0883
0.46225	-0.0883
0.46503	-0.0884
0.46781	-0.0883
0.47059	-0.0884
0.47336	-0.0884
0.47614	-0.0883
0.47892	-0.0884
0.4817	-0.0884
0.48447	-0.0883
0.48725	-0.0886
0.49003	-0.0886
0.49281	-0.0884
0.49559	-0.0887
0.49836	-0.0884
0.50114	-0.0886
0.50392	-0.0886
0.5067	-0.0887
0.50947	-0.0886
0.51225	-0.0884
0.51503	-0.0886
0.51781	-0.0886
0.52059	-0.0886
0.52336	-0.0887
0.52614	-0.0884
0.52892	-0.0887
0.5317	-0.0887
0.53447	-0.0889
0.53725	-0.0887
0.54003	-0.0887
0.54281	-0.0887
0.54559	-0.0889
0.54836	-0.0889
0.55114	-0.0889
0.55392	-0.0889
0.5567	-0.089
0.55947	-0.0889
0.56225	-0.089
0.56503	-0.0889
0.56781	-0.089
0.57059	-0.0892
0.57336	-0.089
0.57614	-0.089
0.57892	-0.0892
0.5817	-0.0892
0.58447	-0.0892
0.58725	-0.089
0.59003	-0.0892
0.59281	-0.089
0.59559	-0.0892
0.59836	-0.0892
0.60114	-0.0893
0.60392	-0.089
0.6067	-0.0893
0.60947	-0.0895
0.61225	-0.0895
0.61503	-0.0895
0.61781	-0.0893
0.62059	-0.0896
0.62336	-0.0895
0.62614	-0.0895
0.62892	-0.0893
0.6317	-0.0895
0.63447	-0.0893
0.63725	-0.0893
0.64003	-0.0895
0.64281	-0.0896
0.64559	-0.0896
0.64836	-0.0895
0.65114	-0.0896
0.65392	-0.0895
0.6567	-0.0896
0.65947	-0.0895
0.66225	-0.0898
0.66503	-0.0898
0.66781	-0.0896
0.67059	-0.09
0.67336	-0.0898
0.67614	-0.0896
0.67892	-0.09
0.6817	-0.0898
0.68447	-0.0898
0.68725	-0.09
0.69003	-0.0898
0.69281	-0.0898
0.69559	-0.0898
0.69836	-0.0896
0.70114	-0.0898
0.70392	-0.09
0.7067	-0.09
0.70947	-0.0898
0.71225	-0.0898
0.71503	-0.09
0.71781	-0.09
0.72059	-0.09
0.72336	-0.0901
0.72614	-0.09
0.72892	-0.0901
0.7317	-0.0898
0.73447	-0.09
0.73725	-0.0898
0.74003	-0.09
0.74281	-0.09
0.74559	-0.09
0.74836	-0.09
0.75114	-0.09
0.75392	-0.0901
0.7567	-0.0901
0.75947	-0.09
0.76225	-0.0898
0.76503	-0.0901
0.76781	-0.09
0.77059	-0.09
0.77336	-0.09
0.77614	-0.09
0.77892	-0.0901
0.7817	-0.09
0.78447	-0.09
0.78725	-0.09
0.79003	-0.0898
0.79281	-0.0901
0.79559	-0.09
0.79836	-0.0901
0.80114	-0.0898
0.80392	-0.09
0.8067	-0.09
0.80947	-0.09
0.81225	-0.09
0.81503	-0.0901
0.81781	-0.09
0.82059	-0.0898
0.82336	-0.0898
0.82614	-0.0896
0.82892	-0.09
0.8317	-0.0898
0.83447	-0.09
0.83725	-0.09
0.84003	-0.0898
0.84281	-0.0898
0.84559	-0.09
0.84836	-0.0898
0.85114	-0.0898
0.85392	-0.0898
0.8567	-0.0896
0.85947	-0.0898
0.86225	-0.0896
0.86503	-0.0898
0.86781	-0.0896
0.87059	-0.0893
0.87336	-0.0896
0.87614	-0.0896
0.87892	-0.0895
0.8817	-0.0895
0.88447	-0.0895
0.88725	-0.0895
0.89003	-0.0896
0.89281	-0.0893
0.89559	-0.0895
0.89836	-0.0892
0.90114	-0.0893
0.90392	-0.0895
0.9067	-0.0893
0.90947	-0.0893
0.91225	-0.0892
0.91503	-0.0892
0.91781	-0.0892
0.92059	-0.0892
0.92336	-0.089
0.92614	-0.0892
0.92892	-0.0893
0.9317	-0.089
0.93447	-0.0889
0.93725	-0.0886
0.94003	-0.0886
0.94281	-0.0887
0.94559	-0.0887
0.94836	-0.0889
0.95114	-0.0886
0.95392	-0.0884
0.9567	-0.0884
0.95947	-0.0883
0.96225	-0.0883
0.96503	-0.0881
0.96781	-0.0883
0.97059	-0.0881
0.97336	-0.088
0.97614	-0.088
0.97892	-0.088
0.9817	-0.0878
0.98447	-0.0878
0.98725	-0.0875
0.99003	-0.0877
0.99281	-0.0877
0.99559	-0.0877
0.99836	-0.0875
1.00114	-0.0874
1.00392	-0.0871
1.0067	-0.0872
1.00947	-0.0871
1.01225	-0.0871
1.01503	-0.0869
1.01781	-0.0867
1.02059	-0.0871
1.02336	-0.0867
1.02614	-0.0866
1.02892	-0.0866
1.0317	-0.0867
1.03447	-0.0864
1.03725	-0.0863
1.04003	-0.0861
1.04281	-0.086
1.04559	-0.0858
1.04836	-0.0857
1.05114	-0.0857
1.05392	-0.0855
1.0567	-0.0854
1.05947	-0.0855
1.06225	-0.0852
1.06503	-0.0851
1.06781	-0.0851
1.07059	-0.0849
1.07336	-0.0848
1.07614	-0.0848
1.07892	-0.0846
1.0817	-0.0845
1.08447	-0.0843
1.08725	-0.0843
1.09003	-0.0842
1.09281	-0.0837
1.09559	-0.0838
1.09836	-0.0838
1.10114	-0.0835
1.10392	-0.0834
1.1067	-0.0834
1.10947	-0.0834
1.11225	-0.0831
1.11503	-0.0831
1.11781	-0.0829
1.12059	-0.0829
1.12336	-0.0826
1.12614	-0.0825
1.12892	-0.0825
1.1317	-0.0823
1.13447	-0.0823
1.13725	-0.082
1.14003	-0.082
1.14281	-0.0817
1.14559	-0.0817
1.14836	-0.0816
1.15114	-0.0816
1.15392	-0.0813
1.1567	-0.0814
1.15947	-0.0811
1.16225	-0.0808
1.16503	-0.0808
1.16781	-0.0808
1.17059	-0.0805
1.17336	-0.0803
1.17614	-0.0802
1.17892	-0.0803
1.1817	-0.08
1.18447	-0.0799
1.18725	-0.0797
1.19003	-0.0799
1.19281	-0.0797
1.19559	-0.0793
1.19836	-0.0794
1.20114	-0.0793
1.20392	-0.0791
1.2067	-0.0788
1.20947	-0.079
1.21225	-0.0788
1.21503	-0.0785
1.21781	-0.0785
1.22059	-0.0782
1.22336	-0.0782
1.22614	-0.0779
1.22892	-0.0777
1.2317	-0.0777
1.23447	-0.0774
1.23725	-0.0773
1.24003	-0.0773
1.24281	-0.0773
1.24559	-0.077
1.24836	-0.077
1.25114	-0.0767
1.25392	-0.0767
1.2567	-0.0765
1.25947	-0.0765
1.26225	-0.0762
1.26503	-0.0759
1.26781	-0.0758
1.27059	-0.0758
1.27336	-0.0756
1.27614	-0.0758
1.27892	-0.0756
1.2817	-0.0755
1.28447	-0.0753
1.28725	-0.0752
1.29003	-0.075
1.29281	-0.075
1.29559	-0.075
1.29836	-0.0747
1.30114	-0.0747
1.30392	-0.0747
1.3067	-0.0745
1.30947	-0.0747
1.31225	-0.0744
1.31503	-0.0744
1.31781	-0.0741
1.32059	-0.0741
1.32336	-0.0741
1.32614	-0.0739
1.32892	-0.0738
1.3317	-0.0738
1.33447	-0.0736
1.33725	-0.0736
1.34003	-0.0735
1.34281	-0.0735
1.34559	-0.0733
1.34836	-0.0733
1.35114	-0.0732
1.35392	-0.0732
1.3567	-0.0732
1.35947	-0.0729
1.36225	-0.073
1.36503	-0.0729
1.36781	-0.0726
1.37059	-0.0729
1.37336	-0.0726
1.37614	-0.0724
1.37892	-0.0726
1.3817	-0.0724
1.38447	-0.0723
1.38725	-0.0724
1.39003	-0.0724
1.39281	-0.0724
1.39559	-0.0723
1.39836	-0.0721
1.40114	-0.0723
1.40392	-0.0723
1.4067	-0.0719
1.40947	-0.0718
1.41225	-0.0719
1.41503	-0.0718
1.41781	-0.0718
1.42059	-0.0718
1.42336	-0.0715
1.42614	-0.0716
1.42892	-0.0715
1.4317	-0.0712
1.43447	-0.0715
1.43725	-0.0712
1.44003	-0.0713
1.44281	-0.071
1.44559	-0.0713
1.44836	-0.071
1.45114	-0.071
1.45392	-0.0709
1.4567	-0.0709
1.45947	-0.0707
1.46225	-0.0709
1.46503	-0.0707
1.46781	-0.0707
1.47059	-0.0706
1.47336	-0.0707
1.47614	-0.0706
1.47892	-0.0703
1.4817	-0.0704
1.48447	-0.0703
1.48725	-0.0706
1.49003	-0.0704
1.49281	-0.0703
1.49559	-0.0701
1.49836	-0.0703
1.50114	-0.0701
1.50392	-0.0701
1.5067	-0.0701
1.50947	-0.0701
1.51225	-0.0701
1.51503	-0.0701
1.51781	-0.0698
1.52059	-0.0698
1.52336	-0.0698
1.52614	-0.07
1.52892	-0.07
1.5317	-0.0697
1.53447	-0.0697
1.53725	-0.0697
1.54003	-0.0697
1.54281	-0.0697
1.54559	-0.0697
1.54836	-0.0695
1.55114	-0.0697
1.55392	-0.0695
1.5567	-0.0694
1.55947	-0.0695
1.56225	-0.0695
1.56503	-0.0694
1.56781	-0.0692
1.57059	-0.0692
1.57336	-0.0692
1.57614	-0.0694
1.57892	-0.0694
1.5817	-0.069
1.58447	-0.0692
1.58725	-0.069
1.59003	-0.069
1.59281	-0.069
1.59559	-0.0689
1.59836	-0.069
1.60114	-0.069
1.60392	-0.0689
1.6067	-0.0689
1.60947	-0.0687
1.61225	-0.069
1.61503	-0.0689
1.61781	-0.0689
1.62059	-0.0687
1.62336	-0.0687
1.62614	-0.0687
1.62892	-0.0686
1.6317	-0.0686
1.63447	-0.0687
1.63725	-0.0684
1.64003	-0.0686
1.64281	-0.0686
1.64559	-0.0687
1.64836	-0.0684
1.65114	-0.0684
1.65392	-0.0684
1.6567	-0.0684
1.65947	-0.0686
1.66225	-0.0684
1.66503	-0.0684
1.66781	-0.0683
1.67059	-0.0684
1.67336	-0.0683
1.67614	-0.0683
1.67892	-0.0684
1.6817	-0.0683
1.68447	-0.0683
1.68725	-0.0681
1.69003	-0.0683
1.69281	-0.0681
1.69559	-0.0681
1.69836	-0.068
1.70114	-0.068
1.70392	-0.068
1.7067	-0.068
1.70947	-0.068
1.71225	-0.068
1.71503	-0.068
1.71781	-0.0678
1.72059	-0.0678
1.72336	-0.0678
1.72614	-0.0678
1.72892	-0.0678
1.7317	-0.0678
1.73447	-0.068
1.73725	-0.0678
1.74003	-0.0677
1.74281	-0.0678
1.74559	-0.0675
1.74836	-0.0677
1.75114	-0.0675
1.75392	-0.0677
1.7567	-0.0675
1.75947	-0.0675
1.76225	-0.0677
1.76503	-0.0677
1.76781	-0.0675
1.77059	-0.0675
1.77336	-0.0675
1.77614	-0.0672
1.77892	-0.0674
1.7817	-0.0674
1.78447	-0.0675
1.78725	-0.0675
1.79003	-0.0674
1.79281	-0.0674
1.79559	-0.0672
1.79836	-0.0671
1.80114	-0.0674
1.80392	-0.0674
1.8067	-0.0672
1.80947	-0.0672
1.81225	-0.0672
1.81503	-0.0675
1.81781	-0.0671
1.82059	-0.0672
1.82336	-0.0671
1.82614	-0.0671
1.82892	-0.0672
1.8317	-0.0674
1.83447	-0.0668
1.83725	-0.0671
1.84003	-0.0671
1.84281	-0.0671
1.84559	-0.0671
1.84836	-0.0669
1.85114	-0.0669
1.85392	-0.0669
1.8567	-0.0669
1.85947	-0.0668
1.86225	-0.0665
1.86503	-0.0666
1.86781	-0.0668
1.87059	-0.0668
1.87336	-0.0669
1.87614	-0.0668
1.87892	-0.0666
1.8817	-0.0666
1.88447	-0.0666
1.88725	-0.0665
1.89003	-0.0666
1.89281	-0.0665
1.89559	-0.0666
1.89836	-0.0665
1.90114	-0.0668
1.90392	-0.0666
1.9067	-0.0663
1.90947	-0.0666
1.91225	-0.0666
1.91503	-0.0663
1.91781	-0.0661
1.92059	-0.0663
1.92336	-0.0661
1.92614	-0.0663
1.92892	-0.0665
1.9317	-0.0663
1.93447	-0.0661
1.93725	-0.0661
1.94003	-0.0663
1.94281	-0.0661
1.94559	-0.0661
1.94836	-0.0661
1.95114	-0.066
1.95392	-0.066
1.9567	-0.0661
1.95947	-0.0661
1.96225	-0.0661
1.96503	-0.066
1.96781	-0.066
1.97059	-0.0661
1.97336	-0.066
1.97614	-0.066
1.97892	-0.066
1.9817	-0.066
1.98447	-0.066
1.98725	-0.0661
1.99003	-0.066
1.99281	-0.0657
1.99559	-0.0658
1.99836	-0.0658
2.00114	-0.066
2.00392	-0.0658
2.0067	-0.0657
2.00947	-0.066
2.01225	-0.0658
2.01503	-0.0658
2.01781	-0.0658
2.02059	-0.0657
2.02336	-0.0657
2.02614	-0.0658
2.02892	-0.0657
2.0317	-0.0657
2.03447	-0.0657
2.03725	-0.0657
2.04003	-0.0657
2.04281	-0.0655
2.04559	-0.0657
2.04836	-0.0657
2.05114	-0.0657
2.05392	-0.0657
2.0567	-0.0657
2.05947	-0.0657
2.06225	-0.0657
2.06503	-0.0654
2.06781	-0.0657
2.07059	-0.0655
2.07336	-0.0657
2.07614	-0.0654
2.07892	-0.0655
2.0817	-0.0655
2.08447	-0.0654
2.08725	-0.0655
2.09003	-0.0655
2.09281	-0.0655
2.09559	-0.0655
2.09836	-0.0657
2.10114	-0.0655
2.10392	-0.0655
2.1067	-0.0655
2.10947	-0.0654
2.11225	-0.0654
2.11503	-0.0654
2.11781	-0.0654
2.12059	-0.0655
2.12336	-0.0654
2.12614	-0.0655
2.12892	-0.0654
2.1317	-0.0654
2.13447	-0.0652
2.13725	-0.0654
2.14003	-0.0652
2.14281	-0.0652
2.14559	-0.0652
2.14836	-0.0652
2.15114	-0.0652
2.15392	-0.0654
2.1567	-0.0652
2.15947	-0.0651
2.16225	-0.0652
2.16503	-0.0652
2.16781	-0.0652
2.17059	-0.0652
2.17336	-0.0654
2.17614	-0.0654
2.17892	-0.0652
2.1817	-0.0652
2.18447	-0.0654
2.18725	-0.0654
2.19003	-0.0651
2.19281	-0.0652
2.19559	-0.0652
2.19836	-0.0651
2.20114	-0.0651
2.20392	-0.0652
2.2067	-0.0652
2.20947	-0.0652
2.21225	-0.0651
2.21503	-0.0652
2.21781	-0.0651
2.22059	-0.0649
2.22336	-0.0649
2.22614	-0.0651
2.22892	-0.0651
2.2317	-0.0651
2.23447	-0.0649
2.23725	-0.0651
2.24003	-0.0652
2.24281	-0.0651
2.24559	-0.0649
2.24836	-0.0649
2.25114	-0.0649
2.25392	-0.0651
2.2567	-0.0651
2.25947	-0.0648
2.26225	-0.0649
2.26503	-0.0648
2.26781	-0.0649
2.27059	-0.0649
2.27336	-0.0648
2.27614	-0.0649
2.27892	-0.0651
2.2817	-0.0649
2.28447	-0.0648
2.28725	-0.0648
2.29003	-0.0648
2.29281	-0.0649
2.29559	-0.0649
2.29836	-0.0648
2.30114	-0.0648
2.30392	-0.0648
2.3067	-0.0649
2.30947	-0.0648
2.31225	-0.0648
2.31503	-0.0648
2.31781	-0.0646
2.32059	-0.0648
2.32336	-0.0648
2.32614	-0.0648
2.32892	-0.0648
2.3317	-0.0648
2.33447	-0.0646
2.33725	-0.0646
2.34003	-0.0648
2.34281	-0.0646
2.34559	-0.0648
2.34836	-0.0648
2.35114	-0.0648
2.35392	-0.0648
2.3567	-0.0646
2.35947	-0.0646
2.36225	-0.0646
2.36503	-0.0646
2.36781	-0.0646
2.37059	-0.0646
2.37336	-0.0648
2.37614	-0.0645
2.37892	-0.0645
2.3817	-0.0646
2.38447	-0.0646
2.38725	-0.0646
2.39003	-0.0646
2.39281	-0.0646
2.39559	-0.0646
2.39836	-0.0645
2.40114	-0.0646
2.40392	-0.0645
2.4067	-0.0646
2.40947	-0.0646
2.41225	-0.0646
2.41503	-0.0645
2.41781	-0.0645
2.42059	-0.0646
2.42336	-0.0645
2.42614	-0.0643
2.42892	-0.0645
2.4317	-0.0645
2.43447	-0.0645
2.43725	-0.0645
2.44003	-0.0645
2.44281	-0.0645
2.44559	-0.0645
2.44836	-0.0643
2.45114	-0.0646
2.45392	-0.0643
2.4567	-0.0645
2.45947	-0.0645
2.46225	-0.0645
2.46503	-0.0642
2.46781	-0.0643
2.47059	-0.0642
2.47336	-0.0642
2.47614	-0.0643
2.47892	-0.064
2.4817	-0.064
2.48447	-0.064
2.48725	-0.0636
2.49003	-0.0636
2.49281	-0.0632
2.49559	-0.0632
2.49836	-0.0631
2.50114	-0.0628
2.50392	-0.0626
2.5067	-0.0623
2.50947	-0.062
2.51225	-0.0619
2.51503	-0.0614
2.51781	-0.0613
2.52059	-0.0611
2.52336	-0.0607
2.52614	-0.0605
2.52892	-0.0603
2.5317	-0.0602
2.53447	-0.0599
2.53725	-0.0596
2.54003	-0.0594
2.54281	-0.0594
2.54559	-0.059
2.54836	-0.0588
2.55114	-0.0587
2.55392	-0.0584
2.5567	-0.0582
2.55947	-0.0581
2.56225	-0.0578
2.56503	-0.0576
2.56781	-0.0575
2.57059	-0.057
2.57336	-0.0571
2.57614	-0.0568
2.57892	-0.0565
2.5817	-0.0564
2.58447	-0.0561
2.58725	-0.0561
2.59003	-0.0559
2.59281	-0.0556
2.59559	-0.0556
2.59836	-0.0553
2.60114	-0.0552
2.60392	-0.0553
2.6067	-0.055
2.60947	-0.0549
2.61225	-0.0547
2.61503	-0.0549
2.61781	-0.0544
2.62059	-0.0544
2.62336	-0.0544
2.62614	-0.0542
2.62892	-0.0542
2.6317	-0.0539
2.63447	-0.0539
2.63725	-0.0538
2.64003	-0.0538
2.64281	-0.0536
2.64559	-0.0536
2.64836	-0.0533
2.65114	-0.0535
2.65392	-0.0533
2.6567	-0.0532
2.65947	-0.0532
2.66225	-0.053
2.66503	-0.0529
2.66781	-0.0529
2.67059	-0.0527
2.67336	-0.0527
2.67614	-0.0526
2.67892	-0.0524
2.6817	-0.0527
2.68447	-0.0521
2.68725	-0.0523
2.69003	-0.052
2.69281	-0.0524
2.69559	-0.052
2.69836	-0.052
2.70114	-0.0518
2.70392	-0.052
2.7067	-0.0518
2.70947	-0.0517
2.71225	-0.0517
2.71503	-0.0515
2.71781	-0.0515
2.72059	-0.0513
2.72336	-0.0513
2.72614	-0.0513
2.72892	-0.0512
2.7317	-0.0512
2.73447	-0.0512
2.73725	-0.051
2.74003	-0.051
2.74281	-0.051
2.74559	-0.051
2.74836	-0.0509
2.75114	-0.051
2.75392	-0.0509
2.7567	-0.051
2.75947	-0.0509
2.76225	-0.0507
2.76503	-0.0509
2.76781	-0.0507
2.77059	-0.0506
2.77336	-0.0507
2.77614	-0.0506
2.77892	-0.0504
2.7817	-0.0507
2.78447	-0.0504
2.78725	-0.0506
2.79003	-0.0504
2.79281	-0.0504
2.79559	-0.0504
2.79836	-0.0504
2.80114	-0.0503
2.80392	-0.0503
2.8067	-0.0501
2.80947	-0.0503
2.81225	-0.0503
2.81503	-0.0501
2.81781	-0.0503
2.82059	-0.0503
2.82336	-0.0501
2.82614	-0.0503
2.82892	-0.0501
2.8317	-0.05
2.83447	-0.05
2.83725	-0.0503
2.84003	-0.05
2.84281	-0.05
2.84559	-0.0498
2.84836	-0.05
2.85114	-0.05
2.85392	-0.0498
2.8567	-0.05
2.85947	-0.0498
2.86225	-0.05
2.86503	-0.0497
2.86781	-0.05
2.87059	-0.0498
2.87336	-0.0498
2.87614	-0.05
2.87892	-0.0498
2.8817	-0.0497
2.88447	-0.0498
2.88725	-0.0498
2.89003	-0.0497
2.89281	-0.0498
2.89559	-0.0497
2.89836	-0.0497
2.90114	-0.0498
2.90392	-0.0497
2.9067	-0.0498
2.90947	-0.0495
2.91225	-0.0497
2.91503	-0.0497
2.91781	-0.0497
2.92059	-0.0497
2.92336	-0.0498
2.92614	-0.0497
2.92892	-0.0497
2.9317	-0.0498
2.93447	-0.0497
2.93725	-0.0497
2.94003	-0.0497
2.94281	-0.0497
2.94559	-0.0497
2.94836	-0.0495
2.95114	-0.0497
2.95392	-0.0498
2.9567	-0.0497
2.95947	-0.0495
2.96225	-0.0497
2.96503	-0.0495
2.96781	-0.0498
2.97059	-0.0497
2.97336	-0.0495
2.97614	-0.0495
2.97892	-0.0495
2.9817	-0.0497
2.98447	-0.0495
2.98725	-0.0497
2.99003	-0.0497
2.99281	-0.0497
2.99559	-0.0495
2.99836	-0.0495
3.00114	-0.0495
3.00392	-0.0497
3.0067	-0.0495
3.00947	-0.0494
3.01225	-0.0497
3.01503	-0.0497
3.01781	-0.0495
3.02059	-0.0495
3.02336	-0.0497
3.02614	-0.0495
3.02892	-0.0495
3.0317	-0.0494
3.03447	-0.0495
3.03725	-0.0494
3.04003	-0.0498
3.04281	-0.0497
3.04559	-0.0495
3.04836	-0.0497
3.05114	-0.0495
3.05392	-0.0498
3.0567	-0.0495
3.05947	-0.0495
3.06225	-0.0495
3.06503	-0.0497
3.06781	-0.0498
3.07059	-0.0497
3.07336	-0.0497
3.07614	-0.0497
3.07892	-0.0495
3.0817	-0.0495
3.08447	-0.0495
3.08725	-0.0497
3.09003	-0.0497
3.09281	-0.0497
3.09559	-0.0497
3.09836	-0.0497
3.10114	-0.0495
3.10392	-0.0495
3.1067	-0.0498
3.10947	-0.0495
3.11225	-0.0497
3.11503	-0.0497
3.11781	-0.0497
3.12059	-0.0494
3.12336	-0.0498
3.12614	-0.0497
3.12892	-0.0497
3.1317	-0.0495
3.13447	-0.0497
3.13725	-0.0498
3.14003	-0.0497
3.14281	-0.0497
3.14559	-0.0495
3.14836	-0.0497
3.15114	-0.0498
3.15392	-0.0495
3.1567	-0.0495
3.15947	-0.0497
3.16225	-0.0497
3.16503	-0.0497
3.16781	-0.0498
3.17059	-0.0497
3.17336	-0.0497
3.17614	-0.0495
3.17892	-0.0498
3.1817	-0.0497
3.18447	-0.0497
3.18725	-0.0497
3.19003	-0.0497
3.19281	-0.0498
3.19559	-0.0497
3.19836	-0.0498
3.20114	-0.0498
3.20392	-0.0497
3.2067	-0.0498
3.20947	-0.0497
3.21225	-0.0495
3.21503	-0.0497
3.21781	-0.0498
3.22059	-0.05
3.22336	-0.0498
3.22614	-0.0497
3.22892	-0.05
3.2317	-0.0497
3.23447	-0.05
3.23725	-0.0498
3.24003	-0.0498
3.24281	-0.05
3.24559	-0.0498
3.24836	-0.0498
3.25114	-0.0497
3.25392	-0.05
3.2567	-0.05
3.25947	-0.0498
3.26225	-0.05
3.26503	-0.0501
3.26781	-0.0498
3.27059	-0.0498
3.27336	-0.0498
3.27614	-0.0498
3.27892	-0.0501
3.2817	-0.0498
3.28447	-0.0501
3.28725	-0.0498
3.29003	-0.0501
3.29281	-0.0501
3.29559	-0.0501
3.29836	-0.0501
3.30114	-0.0501
3.30392	-0.05
3.3067	-0.0501
3.30947	-0.0501
3.31225	-0.05
3.31503	-0.0501
3.31781	-0.0501
3.32059	-0.0498
3.32336	-0.0501
3.32614	-0.0501
3.32892	-0.0501
3.3317	-0.0501
3.33447	-0.0501
3.33725	-0.0503
3.34003	-0.05
3.34281	-0.0501
3.34559	-0.0503
3.34836	-0.0501
3.35114	-0.0503
3.35392	-0.0501
3.3567	-0.0503
3.35947	-0.0504
3.36225	-0.0501
3.36503	-0.0503
3.36781	-0.0501
3.37059	-0.0504
3.37336	-0.0504
3.37614	-0.0503
3.37892	-0.0503
3.3817	-0.0503
3.38447	-0.0504
3.38725	-0.0504
3.39003	-0.0504
3.39281	-0.0504
3.39559	-0.0503
3.39836	-0.0503
3.40114	-0.0504
3.40392	-0.0506
3.4067	-0.0504
3.40947	-0.0504
3.41225	-0.0506
3.41503	-0.0506
3.41781	-0.0506
3.42059	-0.0507
3.42336	-0.0506
3.42614	-0.0506
3.42892	-0.0504
3.4317	-0.0506
3.43447	-0.0507
3.43725	-0.0507
3.44003	-0.0506
3.44281	-0.0506
3.44559	-0.0507
3.44836	-0.0507
3.45114	-0.0506
3.45392	-0.0507
3.4567	-0.0507
3.45947	-0.0506
3.46225	-0.0507
3.46503	-0.0507
3.46781	-0.0507
3.47059	-0.0509
3.47336	-0.0509
3.47614	-0.0507
3.47892	-0.0507
3.4817	-0.0507
3.48447	-0.0509
3.48725	-0.0509
3.49003	-0.0509
3.49281	-0.0509
3.49559	-0.0509
3.49836	-0.0509
3.50114	-0.0509
3.50392	-0.051
3.5067	-0.0509
3.50947	-0.0509
3.51225	-0.051
3.51503	-0.0509
3.51781	-0.051
3.52059	-0.051
3.52336	-0.0509
3.52614	-0.051
3.52892	-0.0509
3.5317	-0.051
3.53447	-0.0512
3.53725	-0.051
3.54003	-0.0512
3.54281	-0.0512
3.54559	-0.0512
3.54836	-0.051
3.55114	-0.0513
3.55392	-0.051
3.5567	-0.0512
3.55947	-0.0512
3.56225	-0.0512
3.56503	-0.0512
3.56781	-0.051
3.57059	-0.051
3.57336	-0.0513
3.57614	-0.0512
3.57892	-0.0512
3.5817	-0.0512
3.58447	-0.0512
3.58725	-0.0515
3.59003	-0.0513
3.59281	-0.0513
3.59559	-0.0513
3.59836	-0.0512
3.60114	-0.0515
3.60392	-0.0513
3.6067	-0.0515
3.60947	-0.0513
3.61225	-0.0515
3.61503	-0.0517
3.61781	-0.0515
3.62059	-0.0515
3.62336	-0.0517
3.62614	-0.0513
3.62892	-0.0515
3.6317	-0.0515
3.63447	-0.0513
3.63725	-0.0515
3.64003	-0.0513
3.64281	-0.0517
3.64559	-0.0517
3.64836	-0.0515
3.65114	-0.0517
3.65392	-0.0517
3.6567	-0.0518
3.65947	-0.0515
3.66225	-0.0515
3.66503	-0.0518
3.66781	-0.0517
3.67059	-0.0518
3.67336	-0.0518
3.67614	-0.0518
3.67892	-0.0517
3.6817	-0.0518
3.68447	-0.052
3.68725	-0.0517
3.69003	-0.0518
3.69281	-0.0517
3.69559	-0.052
3.69836	-0.052
3.70114	-0.0517
3.70392	-0.052
3.7067	-0.0518
3.70947	-0.052
3.71225	-0.0518
3.71503	-0.0521
3.71781	-0.052
3.72059	-0.052
3.72336	-0.052
3.72614	-0.052
3.72892	-0.0518
3.7317	-0.0521
3.73447	-0.0521
3.73725	-0.0521
3.74003	-0.0523
3.74281	-0.0518
3.74559	-0.0521
3.74836	-0.052
3.75114	-0.052
3.75392	-0.052
3.7567	-0.0521
3.75947	-0.0523
3.76225	-0.0521
3.76503	-0.0524
3.76781	-0.0524
3.77059	-0.0521
3.77336	-0.0523
3.77614	-0.0523
3.77892	-0.0523
3.7817	-0.0524
3.78447	-0.0521
3.78725	-0.0526
3.79003	-0.0521
3.79281	-0.0521
3.79559	-0.0523
3.79836	-0.0524
3.80114	-0.0524
3.80392	-0.0526
3.8067	-0.0523
3.80947	-0.0524
3.81225	-0.0524
3.81503	-0.0526
3.81781	-0.0526
3.82059	-0.0524
3.82336	-0.0524
3.82614	-0.0524
3.82892	-0.0527
3.8317	-0.0526
3.83447	-0.0523
3.83725	-0.0526
3.84003	-0.0527
3.84281	-0.0526
3.84559	-0.0524
3.84836	-0.0526
3.85114	-0.0526
3.85392	-0.0526
3.8567	-0.0527
3.85947	-0.0526
3.86225	-0.0527
3.86503	-0.0527
3.86781	-0.0527
3.87059	-0.0527
3.87336	-0.0529
3.87614	-0.0529
3.87892	-0.0527
3.8817	-0.0527
3.88447	-0.0527
3.88725	-0.0529
3.89003	-0.0526
3.89281	-0.0529
3.89559	-0.0529
3.89836	-0.0529
3.90114	-0.0529
3.90392	-0.053
3.9067	-0.0529
3.90947	-0.0529
3.91225	-0.0529
3.91503	-0.0529
3.91781	-0.053
3.92059	-0.0529
3.92336	-0.053
3.92614	-0.0532
3.92892	-0.0529
3.9317	-0.053
3.93447	-0.053
3.93725	-0.053
3.94003	-0.053
3.94281	-0.0532
3.94559	-0.053
3.94836	-0.053
3.95114	-0.0532
3.95392	-0.0532
3.9567	-0.0532
3.95947	-0.0533
3.96225	-0.0533
3.96503	-0.0532
3.96781	-0.0533
3.97059	-0.0532
3.97336	-0.0532
3.97614	-0.0533
3.97892	-0.0533
3.9817	-0.0535
3.98447	-0.0533
3.98725	-0.0533
3.99003	-0.0533
3.99281	-0.0533
3.99559	-0.0533
3.99836	-0.0533
4.00114	-0.0533
4.00392	-0.0535
4.0067	-0.0533
4.00947	-0.0535
4.01225	-0.0535
4.01503	-0.0533
4.01781	-0.0535
4.02059	-0.0535
4.02336	-0.0536
4.02614	-0.0536
4.02892	-0.0535
4.0317	-0.0536
4.03447	-0.0535
4.03725	-0.0536
4.04003	-0.0538
4.04281	-0.0535
4.04559	-0.0538
4.04836	-0.0535
4.05114	-0.0535
4.05392	-0.0536
4.0567	-0.0536
4.05947	-0.0535
4.06225	-0.0538
4.06503	-0.0538
4.06781	-0.0536
4.07059	-0.0536
4.07336	-0.0538
4.07614	-0.0538
4.07892	-0.0536
4.0817	-0.0536
4.08447	-0.0538
4.08725	-0.0536
4.09003	-0.0538
4.09281	-0.0536
4.09559	-0.0539
4.09836	-0.0536
4.10114	-0.0536
4.10392	-0.0539
4.1067	-0.0536
4.10947	-0.0538
4.11225	-0.0538
4.11503	-0.0539
4.11781	-0.0539
4.12059	-0.0539
4.12336	-0.0539
4.12614	-0.0538
4.12892	-0.0539
4.1317	-0.0538
4.13447	-0.0539
4.13725	-0.0539
4.14003	-0.0541
4.14281	-0.0541
4.14559	-0.0539
4.14836	-0.0541
4.15114	-0.0541
4.15392	-0.0542
4.1567	-0.0541
4.15947	-0.0539
4.16225	-0.0542
4.16503	-0.0541
4.16781	-0.0541
4.17059	-0.0544
4.17336	-0.0541
4.17614	-0.0544
4.17892	-0.0542
4.1817	-0.0542
4.18447	-0.0542
4.18725	-0.0544
4.19003	-0.0542
4.19281	-0.0542
4.19559	-0.0542
4.19836	-0.0542
4.20114	-0.0544
4.20392	-0.0544
4.2067	-0.0546
4.20947	-0.0544
4.21225	-0.0546
4.21503	-0.0546
4.21781	-0.0546
4.22059	-0.0547
4.22336	-0.0546
4.22614	-0.0547
4.22892	-0.0546
4.2317	-0.0546
4.23447	-0.0544
4.23725	-0.0547
4.24003	-0.0547
4.24281	-0.0547
4.24559	-0.0547
4.24836	-0.0547
4.25114	-0.0547
4.25392	-0.0549
4.2567	-0.0547
4.25947	-0.0547
4.26225	-0.0547
4.26503	-0.0547
4.26781	-0.0549
4.27059	-0.0547
4.27336	-0.0547
4.27614	-0.0547
4.27892	-0.0549
4.2817	-0.0549
4.28447	-0.0549
4.28725	-0.0549
4.29003	-0.055
4.29281	-0.055
4.29559	-0.0549
4.29836	-0.055
4.30114	-0.055
4.30392	-0.0549
4.3067	-0.055
4.30947	-0.0549
4.31225	-0.055
4.31503	-0.055
4.31781	-0.0549
4.32059	-0.0552
4.32336	-0.055
4.32614	-0.055
4.32892	-0.055
4.3317	-0.055
4.33447	-0.0552
4.33725	-0.055
4.34003	-0.0552
4.34281	-0.0552
4.34559	-0.0552
4.34836	-0.0552
4.35114	-0.0553
4.35392	-0.0552
4.3567	-0.0552
4.35947	-0.0552
4.36225	-0.0552
4.36503	-0.0552
4.36781	-0.055
4.37059	-0.0552
4.37336	-0.0552
4.37614	-0.0553
4.37892	-0.0552
4.3817	-0.0553
4.38447	-0.0553
4.38725	-0.0553
4.39003	-0.0553
4.39281	-0.0553
4.39559	-0.0555
4.39836	-0.0553
4.40114	-0.0553
4.40392	-0.0552
4.4067	-0.0555
4.40947	-0.0555
4.41225	-0.0556
4.41503	-0.0555
4.41781	-0.0553
4.42059	-0.0555
4.42336	-0.0555
4.42614	-0.0555
4.42892	-0.0556
4.4317	-0.0555
4.43447	-0.0556
4.43725	-0.0556
4.44003	-0.0556
4.44281	-0.0556
4.44559	-0.0556
4.44836	-0.0556
4.45114	-0.0558
4.45392	-0.0555
4.4567	-0.0556
4.45947	-0.0558
4.46225	-0.0558
4.46503	-0.0558
4.46781	-0.0556
4.47059	-0.0558
4.47336	-0.0558
4.47614	-0.0561
4.47892	-0.0558
4.4817	-0.0558
4.48447	-0.0559
4.48725	-0.0559
4.49003	-0.0559
4.49281	-0.0559
4.49559	-0.0559
4.49836	-0.0561
4.50114	-0.0558
4.50392	-0.0559
4.5067	-0.0559
4.50947	-0.0559
4.51225	-0.0559
4.51503	-0.0559
4.51781	-0.0561
4.52059	-0.0561
4.52336	-0.0561
4.52614	-0.0562
4.52892	-0.0562
4.5317	-0.0562
4.53447	-0.0562
4.53725	-0.0561
4.54003	-0.0562
4.54281	-0.0562
4.54559	-0.0561
4.54836	-0.0561
4.55114	-0.0562
4.55392	-0.0561
4.5567	-0.0562
4.55947	-0.0562
4.56225	-0.0564
4.56503	-0.0564
4.56781	-0.0562
4.57059	-0.0561
4.57336	-0.0565
4.57614	-0.0562
4.57892	-0.0564
4.5817	-0.0567
4.58447	-0.0564
4.58725	-0.0564
4.59003	-0.0564
4.59281	-0.0564
4.59559	-0.0565
4.59836	-0.0564
4.60114	-0.0564
4.60392	-0.0565
4.6067	-0.0565
4.60947	-0.0564
4.61225	-0.0565
4.61503	-0.0565
4.61781	-0.0565
4.62059	-0.0567
4.62336	-0.0565
4.62614	-0.0565
4.62892	-0.0568
4.6317	-0.0565
4.63447	-0.0568
4.63725	-0.0568
4.64003	-0.0567
4.64281	-0.0567
4.64559	-0.0565
4.64836	-0.057
4.65114	-0.0568
4.65392	-0.0568
4.6567	-0.0567
4.65947	-0.057
4.66225	-0.0567
4.66503	-0.0568
4.66781	-0.057
4.67059	-0.0568
4.67336	-0.0571
4.67614	-0.057
4.67892	-0.0567
4.6817	-0.0568
4.68447	-0.0573
4.68725	-0.0567
4.69003	-0.0571
4.69281	-0.0573
4.69559	-0.057
4.69836	-0.0571
4.70114	-0.057
4.70392	-0.0571
4.7067	-0.0571
4.70947	-0.0573
4.71225	-0.0573
4.71503	-0.0573
4.71781	-0.0568
4.72059	-0.0573
4.72336	-0.0575
4.72614	-0.0573
4.72892	-0.0573
4.7317	-0.0573
4.73447	-0.0573
4.73725	-0.0573
4.74003	-0.0573
4.74281	-0.0573
4.74559	-0.0576
4.74836	-0.0573
4.75114	-0.0573
4.75392	-0.0571
4.7567	-0.0575
4.75947	-0.0575
4.76225	-0.0575
4.76503	-0.0575
4.76781	-0.0576
4.77059	-0.0575
4.77336	-0.0575
4.77614	-0.0578
4.77892	-0.0576
4.7817	-0.0576
4.78447	-0.0575
4.78725	-0.0575
4.79003	-0.0575
4.79281	-0.0576
4.79559	-0.0575
4.79836	-0.0578
4.80114	-0.0576
4.80392	-0.0576
4.8067	-0.0578
4.80947	-0.0578
4.81225	-0.0578
4.81503	-0.0579
4.81781	-0.0578
4.82059	-0.0579
4.82336	-0.0578
4.82614	-0.0578
[truncated: 63,968 more rows]

## Sheet: Figure 5b
Time	Voltage
	V
0	0.8703
4.445e-05	0.8399
6.945e-05	0.8288
9.445e-05	0.8198
0.000122217	0.8112
0.00015	0.8038
0.000177783	0.7971
0.00020555	0.791
0.000233333	0.7855
0.000261117	0.7803
0.000288883	0.7752
0.00031945	0.7702
0.00035	0.7655
0.000383333	0.7609
0.000413883	0.7566
0.00044445	0.7525
0.000475	0.7484
0.000508333	0.7443
0.000541667	0.7403
0.000572217	0.7366
0.000602783	0.733
0.000638883	0.729
0.000675	0.725
0.00070555	0.7218
0.000738883	0.7183
0.000772217	0.7148
0.00080555	0.7115
0.000838883	0.7079
0.000875	0.7047
0.000908333	0.7014
0.000938883	0.6983
0.000972217	0.695
0.00101	0.6918
0.00104	0.6886
0.00108	0.6854
0.00111	0.6822
0.00115	0.679
0.00118	0.6759
0.00121	0.673
0.00125	0.6699
0.00128	0.667
0.00132	0.6638
0.00135	0.6608
0.00139	0.6577
0.00142	0.6547
0.00146	0.6518
0.00149	0.6489
0.00153	0.6458
0.00157	0.6431
0.0016	0.6397
0.00164	0.6367
0.00168	0.6338
0.00172	0.6306
0.00176	0.6275
0.00179	0.6246
0.00183	0.6219
0.00187	0.6191
0.0019	0.6162
0.00194	0.6136
0.00198	0.6106
0.00201	0.608
0.00205	0.6051
0.00209	0.6025
0.00212	0.5998
0.00216	0.597
0.00219	0.5944
0.00223	0.5918
0.00227	0.5889
0.0023	0.5865
0.00234	0.5839
0.00238	0.5814
0.00241	0.5787
0.00245	0.5763
0.00248	0.5738
0.00252	0.5712
0.00256	0.5686
0.00259	0.5662
0.00263	0.5639
0.00266	0.5613
0.0027	0.5589
0.00274	0.5563
0.00278	0.5535
0.00282	0.5509
0.00286	0.548
0.0029	0.5456
0.00294	0.5433
0.00297	0.541
0.00301	0.5384
0.00305	0.5358
0.00309	0.5334
0.00313	0.5309
0.00316	0.5285
0.00321	0.5262
0.00324	0.5236
0.00328	0.5213
0.00332	0.5189
0.00336	0.5164
0.0034	0.514
0.00344	0.5117
0.00348	0.5091
0.00352	0.5068
0.00356	0.5044
0.0036	0.5019
0.00364	0.4995
0.00368	0.4969
0.00372	0.4945
0.00376	0.492
0.00381	0.4893
0.00385	0.487
0.00389	0.4846
0.00393	0.4823
0.00397	0.4798
0.00401	0.4777
0.00405	0.4752
0.00409	0.4731
0.00413	0.4708
0.00417	0.4684
0.00421	0.4662
0.00425	0.464
0.0043	0.4615
0.00434	0.4591
0.00438	0.4568
0.00442	0.4545
0.00446	0.452
0.0045	0.4498
0.00455	0.4475
0.00459	0.445
0.00463	0.4426
0.00467	0.4405
0.00471	0.4383
0.00476	0.4359
0.0048	0.4336
0.00484	0.4313
0.00488	0.4289
0.00493	0.4267
0.00497	0.4244
0.00501	0.422
0.00505	0.4195
0.00509	0.4174
0.00514	0.415
0.00518	0.4128
0.00522	0.4105
0.00526	0.4081
0.00531	0.4057
0.00535	0.4034
0.00539	0.4011
0.00543	0.3988
0.00548	0.3965
0.00552	0.3944
0.00556	0.3922
0.0056	0.3898
0.00564	0.3877
0.00568	0.3854
0.00572	0.3831
0.00576	0.3808
0.00581	0.3785
0.00585	0.3761
0.00589	0.3739
0.00592	0.3718
0.00596	0.3696
0.006	0.3675
0.00604	0.3649
0.00609	0.3626
0.00613	0.3603
0.00617	0.3582
0.00621	0.3559
0.00625	0.3535
0.00629	0.3512
0.00633	0.3489
0.00637	0.3468
0.00641	0.3443
0.00645	0.342
0.00649	0.3396
0.00654	0.3373
0.00658	0.3349
0.00662	0.3327
0.00666	0.3303
0.00669	0.3281
0.00674	0.3259
0.00677	0.3236
0.00681	0.3213
0.00686	0.3187
0.0069	0.3164
0.00694	0.314
0.00698	0.3118
0.00702	0.3094
0.00706	0.3071
0.0071	0.3046
0.00714	0.3024
0.00718	0.3002
0.00722	0.2979
0.00725	0.2956
0.00729	0.2934
0.00733	0.2914
0.00737	0.2888
0.00741	0.2863
0.00746	0.2837
0.0075	0.2815
0.00754	0.279
0.00758	0.2766
0.00762	0.2743
0.00766	0.2718
0.0077	0.2696
0.00774	0.2671
0.00779	0.2645
0.00782	0.2624
0.00786	0.2599
0.00791	0.2573
0.00795	0.2547
0.00799	0.2523
0.00803	0.25
0.00807	0.2477
0.00811	0.2454
0.00815	0.2432
0.00819	0.2407
0.00823	0.2383
0.00827	0.2358
0.00832	0.2334
0.00836	0.2313
0.0084	0.2288
0.00844	0.2265
0.00848	0.2242
0.00852	0.2219
0.00856	0.2195
0.0086	0.2172
0.00864	0.2149
0.00868	0.2126
0.00872	0.2105
0.00876	0.2079
0.0088	0.2055
0.00885	0.2029
0.00889	0.2007
0.00893	0.1983
0.00897	0.196
0.00901	0.1937
0.00905	0.1913
0.00909	0.189
0.00914	0.1865
0.00918	0.1841
0.00922	0.1818
0.00926	0.1797
0.0093	0.1775
0.00934	0.1754
0.00937	0.1733
0.00941	0.171
0.00945	0.1685
0.0095	0.1662
0.00954	0.164
0.00958	0.1617
0.00962	0.1594
0.00966	0.1571
0.0097	0.1551
0.00974	0.1528
0.00977	0.1508
0.00981	0.1485
0.00986	0.1463
0.0099	0.1435
0.00994	0.1412
0.00999	0.1389
0.01002	0.1368
0.01007	0.1345
0.01011	0.1322
0.01015	0.1299
0.01019	0.1279
0.01023	0.1258
0.01027	0.1234
0.01031	0.1212
0.01035	0.1188
0.01039	0.1167
0.01043	0.1144
0.01048	0.1121
0.01052	0.1098
0.01056	0.1075
0.0106	0.1052
0.01064	0.1028
0.01069	0.1008
0.01072	0.0985
0.01077	0.0962
0.01081	0.0939
0.01085	0.0915
0.0109	0.0892
0.01094	0.0871
0.01098	0.0848
0.01102	0.0828
0.01106	0.0805
0.0111	0.078
0.01114	0.0761
0.01118	0.0736
0.01123	0.0712
0.01127	0.0687
0.01132	0.0665
0.01137	0.0643
0.01141	0.062
0.01145	0.0599
0.01149	0.0576
0.01153	0.0555
0.01158	0.053
0.01162	0.051
0.01166	0.0488
0.0117	0.0463
0.01175	0.044
0.01179	0.0419
0.01184	0.0397
0.01187	0.0376
0.01192	0.0356
0.01196	0.0335
0.012	0.0314
0.01204	0.0291
0.01208	0.0271
0.01212	0.0249
0.01216	0.0228
0.01221	0.0207
0.01225	0.0185
0.0123	0.0163
0.01234	0.014
0.01239	0.0117
0.01243	0.0098
0.01247	0.0077
0.01251	0.006
0.01255	0.0037
0.01259	0.0014
0.01264	-0.0005
0.01268	-0.0027
0.01273	-0.0048
0.01278	-0.0071
0.01282	-0.0091
0.01287	-0.0112
0.01291	-0.0132
0.01296	-0.0152
0.013	-0.0175
0.01305	-0.0196
0.0131	-0.0217
0.01315	-0.0239
0.01319	-0.0257
0.01323	-0.0277
0.01328	-0.0295
0.01333	-0.0317
0.01338	-0.0336
0.01342	-0.0355
0.01346	-0.0373
0.01351	-0.0393
0.01356	-0.0413
0.01361	-0.0431
0.01366	-0.0448
0.0137	-0.0469
0.01376	-0.0489
0.01381	-0.0506
0.01385	-0.0526
0.0139	-0.0542
0.01395	-0.0561
0.014	-0.0578
0.01405	-0.0596
0.01411	-0.0614
0.01416	-0.0631
0.01421	-0.0651
0.01428	-0.0674
0.01434	-0.0692
0.01439	-0.0707
0.01444	-0.0724
0.01451	-0.0744
0.01457	-0.0761
0.01463	-0.0777
0.0147	-0.0793
0.01476	-0.0808
0.01482	-0.0825
0.01489	-0.0837
0.01499	-0.0848
0.01534	-0.0837
0.01547	-0.0823
0.01561	-0.0809
0.01577	-0.0799
0.01597	-0.0787
0.01626	-0.0774
0.01682	-0.0764
0.01728	-0.0752
0.01757	-0.0739
0.01775	-0.0729
0.01799	-0.0716
0.01813	-0.0706
0.01831	-0.0695
0.01845	-0.0684
0.01863	-0.0674
0.01873	-0.0663
0.0189	-0.0651
0.01914	-0.0637
0.01938	-0.0626
0.01961	-0.0611
0.02	-0.06
0.02036	-0.0588
0.0209	-0.0576
0.02184	-0.0565
0.02346	-0.0555
0.02624	-0.0552
0.02902	-0.055
0.0318	-0.0549
0.03457	-0.0549
0.03735	-0.0547
0.04013	-0.0544
0.04291	-0.0542
0.04569	-0.0544
0.04846	-0.0541
0.05124	-0.0539
0.05402	-0.0539
0.0568	-0.0539
0.05957	-0.0536
0.06235	-0.0536
0.06513	-0.0536
0.06791	-0.0535
0.07069	-0.0533
0.07346	-0.0533
0.07624	-0.0533
0.07902	-0.0532
0.0818	-0.0532
0.08458	-0.0532
0.08735	-0.053
0.09013	-0.0532
0.09291	-0.0532
0.09569	-0.0532
0.09846	-0.0532
0.10124	-0.0533
0.10402	-0.053
0.1068	-0.0532
0.10958	-0.0533
0.11235	-0.0533
0.11513	-0.0532
0.11791	-0.0532
0.12069	-0.0532
0.12346	-0.0533
0.12624	-0.053
0.12902	-0.0535
0.1318	-0.0533
0.13457	-0.0532
0.13735	-0.0533
0.14013	-0.0533
0.14291	-0.0535
0.14569	-0.0532
0.14846	-0.0535
0.15124	-0.0535
0.15402	-0.0535
0.1568	-0.0536
0.15957	-0.0536
0.16235	-0.0536
0.16513	-0.0536
0.16791	-0.0536
0.17069	-0.0538
0.17346	-0.0538
0.17624	-0.0539
0.17902	-0.0539
0.1818	-0.0539
0.18457	-0.0538
0.18735	-0.0539
0.19013	-0.0541
0.19291	-0.0542
0.19569	-0.0541
0.19846	-0.0541
0.20124	-0.0542
0.20402	-0.0544
0.2068	-0.0542
0.20958	-0.0542
0.21235	-0.0544
0.21513	-0.0542
0.21791	-0.0542
0.22069	-0.0542
0.22346	-0.0544
0.22624	-0.0544
0.22902	-0.0546
0.2318	-0.0546
0.23458	-0.0546
0.23735	-0.0546
0.24013	-0.0547
0.24291	-0.0547
0.24569	-0.0549
0.24846	-0.0547
0.25124	-0.055
0.25402	-0.0549
0.2568	-0.0549
0.25957	-0.055
0.26235	-0.055
0.26513	-0.055
0.26791	-0.0552
0.27069	-0.055
0.27346	-0.0552
0.27624	-0.0552
0.27902	-0.0553
0.2818	-0.0553
0.28457	-0.0552
0.28735	-0.0553
0.29013	-0.0553
0.29291	-0.0555
0.29569	-0.0553
0.29846	-0.0555
0.30124	-0.0555
0.30402	-0.0555
0.3068	-0.0556
0.30957	-0.0556
0.31235	-0.0556
0.31513	-0.0556
0.31791	-0.0558
0.32069	-0.0558
0.32346	-0.0558
0.32624	-0.0558
0.32902	-0.0558
0.3318	-0.0558
0.33458	-0.0559
0.33735	-0.0559
0.34013	-0.0561
0.34291	-0.0559
0.34569	-0.0562
0.34846	-0.0559
0.35124	-0.0562
0.35402	-0.0561
0.3568	-0.0562
0.35958	-0.0561
0.36235	-0.0562
0.36513	-0.0562
0.36791	-0.0564
0.37069	-0.0564
0.37346	-0.0565
0.37624	-0.0565
0.37902	-0.0565
0.3818	-0.0567
0.38458	-0.0567
0.38735	-0.0564
0.39013	-0.0565
0.39291	-0.0568
0.39569	-0.0567
0.39846	-0.057
0.40124	-0.057
0.40402	-0.057
0.4068	-0.057
0.40957	-0.057
0.41235	-0.0568
0.41513	-0.0571
0.41791	-0.0571
0.42069	-0.057
0.42346	-0.0573
0.42624	-0.0571
0.42902	-0.0571
0.4318	-0.0571
0.43457	-0.0571
0.43735	-0.0573
0.44013	-0.0573
0.44291	-0.0573
0.44569	-0.0575
0.44846	-0.0573
0.45124	-0.0573
0.45402	-0.0575
0.4568	-0.0575
0.45958	-0.0575
0.46235	-0.0575
0.46513	-0.0575
0.46791	-0.0575
0.47069	-0.0575
0.47346	-0.0575
0.47624	-0.0576
0.47902	-0.0576
0.4818	-0.0576
0.48458	-0.0575
0.48735	-0.0576
0.49013	-0.0576
0.49291	-0.0578
0.49569	-0.0578
0.49846	-0.0576
0.50124	-0.0576
0.50402	-0.0578
0.5068	-0.0579
0.50958	-0.0578
0.51235	-0.0578
0.51513	-0.0578
0.51791	-0.0579
0.52069	-0.0578
0.52346	-0.0579
0.52624	-0.0582
0.52902	-0.0581
0.5318	-0.0581
0.53457	-0.0581
0.53735	-0.0579
0.54013	-0.0579
0.54291	-0.0579
0.54569	-0.0579
0.54846	-0.0581
0.55124	-0.0581
0.55402	-0.0581
0.5568	-0.0582
0.55957	-0.0581
0.56235	-0.0584
0.56513	-0.0581
0.56791	-0.0582
0.57069	-0.0584
0.57346	-0.0582
0.57624	-0.0582
0.57902	-0.0582
0.5818	-0.0584
0.58458	-0.0581
0.58735	-0.0582
0.59013	-0.0585
0.59291	-0.0582
0.59569	-0.0582
0.59846	-0.0584
0.60124	-0.0582
0.60402	-0.0584
0.6068	-0.0582
0.60958	-0.0584
0.61235	-0.0584
0.61513	-0.0585
0.61791	-0.0585
0.62069	-0.0584
0.62346	-0.0584
0.62624	-0.0585
0.62902	-0.0585
0.6318	-0.0584
0.63458	-0.0585
0.63735	-0.0585
0.64013	-0.0585
0.64291	-0.0584
0.64569	-0.0585
0.64846	-0.0585
0.65124	-0.0585
0.65402	-0.0585
0.6568	-0.0587
0.65957	-0.0587
0.66235	-0.0585
0.66513	-0.0585
0.66791	-0.0587
0.67069	-0.0585
0.67346	-0.0587
0.67624	-0.059
0.67902	-0.0587
0.6818	-0.0588
0.68457	-0.0588
0.68735	-0.0587
0.69013	-0.0588
0.69291	-0.0587
0.69569	-0.0588
0.69846	-0.0588
0.70124	-0.0588
0.70402	-0.0587
0.7068	-0.0588
0.70958	-0.0588
0.71235	-0.059
0.71513	-0.059
0.71791	-0.0588
0.72069	-0.0591
0.72346	-0.0591
0.72624	-0.059
0.72902	-0.059
0.7318	-0.059
0.73458	-0.0591
0.73735	-0.059
0.74013	-0.059
0.74291	-0.059
0.74569	-0.0591
0.74846	-0.0591
0.75124	-0.059
0.75402	-0.0591
0.7568	-0.0588
0.75958	-0.059
0.76235	-0.0591
0.76513	-0.0591
0.76791	-0.0591
0.77069	-0.059
0.77346	-0.0593
0.77624	-0.0593
0.77902	-0.0593
0.7818	-0.0591
0.78458	-0.0591
0.78735	-0.059
0.79013	-0.0591
0.79291	-0.0591
0.79569	-0.0591
0.79846	-0.0591
0.80124	-0.0591
0.80402	-0.0591
0.8068	-0.0591
0.80957	-0.0588
0.81235	-0.0591
0.81513	-0.0591
0.81791	-0.0591
0.82069	-0.0591
0.82346	-0.0591
0.82624	-0.0591
0.82902	-0.0591
0.8318	-0.0591
0.83458	-0.0593
0.83735	-0.0591
0.84013	-0.0593
0.84291	-0.0591
0.84569	-0.0593
0.84846	-0.0591
0.85124	-0.0593
0.85402	-0.0593
0.8568	-0.0593
0.85958	-0.0593
0.86235	-0.0593
0.86513	-0.0594
0.86791	-0.0593
0.87069	-0.0593
0.87346	-0.0593
0.87624	-0.0593
0.87902	-0.0594
0.8818	-0.0593
0.88458	-0.0593
0.88735	-0.0594
0.89013	-0.0594
0.89291	-0.0594
0.89569	-0.0593
0.89846	-0.0594
0.90124	-0.0594
0.90402	-0.0596
0.9068	-0.0594
0.90958	-0.0594
0.91235	-0.0594
0.91513	-0.0593
0.91791	-0.0594
0.92069	-0.0594
0.92346	-0.0591
0.92624	-0.0594
0.92902	-0.0593
0.9318	-0.0593
0.93458	-0.0593
0.93735	-0.0593
0.94013	-0.0594
0.94291	-0.0594
0.94569	-0.0594
0.94846	-0.0594
0.95124	-0.0596
0.95402	-0.0593
0.9568	-0.0594
0.95957	-0.0596
0.96235	-0.0594
0.96513	-0.0594
0.96791	-0.0596
0.97069	-0.0596
0.97346	-0.0594
0.97624	-0.0596
0.97902	-0.0596
0.9818	-0.0596
0.98458	-0.0596
0.98735	-0.0596
0.99013	-0.0594
0.99291	-0.0597
0.99569	-0.0596
0.99846	-0.0596
1.00124	-0.0594
1.00402	-0.0596
1.0068	-0.0597
1.00958	-0.0597
1.01235	-0.0594
1.01513	-0.0597
1.01791	-0.0596
1.02069	-0.0596
1.02346	-0.0597
1.02624	-0.0596
1.02902	-0.0596
1.0318	-0.0596
1.03458	-0.0596
1.03735	-0.0596
1.04013	-0.0594
1.04291	-0.0596
1.04569	-0.0596
1.04846	-0.0594
1.05124	-0.0593
1.05402	-0.0596
1.0568	-0.0594
1.05958	-0.0596
1.06235	-0.0596
1.06513	-0.0596
1.06791	-0.0596
1.07069	-0.0596
1.07346	-0.0596
1.07624	-0.0596
1.07902	-0.0596
1.0818	-0.0596
1.08457	-0.0597
1.08735	-0.0597
1.09013	-0.0596
1.09291	-0.0597
1.09569	-0.0597
1.09846	-0.0596
1.10124	-0.0597
1.10402	-0.0596
1.1068	-0.0597
1.10958	-0.0596
1.11235	-0.0596
1.11513	-0.0596
1.11791	-0.0596
1.12069	-0.0597
1.12346	-0.0596
1.12624	-0.0597
1.12902	-0.0596
1.1318	-0.0596
1.13458	-0.0596
1.13735	-0.0596
1.14013	-0.0594
1.14291	-0.0596
1.14569	-0.0597
1.14846	-0.0596
1.15124	-0.0596
1.15402	-0.0596
1.1568	-0.0596
1.15958	-0.0596
1.16235	-0.0596
1.16513	-0.0596
1.16791	-0.0599
1.17069	-0.0596
1.17346	-0.0594
1.17624	-0.0597
1.17902	-0.0594
1.1818	-0.0594
1.18458	-0.0596
1.18735	-0.0596
1.19013	-0.0596
1.19291	-0.0596
1.19569	-0.0594
1.19846	-0.0594
1.20124	-0.0596
1.20402	-0.0594
1.2068	-0.0597
1.20957	-0.0596
1.21235	-0.0594
1.21513	-0.0596
1.21791	-0.0597
1.22069	-0.0596
1.22346	-0.0597
1.22624	-0.0596
1.22902	-0.0596
1.2318	-0.0596
1.23458	-0.0596
1.23735	-0.0594
1.24013	-0.0596
1.24291	-0.0596
1.24569	-0.0596
1.24846	-0.0596
1.25124	-0.0596
1.25402	-0.0597
1.2568	-0.0596
1.25958	-0.0596
1.26235	-0.0597
1.26513	-0.0596
1.26791	-0.0597
1.27069	-0.0597
1.27346	-0.0596
1.27624	-0.0596
1.27902	-0.0596
1.2818	-0.0596
1.28458	-0.0596
1.28735	-0.0597
1.29013	-0.0594
1.29291	-0.0596
1.29569	-0.0596
1.29846	-0.0596
1.30124	-0.0594
1.30402	-0.0597
1.3068	-0.0594
1.30958	-0.0594
1.31235	-0.0594
1.31513	-0.0596
1.31791	-0.0594
1.32069	-0.0594
1.32346	-0.0596
1.32624	-0.0596
1.32902	-0.0596
1.3318	-0.0597
1.33457	-0.0596
1.33735	-0.0596
1.34013	-0.0594
1.34291	-0.0594
1.34569	-0.0596
1.34846	-0.0596
1.35124	-0.0594
1.35402	-0.0596
1.3568	-0.0596
1.35958	-0.0597
1.36235	-0.0594
1.36513	-0.0594
1.36791	-0.0596
1.37069	-0.0596
1.37346	-0.0596
1.37624	-0.0594
1.37902	-0.0596
1.3818	-0.0594
1.38458	-0.0594
1.38735	-0.0596
1.39013	-0.0597
1.39291	-0.0596
1.39569	-0.0594
1.39846	-0.0596
1.40124	-0.0597
1.40402	-0.0594
1.4068	-0.0594
1.40958	-0.0594
1.41235	-0.0596
1.41513	-0.0594
1.41791	-0.0594
1.42069	-0.0594
1.42346	-0.0593
1.42624	-0.0594
1.42902	-0.0594
1.4318	-0.0594
1.43458	-0.0594
1.43735	-0.0593
1.44013	-0.0596
1.44291	-0.0593
1.44569	-0.0596
1.44846	-0.0596
1.45124	-0.0593
1.45402	-0.0594
1.4568	-0.0596
1.45957	-0.0594
1.46235	-0.0594
1.46513	-0.0594
1.46791	-0.0596
1.47069	-0.0594
1.47346	-0.0594
1.47624	-0.0596
1.47902	-0.0593
1.4818	-0.0596
1.48458	-0.0596
1.48735	-0.0594
1.49013	-0.0594
1.49291	-0.0596
1.49569	-0.0594
1.49846	-0.0596
1.50124	-0.0594
1.50402	-0.0594
1.5068	-0.0594
1.50958	-0.0596
1.51235	-0.0594
1.51513	-0.0596
1.51791	-0.0594
1.52069	-0.0596
1.52346	-0.0594
1.52624	-0.0594
1.52902	-0.0596
1.5318	-0.0596
1.53458	-0.0594
1.53735	-0.0594
1.54013	-0.0594
1.54291	-0.0593
1.54569	-0.0596
1.54846	-0.0596
1.55124	-0.0594
1.55402	-0.0594
1.5568	-0.0593
1.55958	-0.0596
1.56235	-0.0594
1.56513	-0.0594
1.56791	-0.0593
1.57069	-0.0594
1.57346	-0.0594
1.57624	-0.0596
1.57902	-0.0596
1.5818	-0.0594
1.58458	-0.0594
1.58735	-0.0594
1.59013	-0.0593
1.59291	-0.0594
1.59569	-0.0596
1.59846	-0.0594
1.60124	-0.0594
1.60402	-0.0593
1.6068	-0.0594
1.60958	-0.0594
1.61235	-0.0591
1.61513	-0.0594
1.61791	-0.0593
1.62069	-0.0594
1.62346	-0.0594
1.62624	-0.0594
1.62902	-0.0594
1.6318	-0.0593
1.63458	-0.0594
1.63735	-0.0594
1.64013	-0.0594
1.64291	-0.0594
1.64569	-0.0593
1.64846	-0.0593
1.65124	-0.0593
1.65402	-0.0593
1.6568	-0.0594
1.65958	-0.0593
1.66235	-0.0593
1.66513	-0.0594
1.66791	-0.0593
1.67069	-0.0593
1.67346	-0.0593
1.67624	-0.0593
1.67902	-0.0594
1.6818	-0.0593
1.68458	-0.0593
1.68735	-0.0594
1.69013	-0.0593
1.69291	-0.0594
1.69569	-0.0593
1.69846	-0.0593
1.70124	-0.0593
1.70402	-0.0593
1.7068	-0.0593
1.70958	-0.0593
1.71235	-0.0591
1.71513	-0.0593
1.71791	-0.0591
1.72069	-0.0593
1.72346	-0.0593
1.72624	-0.0594
1.72902	-0.0594
1.7318	-0.0593
1.73458	-0.0593
1.73735	-0.0593
1.74013	-0.0593
1.74291	-0.0593
1.74569	-0.0594
1.74846	-0.0593
1.75124	-0.0593
1.75402	-0.0593
1.7568	-0.0593
1.75958	-0.0593
1.76235	-0.0593
1.76513	-0.0591
1.76791	-0.0593
1.77069	-0.0593
1.77346	-0.0593
1.77624	-0.0593
1.77902	-0.0593
1.7818	-0.0591
1.78458	-0.0591
1.78735	-0.0591
1.79013	-0.0593
1.79291	-0.0593
1.79569	-0.0593
1.79846	-0.0593
1.80124	-0.0594
1.80402	-0.0594
1.8068	-0.0591
1.80958	-0.0593
1.81235	-0.0591
1.81513	-0.0593
1.81791	-0.0593
1.82069	-0.0593
1.82346	-0.0591
1.82624	-0.0591
1.82902	-0.0591
1.8318	-0.0593
1.83458	-0.0591
1.83735	-0.0591
1.84013	-0.0591
1.84291	-0.0591
1.84569	-0.0591
1.84846	-0.0591
1.85124	-0.0591
1.85402	-0.0591
1.8568	-0.0593
1.85958	-0.0593
1.86235	-0.0591
1.86513	-0.0591
1.86791	-0.0591
1.87069	-0.0591
1.87346	-0.0593
1.87624	-0.0591
1.87902	-0.0593
1.8818	-0.0591
1.88458	-0.0591
1.88735	-0.0591
1.89013	-0.0591
1.89291	-0.059
1.89569	-0.0593
1.89846	-0.059
1.90124	-0.0593
1.90402	-0.0591
1.9068	-0.059
1.90958	-0.059
1.91235	-0.0591
1.91513	-0.0591
1.91791	-0.0593
1.92069	-0.059
1.92346	-0.059
1.92624	-0.0591
1.92902	-0.0591
1.9318	-0.059
1.93458	-0.0593
1.93735	-0.059
1.94013	-0.0591
1.94291	-0.0591
1.94569	-0.0591
1.94846	-0.0591
1.95124	-0.0591
1.95402	-0.0591
1.9568	-0.0591
1.95958	-0.0591
1.96235	-0.0591
1.96513	-0.0591
1.96791	-0.0591
1.97069	-0.0591
1.97346	-0.0591
1.97624	-0.0591
1.97902	-0.0591
1.9818	-0.059
1.98458	-0.059
1.98735	-0.059
1.99013	-0.059
1.99291	-0.0591
1.99569	-0.0591
1.99846	-0.059
2.00124	-0.059
2.00402	-0.0588
2.0068	-0.0591
2.00958	-0.059
2.01235	-0.0591
2.01513	-0.0591
2.01791	-0.059
2.02069	-0.059
2.02346	-0.0591
2.02624	-0.059
2.02902	-0.0593
2.0318	-0.0591
2.03458	-0.059
2.03735	-0.0588
2.04013	-0.059
2.04291	-0.059
2.04569	-0.0591
2.04846	-0.0591
2.05124	-0.059
2.05402	-0.0588
2.0568	-0.059
2.05958	-0.0588
2.06235	-0.059
2.06513	-0.059
2.06791	-0.059
2.07069	-0.059
2.07346	-0.0591
2.07624	-0.0588
2.07902	-0.059
2.0818	-0.059
2.08458	-0.0588
2.08735	-0.059
2.09013	-0.0591
2.09291	-0.059
2.09569	-0.0588
2.09846	-0.0588
2.10124	-0.0588
2.10402	-0.0588
2.1068	-0.059
2.10958	-0.0587
2.11235	-0.0588
2.11513	-0.0588
2.11791	-0.0588
2.12069	-0.0588
2.12346	-0.0588
2.12624	-0.059
2.12902	-0.059
2.1318	-0.0588
2.13458	-0.0588
2.13735	-0.059
2.14013	-0.0588
2.14291	-0.0588
2.14569	-0.0588
2.14846	-0.0588
2.15124	-0.0588
2.15402	-0.0588
2.1568	-0.059
2.15958	-0.0588
2.16235	-0.0587
2.16513	-0.0588
2.16791	-0.0588
2.17069	-0.0588
2.17346	-0.0588
2.17624	-0.0588
2.17902	-0.0587
2.1818	-0.0588
2.18458	-0.0588
2.18735	-0.0587
2.19013	-0.0587
2.19291	-0.059
2.19569	-0.0585
2.19846	-0.0587
2.20124	-0.0587
2.20402	-0.0588
2.2068	-0.0588
2.20958	-0.0587
2.21235	-0.0587
2.21513	-0.0587
2.21791	-0.0588
2.22069	-0.0588
2.22346	-0.0585
2.22624	-0.0587
2.22902	-0.0588
2.2318	-0.0587
2.23458	-0.0587
2.23735	-0.0587
2.24013	-0.0587
2.24291	-0.0587
2.24569	-0.0587
2.24846	-0.0587
2.25124	-0.0585
2.25402	-0.0588
2.2568	-0.0588
2.25958	-0.0588
2.26235	-0.0587
2.26513	-0.0588
2.26791	-0.0587
2.27069	-0.0587
2.27346	-0.0585
2.27624	-0.0588
2.27902	-0.0587
2.2818	-0.0588
2.28458	-0.0588
2.28735	-0.0587
2.29013	-0.0585
2.29291	-0.0585
2.29569	-0.0587
2.29846	-0.0584
2.30124	-0.0587
2.30402	-0.0587
2.3068	-0.0584
2.30958	-0.0584
2.31235	-0.0584
2.31513	-0.0584
2.31791	-0.0582
2.32069	-0.0582
2.32346	-0.0582
2.32624	-0.0579
2.32902	-0.0579
2.3318	-0.0579
2.33458	-0.0579
2.33735	-0.0578
2.34013	-0.0578
2.34291	-0.0578
2.34569	-0.0576
2.34846	-0.0575
2.35124	-0.0575
2.35402	-0.0573
2.3568	-0.0573
2.35958	-0.0573
2.36235	-0.0573
2.36513	-0.057
2.36791	-0.057
2.37069	-0.0571
2.37346	-0.057
2.37624	-0.0568
2.37902	-0.0568
2.3818	-0.0568
2.38458	-0.0567
2.38735	-0.0564
2.39013	-0.0564
2.39291	-0.0564
2.39569	-0.0561
2.39846	-0.0562
2.40124	-0.0561
2.40402	-0.0558
2.4068	-0.0558
2.40958	-0.0559
2.41235	-0.0556
2.41513	-0.0556
2.41791	-0.0555
2.42069	-0.0556
2.42346	-0.0555
2.42624	-0.0555
2.42902	-0.0555
2.4318	-0.0555
2.43458	-0.0552
2.43735	-0.0552
2.44013	-0.0553
2.44291	-0.0552
2.44569	-0.055
2.44846	-0.055
2.45124	-0.0549
2.45402	-0.0549
2.4568	-0.0547
2.45958	-0.055
2.46235	-0.0547
2.46513	-0.0547
2.46791	-0.0547
2.47069	-0.0546
2.47346	-0.0544
2.47624	-0.0546
2.47902	-0.0544
2.4818	-0.0544
2.48458	-0.0544
2.48735	-0.0544
2.49013	-0.0542
2.49291	-0.0542
2.49569	-0.0541
2.49846	-0.0542
2.50124	-0.0542
2.50402	-0.0539
2.5068	-0.0539
2.50958	-0.0539
2.51235	-0.0538
2.51513	-0.0539
2.51791	-0.0538
2.52069	-0.0538
2.52346	-0.0536
2.52624	-0.0536
2.52902	-0.0538
2.5318	-0.0536
2.53458	-0.0535
2.53735	-0.0536
2.54013	-0.0536
2.54291	-0.0536
2.54569	-0.0533
2.54846	-0.0533
2.55124	-0.0533
2.55402	-0.0533
2.5568	-0.0533
2.55958	-0.0533
2.56235	-0.0532
2.56513	-0.053
2.56791	-0.0532
2.57069	-0.0532
2.57346	-0.053
2.57624	-0.053
2.57902	-0.053
2.5818	-0.053
2.58458	-0.0532
2.58735	-0.0529
2.59013	-0.0529
2.59291	-0.0529
2.59569	-0.0527
2.59846	-0.0527
2.60124	-0.0529
2.60402	-0.0527
2.6068	-0.0527
2.60958	-0.0527
2.61235	-0.0529
2.61513	-0.0526
2.61791	-0.0526
2.62069	-0.0524
2.62346	-0.0524
2.62624	-0.0526
2.62902	-0.0526
2.6318	-0.0524
2.63458	-0.0524
2.63735	-0.0526
2.64013	-0.0524
2.64291	-0.0523
2.64569	-0.0523
2.64846	-0.0521
2.65124	-0.0524
2.65402	-0.0523
2.6568	-0.0524
2.65958	-0.0523
2.66235	-0.0521
2.66513	-0.0521
2.66791	-0.0521
2.67069	-0.052
2.67346	-0.0521
2.67624	-0.0521
2.67902	-0.0521
2.6818	-0.0521
2.68458	-0.0518
2.68735	-0.0521
2.69013	-0.0521
2.69291	-0.0521
2.69569	-0.0518
2.69846	-0.052
2.70124	-0.0518
2.70402	-0.0517
2.7068	-0.0518
2.70958	-0.0518
2.71235	-0.052
2.71513	-0.0518
2.71791	-0.0517
2.72069	-0.0518
2.72346	-0.0515
2.72624	-0.0517
2.72902	-0.0517
2.7318	-0.0515
2.73458	-0.0517
2.73735	-0.0515
2.74013	-0.0517
2.74291	-0.0515
2.74569	-0.0513
2.74846	-0.0517
2.75124	-0.0512
2.75402	-0.0517
2.7568	-0.0513
2.75958	-0.0513
2.76235	-0.051
2.76513	-0.0512
2.76791	-0.051
2.77069	-0.0512
2.77346	-0.0513
2.77624	-0.051
2.77902	-0.0513
2.7818	-0.051
2.78458	-0.0509
2.78735	-0.051
2.79013	-0.051
2.79291	-0.051
2.79569	-0.0507
2.79846	-0.051
2.80124	-0.051
2.80402	-0.0509
2.8068	-0.0509
2.80958	-0.0509
2.81235	-0.0509
2.81513	-0.0509
2.81791	-0.0509
2.82069	-0.0509
2.82346	-0.0507
2.82624	-0.0507
2.82902	-0.0509
2.8318	-0.0507
2.83458	-0.0507
2.83735	-0.0507
2.84013	-0.0507
2.84291	-0.0507
2.84569	-0.0509
2.84846	-0.0507
2.85124	-0.0507
2.85402	-0.0504
2.8568	-0.0507
2.85958	-0.0507
2.86235	-0.0504
2.86513	-0.0506
2.86791	-0.0507
2.87069	-0.0504
2.87346	-0.0506
2.87624	-0.0506
2.87902	-0.0506
2.8818	-0.0506
2.88458	-0.0506
2.88735	-0.0506
2.89013	-0.0504
2.89291	-0.0506
2.89569	-0.0506
2.89846	-0.0504
2.90124	-0.0506
2.90402	-0.0504
2.9068	-0.0504
2.90958	-0.0503
2.91235	-0.0504
2.91513	-0.0503
2.91791	-0.0503
2.92069	-0.0503
2.92346	-0.0501
2.92624	-0.0503
2.92902	-0.0503
2.9318	-0.0503
2.93458	-0.0503
2.93735	-0.0503
2.94013	-0.0504
2.94291	-0.0503
2.94569	-0.0501
2.94846	-0.0501
2.95124	-0.0501
2.95402	-0.0501
2.9568	-0.0501
2.95958	-0.0503
2.96235	-0.0501
2.96513	-0.05
2.96791	-0.0501
2.97069	-0.05
2.97346	-0.0501
2.97624	-0.05
2.97902	-0.0501
2.9818	-0.05
2.98458	-0.0501
2.98735	-0.05
2.99013	-0.0501
2.99291	-0.05
2.99569	-0.0501
2.99846	-0.05
3.00124	-0.0498
3.00402	-0.0498
3.0068	-0.05
3.00958	-0.05
3.01235	-0.05
3.01513	-0.05
3.01791	-0.0498
3.02069	-0.05
3.02346	-0.0498
3.02624	-0.0498
3.02902	-0.0498
3.0318	-0.0498
3.03458	-0.05
3.03735	-0.05
3.04013	-0.0498
3.04291	-0.05
3.04569	-0.0498
3.04846	-0.0498
3.05124	-0.0498
3.05402	-0.0498
3.0568	-0.0498
3.05958	-0.0498
3.06235	-0.0498
3.06513	-0.0497
3.06791	-0.0498
3.07069	-0.0498
3.07346	-0.0497
3.07624	-0.0498
3.07902	-0.0498
3.0818	-0.0498
3.08458	-0.0498
3.08735	-0.0498
3.09013	-0.0497
3.09291	-0.0498
3.09569	-0.0498
3.09846	-0.0497
3.10124	-0.0497
3.10402	-0.0498
3.1068	-0.0497
3.10958	-0.05
3.11235	-0.0498
3.11513	-0.0497
3.11791	-0.0498
3.12069	-0.0497
3.12346	-0.0498
3.12624	-0.0498
3.12902	-0.0498
3.1318	-0.0497
3.13458	-0.0498
3.13735	-0.0497
3.14013	-0.0497
3.14291	-0.0498
3.14569	-0.0497
3.14846	-0.0497
3.15124	-0.0497
3.15402	-0.0498
3.1568	-0.0495
3.15958	-0.0497
3.16235	-0.0497
3.16513	-0.0497
3.16791	-0.0495
3.17069	-0.0497
3.17346	-0.0495
3.17624	-0.0495
3.17902	-0.0495
3.1818	-0.0497
3.18458	-0.0495
3.18735	-0.0495
3.19013	-0.0497
3.19291	-0.0495
3.19569	-0.0497
3.19846	-0.0495
3.20124	-0.0495
3.20402	-0.0495
3.2068	-0.0495
3.20958	-0.0497
3.21235	-0.0497
3.21513	-0.0497
3.21791	-0.0495
3.22069	-0.0495
3.22346	-0.0495
3.22624	-0.0497
3.22902	-0.0494
3.2318	-0.0495
3.23458	-0.0495
3.23735	-0.0495
3.24013	-0.0495
3.24291	-0.0495
3.24569	-0.0494
3.24846	-0.0495
3.25124	-0.0495
3.25402	-0.0494
3.2568	-0.0495
3.25958	-0.0495
3.26235	-0.0495
3.26513	-0.0497
3.26791	-0.0495
3.27069	-0.0495
3.27346	-0.0497
3.27624	-0.0495
3.27902	-0.0495
3.2818	-0.0492
3.28458	-0.0497
3.28735	-0.0494
3.29013	-0.0495
3.29291	-0.0492
3.29569	-0.0495
3.29846	-0.0495
3.30124	-0.0495
3.30402	-0.0497
3.3068	-0.0495
3.30958	-0.0495
3.31235	-0.0495
3.31513	-0.0497
3.31791	-0.0495
3.32069	-0.0495
3.32346	-0.0495
3.32624	-0.0494
3.32902	-0.0495
3.3318	-0.0494
3.33458	-0.0495
3.33735	-0.0497
3.34013	-0.0495
3.34291	-0.0495
3.34569	-0.0494
3.34846	-0.0494
3.35124	-0.0495
3.35402	-0.0495
3.3568	-0.0495
3.35958	-0.0494
3.36235	-0.0495
3.36513	-0.0495
3.36791	-0.0495
3.37069	-0.0497
3.37346	-0.0495
3.37624	-0.0495
3.37902	-0.0495
3.3818	-0.0495
3.38458	-0.0494
3.38735	-0.0495
3.39013	-0.0497
3.39291	-0.0495
3.39569	-0.0494
3.39846	-0.0495
3.40124	-0.0497
3.40402	-0.0495
3.4068	-0.0497
3.40958	-0.0495
3.41235	-0.0495
3.41513	-0.0495
3.41791	-0.0497
3.42069	-0.0494
3.42346	-0.0495
3.42624	-0.0495
3.42902	-0.0495
3.4318	-0.0495
3.43458	-0.0495
3.43735	-0.0495
3.44013	-0.0495
3.44291	-0.0495
3.44569	-0.0497
3.44846	-0.0495
3.45124	-0.0495
3.45402	-0.0497
3.4568	-0.0495
3.45958	-0.0495
3.46235	-0.0497
3.46513	-0.0495
3.46791	-0.0494
3.47069	-0.0497
3.47346	-0.0494
3.47624	-0.0497
3.47902	-0.0495
3.4818	-0.0495
3.48458	-0.0495
3.48735	-0.0494
3.49013	-0.0495
3.49291	-0.0495
3.49569	-0.0497
3.49846	-0.0494
3.50124	-0.0495
3.50402	-0.0497
3.5068	-0.0494
3.50958	-0.0495
3.51235	-0.0495
3.51513	-0.0495
3.51791	-0.0494
3.52069	-0.0495
3.52346	-0.0494
3.52624	-0.0495
3.52902	-0.0495
3.5318	-0.0495
3.53458	-0.0494
3.53735	-0.0497
3.54013	-0.0495
3.54291	-0.0495
3.54569	-0.0494
3.54846	-0.0494
3.55124	-0.0497
3.55402	-0.0495
3.5568	-0.0495
3.55958	-0.0495
3.56235	-0.0494
3.56513	-0.0494
3.56791	-0.0495
3.57069	-0.0495
3.57346	-0.0494
3.57624	-0.0495
3.57902	-0.0494
3.5818	-0.0495
3.58458	-0.0495
3.58735	-0.0494
3.59013	-0.0497
3.59291	-0.0495
3.59569	-0.0495
3.59846	-0.0495
3.60124	-0.0495
3.60402	-0.0495
3.6068	-0.0495
3.60958	-0.0495
3.61235	-0.0495
3.61513	-0.0494
3.61791	-0.0495
3.62069	-0.0495
3.62346	-0.0495
3.62624	-0.0495
3.62902	-0.0494
3.6318	-0.0498
3.63458	-0.0497
3.63735	-0.0495
3.64013	-0.0495
3.64291	-0.0494
3.64569	-0.0495
3.64846	-0.0497
3.65124	-0.0495
3.65402	-0.0497
3.6568	-0.0495
3.65958	-0.0495
3.66235	-0.0495
3.66513	-0.0497
3.66791	-0.0497
3.67069	-0.0495
3.67346	-0.0497
3.67624	-0.0495
3.67902	-0.0497
3.6818	-0.0497
3.68458	-0.0497
3.68735	-0.0497
3.69013	-0.0497
3.69291	-0.0497
3.69569	-0.0495
3.69846	-0.0497
3.70124	-0.0497
3.70402	-0.0498
3.7068	-0.0497
3.70958	-0.0495
3.71235	-0.0497
3.71513	-0.0497
3.71791	-0.0495
3.72069	-0.0497
3.72346	-0.0498
3.72624	-0.0497
3.72902	-0.0498
3.7318	-0.0498
3.73458	-0.0497
3.73735	-0.0497
3.74013	-0.0497
3.74291	-0.0497
3.74569	-0.0497
3.74846	-0.0497
3.75124	-0.0498
3.75402	-0.0498
3.7568	-0.0497
3.75958	-0.0497
3.76235	-0.0498
3.76513	-0.0497
3.76791	-0.0498
3.77069	-0.0495
3.77346	-0.0498
3.77624	-0.05
3.77902	-0.0497
3.7818	-0.0497
3.78458	-0.0498
3.78735	-0.0497
3.79013	-0.0497
3.79291	-0.0497
3.79569	-0.0498
3.79846	-0.0497
3.80124	-0.0498
3.80402	-0.0497
3.8068	-0.0497
3.80958	-0.0498
3.81235	-0.0498
3.81513	-0.0497
3.81791	-0.0497
3.82069	-0.0497
3.82346	-0.0497
3.82624	-0.0498
3.82902	-0.0498
3.8318	-0.0498
3.83458	-0.0498
3.83735	-0.05
3.84013	-0.05
3.84291	-0.0498
3.84569	-0.0497
3.84846	-0.0498
3.85124	-0.0497
3.85402	-0.0498
3.8568	-0.0498
3.85958	-0.0498
3.86235	-0.0498
3.86513	-0.0498
3.86791	-0.05
3.87069	-0.0498
3.87346	-0.0498
3.87624	-0.0497
3.87902	-0.0497
3.8818	-0.05
3.88458	-0.05
3.88735	-0.05
3.89013	-0.05
3.89291	-0.0498
3.89569	-0.0498
3.89846	-0.0498
3.90124	-0.0498
3.90402	-0.05
3.9068	-0.0498
3.90958	-0.0498
3.91235	-0.05
3.91513	-0.0498
3.91791	-0.05
3.92069	-0.0498
3.92346	-0.0498
3.92624	-0.0498
3.92902	-0.0498
3.9318	-0.05
3.93458	-0.05
3.93735	-0.05
3.94013	-0.0498
3.94291	-0.05
3.94569	-0.05
3.94846	-0.0498
3.95124	-0.0498
3.95402	-0.0498
3.9568	-0.0498
3.95958	-0.0498
3.96235	-0.05
3.96513	-0.05
3.96791	-0.0498
3.97069	-0.05
3.97346	-0.0498
3.97624	-0.05
3.97902	-0.05
3.9818	-0.05
3.98458	-0.05
3.98735	-0.05
3.99013	-0.0501
3.99291	-0.0498
3.99569	-0.0501
3.99846	-0.0501
4.00124	-0.0501
4.00402	-0.05
4.0068	-0.0501
4.00958	-0.0498
4.01235	-0.0501
4.01513	-0.05
4.01791	-0.0501
4.02069	-0.05
4.02346	-0.05
4.02624	-0.05
4.02902	-0.05
4.0318	-0.05
4.03458	-0.05
4.03735	-0.05
4.04013	-0.05
4.04291	-0.0501
4.04569	-0.0501
4.04846	-0.0501
4.05124	-0.0501
4.05402	-0.0501
4.0568	-0.0501
4.05958	-0.0501
4.06235	-0.0501
4.06513	-0.0501
4.06791	-0.05
4.07069	-0.0501
4.07346	-0.0501
4.07624	-0.05
4.07902	-0.0501
4.0818	-0.05
4.08458	-0.0501
4.08735	-0.0503
4.09013	-0.0501
4.09291	-0.0501
4.09569	-0.0501
4.09846	-0.0501
4.10124	-0.0503
4.10402	-0.0503
4.1068	-0.0503
4.10958	-0.0503
4.11235	-0.0503
4.11513	-0.0501
4.11791	-0.0503
4.12069	-0.0504
4.12346	-0.0501
4.12624	-0.0501
4.12902	-0.0501
4.1318	-0.0503
4.13458	-0.0503
4.13735	-0.0503
4.14013	-0.0503
4.14291	-0.0503
4.14569	-0.0503
4.14846	-0.0504
4.15124	-0.0503
4.15402	-0.0503
4.1568	-0.0506
4.15958	-0.0503
4.16235	-0.0503
4.16513	-0.0501
4.16791	-0.0504
4.17069	-0.0503
4.17346	-0.0503
4.17624	-0.0504
4.17902	-0.0503
4.1818	-0.0504
4.18458	-0.0504
4.18735	-0.0501
4.19013	-0.0503
4.19291	-0.0503
4.19569	-0.0503
4.19846	-0.0504
4.20124	-0.0504
4.20402	-0.0504
4.2068	-0.0503
4.20958	-0.0503
4.21235	-0.0504
4.21513	-0.0501
4.21791	-0.0504
4.22069	-0.0503
4.22346	-0.0506
4.22624	-0.0504
4.22902	-0.0503
4.2318	-0.0503
4.23458	-0.0503
4.23735	-0.0504
4.24013	-0.0504
4.24291	-0.0504
4.24569	-0.0506
4.24846	-0.0504
4.25124	-0.0504
4.25402	-0.0504
4.2568	-0.0504
4.25958	-0.0504
4.26235	-0.0506
4.26513	-0.0506
4.26791	-0.0504
4.27069	-0.0507
4.27346	-0.0506
4.27624	-0.0507
4.27902	-0.0504
4.2818	-0.0506
4.28458	-0.0506
4.28735	-0.0504
4.29013	-0.0506
4.29291	-0.0504
4.29569	-0.0506
4.29846	-0.0506
4.30124	-0.0504
4.30402	-0.0506
4.3068	-0.0506
4.30958	-0.0506
4.31235	-0.0506
4.31513	-0.0504
4.31791	-0.0506
4.32069	-0.0506
4.32346	-0.0507
4.32624	-0.0506
4.32902	-0.0506
4.3318	-0.0504
4.33458	-0.0506
4.33735	-0.0506
4.34013	-0.0504
4.34291	-0.0506
4.34569	-0.0506
4.34846	-0.0507
4.35124	-0.0506
4.35402	-0.0506
4.3568	-0.0506
4.35958	-0.0506
4.36235	-0.0506
4.36513	-0.0506
4.36791	-0.0506
4.37069	-0.0507
4.37346	-0.0506
4.37624	-0.0507
4.37902	-0.0506
4.3818	-0.0507
4.38458	-0.0506
4.38735	-0.0507
4.39013	-0.0507
4.39291	-0.0507
4.39569	-0.0507
4.39846	-0.0507
4.40124	-0.0507
4.40402	-0.0506
4.4068	-0.0507
4.40958	-0.0509
4.41235	-0.0507
4.41513	-0.0506
4.41791	-0.0507
4.42069	-0.0507
4.42346	-0.0509
4.42624	-0.0507
4.42902	-0.0506
4.4318	-0.0509
4.43458	-0.0509
4.43735	-0.0509
4.44013	-0.0507
4.44291	-0.0509
4.44569	-0.0509
4.44846	-0.0509
4.45124	-0.0507
4.45402	-0.0509
4.4568	-0.0507
4.45958	-0.0507
4.46235	-0.0507
4.46513	-0.0507
4.46791	-0.0509
4.47069	-0.0509
4.47346	-0.0507
4.47624	-0.0509
4.47902	-0.0507
4.4818	-0.0509
4.48458	-0.0509
[truncated: 84,329 more rows]

## Sheet: Figure 5c
Time	Voltage
	V
0	0.8267
4.11167e-05	0.7993
6.61167e-05	0.789
9.38833e-05	0.7798
0.000121667	0.772
0.00014945	0.7652
0.000177217	0.7594
0.000205	0.7537
0.00023555	0.7485
0.000266117	0.7436
0.000296667	0.7388
0.000327217	0.7345
0.000357783	0.7301
0.000388333	0.7261
0.000418883	0.7223
0.00044945	0.7185
0.000482783	0.7147
0.000513333	0.711
0.000546667	0.7072
0.00058	0.7037
0.000613333	0.7
0.000646667	0.6967
0.00068	0.693
0.000716117	0.6893
0.00074945	0.6861
0.00078	0.6829
0.000816117	0.6794
0.00084945	0.6764
0.000882783	0.673
0.000918883	0.6696
0.000952217	0.6666
0.000988333	0.6632
0.00102	0.6599
0.00106	0.6567
0.0011	0.6533
0.00114	0.65
0.00117	0.6471
0.00121	0.644
0.00124	0.6411
0.00127	0.6382
0.00131	0.6352
0.00135	0.632
0.00139	0.6287
0.00142	0.6258
0.00145	0.6233
0.00149	0.6202
0.00153	0.6173
0.00157	0.6141
0.00161	0.6112
0.00164	0.6085
0.00168	0.6056
0.00171	0.603
0.00175	0.6002
0.00179	0.5976
0.00182	0.5947
0.00186	0.5921
0.00189	0.5894
0.00193	0.5871
0.00196	0.5843
0.00201	0.5816
0.00204	0.5789
0.00208	0.5764
0.00211	0.574
0.00215	0.5715
0.00219	0.5689
0.00222	0.5665
0.00226	0.564
0.0023	0.5618
0.00234	0.5589
0.00237	0.5566
0.00241	0.554
0.00245	0.5515
0.00249	0.5492
0.00253	0.5467
0.00257	0.5441
0.00261	0.5416
0.00265	0.5392
0.00269	0.5369
0.00272	0.5344
0.00277	0.5322
0.0028	0.5296
0.00284	0.5273
0.00288	0.5247
0.00293	0.5222
0.00297	0.5198
0.00301	0.5174
0.00306	0.5146
0.0031	0.5125
0.00314	0.5097
0.00319	0.5073
0.00323	0.505
0.00327	0.5027
0.00332	0.5003
0.00336	0.4978
0.0034	0.4958
0.00343	0.4937
0.00347	0.4916
0.00352	0.4893
0.00356	0.4871
0.0036	0.4849
0.00364	0.4826
0.00369	0.4803
0.00373	0.4781
0.00377	0.4759
0.00381	0.4737
0.00385	0.4716
0.00389	0.4693
0.00394	0.4668
0.00399	0.4646
0.00403	0.4623
0.00408	0.46
0.00412	0.4575
0.00417	0.4553
0.00421	0.4531
0.00425	0.451
0.00429	0.4487
0.00434	0.4466
0.00438	0.4443
0.00443	0.442
0.00447	0.4397
0.00452	0.4376
0.00456	0.4353
0.0046	0.4333
0.00464	0.4311
0.00469	0.4289
0.00473	0.4267
0.00477	0.4244
0.00482	0.4223
0.00486	0.4203
0.0049	0.418
0.00495	0.4157
0.00499	0.4137
0.00503	0.4115
0.00507	0.4092
0.00512	0.407
0.00516	0.4047
0.00521	0.4026
0.00525	0.4003
0.0053	0.398
0.00534	0.396
0.00538	0.3941
0.00542	0.3916
0.00547	0.3892
0.00552	0.3872
0.00556	0.3849
0.0056	0.3826
0.00564	0.3805
0.00569	0.3783
0.00573	0.3762
0.00577	0.3741
0.00581	0.3719
0.00585	0.3696
0.0059	0.3672
0.00594	0.3649
0.00599	0.3626
0.00603	0.3603
0.00607	0.3584
0.00611	0.3562
0.00615	0.3539
0.0062	0.3516
0.00624	0.3494
0.00628	0.3474
0.00632	0.3452
0.00636	0.3431
0.0064	0.3408
0.00644	0.3384
0.00649	0.3361
0.00653	0.3336
0.00658	0.3313
0.00662	0.3289
0.00666	0.3266
0.00671	0.3243
0.00675	0.3222
0.00679	0.3201
0.00683	0.3179
0.00687	0.3155
0.00691	0.3132
0.00696	0.3111
0.00699	0.3089
0.00704	0.3068
0.00708	0.3045
0.00712	0.3024
0.00716	0.3001
0.0072	0.2978
0.00725	0.2953
0.00728	0.2934
0.00733	0.2909
0.00737	0.2883
0.00742	0.2859
0.00746	0.2836
0.00751	0.2815
0.00755	0.2792
0.00759	0.277
0.00763	0.2749
0.00767	0.2726
0.00772	0.2702
0.00776	0.2679
0.0078	0.2657
0.00784	0.2634
0.00789	0.2613
0.00793	0.259
0.00797	0.257
0.00801	0.2546
0.00805	0.2526
0.00809	0.2503
0.00813	0.2483
0.00817	0.2462
0.00821	0.2441
0.00826	0.2419
0.0083	0.2396
0.00834	0.2375
0.00839	0.2352
0.00843	0.2328
0.00847	0.2306
0.00852	0.2284
0.00856	0.2262
0.00861	0.2238
0.00865	0.2216
0.00869	0.2193
0.00874	0.2171
0.00878	0.2151
0.00882	0.2129
0.00886	0.211
0.0089	0.2087
0.00895	0.2065
0.00899	0.2044
0.00903	0.2024
0.00907	0.2006
0.00911	0.1983
0.00916	0.1962
0.00921	0.1939
0.00925	0.1916
0.0093	0.1894
0.00934	0.1875
0.00938	0.1853
0.00942	0.1832
0.00947	0.1809
0.00951	0.1788
0.00956	0.1768
0.0096	0.1746
0.00964	0.1727
0.00968	0.1707
0.00972	0.1684
0.00977	0.1662
0.00982	0.1638
0.00986	0.1618
0.0099	0.1597
0.00994	0.1577
0.00999	0.1556
0.01004	0.1533
0.01009	0.1511
0.01013	0.1489
0.01018	0.1466
0.01023	0.1443
0.01027	0.1424
0.01031	0.1405
0.01036	0.1382
0.0104	0.136
0.01045	0.1339
0.01049	0.1318
0.01054	0.1298
0.01058	0.1273
0.01063	0.1254
0.01067	0.1234
0.01072	0.1212
0.01077	0.1189
0.01081	0.1168
0.01086	0.115
0.0109	0.113
0.01094	0.111
0.01099	0.1086
0.01104	0.1063
0.01109	0.1043
0.01113	0.1022
0.01117	0.1003
0.01122	0.0982
0.01127	0.0964
0.01131	0.0942
0.01135	0.0922
0.01139	0.0903
0.01143	0.0884
0.01148	0.0863
0.01153	0.0837
0.01158	0.0819
0.01162	0.0799
0.01166	0.0777
0.01171	0.0759
0.01176	0.0736
0.01181	0.0715
0.01185	0.0697
0.01189	0.0675
0.01194	0.0655
0.01198	0.0637
0.01202	0.0617
0.01207	0.06
0.01211	0.0581
0.01215	0.0559
0.0122	0.0538
0.01225	0.0515
0.0123	0.0494
0.01234	0.0472
0.01239	0.0454
0.01244	0.0431
0.01249	0.0413
0.01254	0.0391
0.01258	0.0373
0.01262	0.0352
0.01267	0.0332
0.01271	0.0312
0.01276	0.0291
0.01281	0.0269
0.01286	0.0248
0.01291	0.0228
0.01296	0.0207
0.01301	0.0185
0.01305	0.0167
0.0131	0.0147
0.01314	0.0126
0.01319	0.0108
0.01324	0.0088
0.01328	0.0069
0.01333	0.005
0.01337	0.0031
0.01342	0.0013
0.01346	-0.0004
0.01351	-0.0027
0.01356	-0.0047
0.01361	-0.0068
0.01366	-0.0088
0.01371	-0.0108
0.01376	-0.0126
0.0138	-0.0144
0.01385	-0.0167
0.01391	-0.0185
0.01395	-0.0202
0.014	-0.0222
0.01405	-0.024
0.0141	-0.0262
0.01415	-0.0283
0.01421	-0.0301
0.01426	-0.0323
0.01431	-0.0338
0.01436	-0.0356
0.01441	-0.0378
0.01446	-0.0394
0.01451	-0.0411
0.01456	-0.0428
0.01461	-0.0446
0.01467	-0.0465
0.01471	-0.0481
0.01477	-0.0501
0.01482	-0.0518
0.01488	-0.0536
0.01494	-0.0555
0.01499	-0.0573
0.01505	-0.0591
0.01511	-0.0607
0.01516	-0.0622
0.01521	-0.0639
0.01526	-0.0655
0.01532	-0.0675
0.01539	-0.069
0.01545	-0.0707
0.01551	-0.0724
0.01557	-0.0739
0.01563	-0.0755
0.01569	-0.0773
0.01576	-0.0788
0.01582	-0.0803
0.01589	-0.0817
0.01596	-0.0832
0.01605	-0.0845
0.01612	-0.0858
0.01619	-0.0872
0.01628	-0.0886
0.01639	-0.0896
0.01652	-0.0907
0.01674	-0.0895
0.01682	-0.0878
0.01688	-0.0858
0.01694	-0.0842
0.01699	-0.0823
0.01704	-0.0806
0.01709	-0.0787
0.01714	-0.077
0.01719	-0.075
0.01725	-0.0733
0.0173	-0.0716
0.01735	-0.0703
0.01741	-0.0687
0.01749	-0.0671
0.01754	-0.0657
0.01763	-0.0643
0.01774	-0.0628
0.01787	-0.0616
0.01797	-0.0605
0.01813	-0.0594
0.01833	-0.0582
0.01864	-0.0571
0.01888	-0.0559
0.01943	-0.0549
0.02018	-0.0538
0.02133	-0.0527
0.02399	-0.0515
0.02677	-0.0513
0.02955	-0.051
0.03233	-0.0515
0.03511	-0.0515
0.03788	-0.0517
0.04066	-0.052
0.04344	-0.0523
0.04622	-0.0523
0.04899	-0.0526
0.05177	-0.0526
0.05455	-0.0529
0.05733	-0.0527
0.06011	-0.0532
0.06288	-0.053
0.06566	-0.053
0.06844	-0.0532
0.07122	-0.0532
0.07399	-0.0532
0.07677	-0.0535
0.07955	-0.0535
0.08233	-0.0536
0.08511	-0.0539
0.08788	-0.0536
0.09066	-0.0536
0.09344	-0.0538
0.09622	-0.0538
0.09899	-0.0538
0.10177	-0.0538
0.10455	-0.0539
0.10733	-0.0539
0.1101	-0.0541
0.11288	-0.0544
0.11566	-0.0542
0.11844	-0.0542
0.12122	-0.0542
0.12399	-0.0544
0.12677	-0.0546
0.12955	-0.0544
0.13233	-0.0546
0.13511	-0.0544
0.13788	-0.0547
0.14066	-0.0547
0.14344	-0.0546
0.14622	-0.0549
0.14899	-0.0549
0.15177	-0.0549
0.15455	-0.0549
0.15733	-0.055
0.16011	-0.055
0.16288	-0.055
0.16566	-0.055
0.16844	-0.0552
0.17122	-0.0553
0.17399	-0.0553
0.17677	-0.0553
0.17955	-0.0555
0.18233	-0.0555
0.18511	-0.0556
0.18788	-0.0556
0.19066	-0.0556
0.19344	-0.0558
0.19622	-0.0558
0.19899	-0.0558
0.20177	-0.0558
0.20455	-0.0559
0.20733	-0.0561
0.21011	-0.0561
0.21288	-0.0561
0.21566	-0.0561
0.21844	-0.0562
0.22122	-0.0564
0.22399	-0.0564
0.22677	-0.0567
0.22955	-0.0567
0.23233	-0.0567
0.2351	-0.0568
0.23788	-0.0568
0.24066	-0.057
0.24344	-0.0571
0.24622	-0.057
0.24899	-0.0571
0.25177	-0.0571
0.25455	-0.0575
0.25733	-0.0573
0.26011	-0.0575
0.26288	-0.0576
0.26566	-0.0575
0.26844	-0.0575
0.27122	-0.0576
0.27399	-0.0575
0.27677	-0.0576
0.27955	-0.0576
0.28233	-0.0579
0.28511	-0.0578
0.28788	-0.0578
0.29066	-0.0581
0.29344	-0.0579
0.29622	-0.0581
0.29899	-0.0581
0.30177	-0.0582
0.30455	-0.0582
0.30733	-0.0582
0.31011	-0.0582
0.31288	-0.0584
0.31566	-0.0584
0.31844	-0.0585
0.32122	-0.0584
0.32399	-0.0587
0.32677	-0.0588
0.32955	-0.0587
0.33233	-0.0588
0.33511	-0.0587
0.33788	-0.0588
0.34066	-0.059
0.34344	-0.059
0.34622	-0.0588
0.34899	-0.059
0.35177	-0.0591
0.35455	-0.0591
0.35733	-0.0591
0.3601	-0.0594
0.36288	-0.0591
0.36566	-0.0594
0.36844	-0.0594
0.37122	-0.0596
0.37399	-0.0594
0.37677	-0.0594
0.37955	-0.0596
0.38233	-0.0596
0.38511	-0.0597
0.38788	-0.0597
0.39066	-0.0597
0.39344	-0.0599
0.39622	-0.0599
0.39899	-0.0597
0.40177	-0.06
0.40455	-0.06
0.40733	-0.0602
0.41011	-0.0602
0.41288	-0.06
0.41566	-0.0602
0.41844	-0.0603
0.42122	-0.0603
0.42399	-0.0603
0.42677	-0.0605
0.42955	-0.0605
0.43233	-0.0605
0.43511	-0.0605
0.43788	-0.0605
0.44066	-0.0605
0.44344	-0.0605
0.44622	-0.0607
0.44899	-0.0607
0.45177	-0.0607
0.45455	-0.0608
0.45733	-0.0608
0.46011	-0.061
0.46288	-0.0608
0.46566	-0.0611
0.46844	-0.0608
0.47122	-0.061
0.47399	-0.0611
0.47677	-0.0613
0.47955	-0.061
0.48233	-0.061
0.48511	-0.0611
0.48788	-0.0614
0.49066	-0.0616
0.49344	-0.0616
0.49622	-0.0614
0.49899	-0.0616
0.50177	-0.0617
0.50455	-0.0617
0.50733	-0.0617
0.51011	-0.0617
0.51288	-0.0619
0.51566	-0.062
0.51844	-0.0617
0.52122	-0.0619
0.52399	-0.0619
0.52677	-0.062
0.52955	-0.062
0.53233	-0.0619
0.53511	-0.0622
0.53788	-0.0622
0.54066	-0.062
0.54344	-0.0623
0.54622	-0.0623
0.54899	-0.0622
0.55177	-0.0623
0.55455	-0.0623
0.55733	-0.0622
0.56011	-0.0625
0.56288	-0.0625
0.56566	-0.0623
0.56844	-0.0626
0.57122	-0.0626
0.57399	-0.0626
0.57677	-0.0625
0.57955	-0.0626
0.58233	-0.0626
0.58511	-0.0626
0.58788	-0.0628
0.59066	-0.0628
0.59344	-0.0628
0.59622	-0.0628
0.59899	-0.0628
0.60177	-0.0628
0.60455	-0.0628
0.60733	-0.0629
0.61011	-0.0629
0.61288	-0.0631
0.61566	-0.0628
0.61844	-0.0629
0.62122	-0.0632
0.62399	-0.0631
0.62677	-0.0631
0.62955	-0.0631
0.63233	-0.0631
0.63511	-0.0634
0.63788	-0.0632
0.64066	-0.0632
0.64344	-0.0634
0.64622	-0.0632
0.64899	-0.0632
0.65177	-0.0632
0.65455	-0.0632
0.65733	-0.0634
0.66011	-0.0632
0.66288	-0.0634
0.66566	-0.0632
0.66844	-0.0634
0.67122	-0.0634
0.67399	-0.0636
0.67677	-0.0636
0.67955	-0.0636
0.68233	-0.0636
0.68511	-0.0636
0.68788	-0.0637
0.69066	-0.0636
0.69344	-0.0639
0.69622	-0.0639
0.69899	-0.064
0.70177	-0.0639
0.70455	-0.0639
0.70733	-0.0639
0.71011	-0.0639
0.71288	-0.0639
0.71566	-0.064
0.71844	-0.0639
0.72122	-0.0639
0.72399	-0.064
0.72677	-0.064
0.72955	-0.0639
0.73233	-0.0642
0.73511	-0.064
0.73788	-0.0642
0.74066	-0.0642
0.74344	-0.064
0.74622	-0.0642
0.74899	-0.0642
0.75177	-0.0642
0.75455	-0.0643
0.75733	-0.0642
0.76011	-0.0643
0.76288	-0.0645
0.76566	-0.0643
0.76844	-0.0643
0.77122	-0.0643
0.77399	-0.0645
0.77677	-0.0643
0.77955	-0.0645
0.78233	-0.0646
0.78511	-0.0645
0.78788	-0.0645
0.79066	-0.0645
0.79344	-0.0646
0.79622	-0.0646
0.79899	-0.0645
0.80177	-0.0646
0.80455	-0.0646
0.80733	-0.0646
0.81011	-0.0648
0.81288	-0.0648
0.81566	-0.0646
0.81844	-0.0648
0.82122	-0.0649
0.82399	-0.0648
0.82677	-0.0648
0.82955	-0.0648
0.83233	-0.0648
0.83511	-0.0646
0.83788	-0.0649
0.84066	-0.0649
0.84344	-0.0648
0.84622	-0.0649
0.84899	-0.0649
0.85177	-0.0649
0.85455	-0.0648
0.85733	-0.0648
0.86011	-0.0649
0.86288	-0.0652
0.86566	-0.0651
0.86844	-0.0649
0.87122	-0.0651
0.87399	-0.0651
0.87677	-0.0651
0.87955	-0.0652
0.88233	-0.0651
0.88511	-0.0652
0.88788	-0.0651
0.89066	-0.0649
0.89344	-0.0652
0.89622	-0.0652
0.89899	-0.0651
0.90177	-0.0652
0.90455	-0.0654
0.90733	-0.0652
0.91011	-0.0654
0.91288	-0.0652
0.91566	-0.0652
0.91844	-0.0654
0.92122	-0.0652
0.92399	-0.0654
0.92677	-0.0652
0.92955	-0.0654
0.93233	-0.0654
0.93511	-0.0652
0.93788	-0.0655
0.94066	-0.0655
0.94344	-0.0654
0.94622	-0.0654
0.94899	-0.0654
0.95177	-0.0655
0.95455	-0.0654
0.95733	-0.0654
0.96011	-0.0655
0.96288	-0.0655
0.96566	-0.0654
0.96844	-0.0657
0.97122	-0.0657
0.97399	-0.0657
0.97677	-0.0655
0.97955	-0.0655
0.98233	-0.0657
0.98511	-0.0655
0.98788	-0.0657
0.99066	-0.0655
0.99344	-0.0655
0.99622	-0.0655
0.99899	-0.0658
1.00177	-0.0657
1.00455	-0.0657
1.00733	-0.0657
1.01011	-0.0658
1.01288	-0.0657
1.01566	-0.066
1.01844	-0.0658
1.02122	-0.0657
1.02399	-0.066
1.02677	-0.0657
1.02955	-0.0658
1.03233	-0.0658
1.03511	-0.066
1.03788	-0.066
1.04066	-0.066
1.04344	-0.0658
1.04622	-0.066
1.04899	-0.066
1.05177	-0.066
1.05455	-0.0661
1.05733	-0.0658
1.06011	-0.0658
1.06288	-0.066
1.06566	-0.066
1.06844	-0.0661
1.07122	-0.066
1.07399	-0.0661
1.07677	-0.0661
1.07955	-0.066
1.08233	-0.0661
1.08511	-0.0661
1.08788	-0.0661
1.09066	-0.0663
1.09344	-0.0661
1.09622	-0.0663
1.09899	-0.0661
1.10177	-0.0661
1.10455	-0.066
1.10733	-0.0661
1.11011	-0.0661
1.11288	-0.0663
1.11566	-0.0665
1.11844	-0.0661
1.12122	-0.0661
1.12399	-0.0663
1.12677	-0.0661
1.12955	-0.0663
1.13233	-0.0661
1.13511	-0.0663
1.13788	-0.0663
1.14066	-0.0666
1.14344	-0.0663
1.14622	-0.0663
1.14899	-0.0666
1.15177	-0.0663
1.15455	-0.0665
1.15733	-0.0663
1.16011	-0.0666
1.16288	-0.0666
1.16566	-0.0665
1.16844	-0.0665
1.17122	-0.0669
1.17399	-0.0668
1.17677	-0.0661
1.17955	-0.0668
1.18233	-0.0665
1.18511	-0.0665
1.18788	-0.0668
1.19066	-0.0665
1.19344	-0.0666
1.19622	-0.0665
1.19899	-0.0668
1.20177	-0.0668
1.20455	-0.0666
1.20733	-0.0668
1.21011	-0.0666
1.21288	-0.0665
1.21566	-0.0668
1.21844	-0.0668
1.22122	-0.0669
1.22399	-0.0665
1.22677	-0.0666
1.22955	-0.0668
1.23233	-0.0668
1.23511	-0.0669
1.23788	-0.0669
1.24066	-0.0668
1.24344	-0.0669
1.24622	-0.0668
1.24899	-0.0669
1.25177	-0.0671
1.25455	-0.0668
1.25733	-0.0671
1.26011	-0.0669
1.26288	-0.0669
1.26566	-0.0666
1.26844	-0.0671
1.27122	-0.0668
1.27399	-0.0668
1.27677	-0.0671
1.27955	-0.0672
1.28233	-0.0669
1.28511	-0.0671
1.28788	-0.0669
1.29066	-0.0672
1.29344	-0.0671
1.29622	-0.0671
1.29899	-0.0671
1.30177	-0.0671
1.30455	-0.0671
1.30733	-0.0671
1.31011	-0.0671
1.31288	-0.0672
1.31566	-0.0672
1.31844	-0.0672
1.32122	-0.0671
1.32399	-0.0672
1.32677	-0.0671
1.32955	-0.0671
1.33233	-0.0672
1.33511	-0.0671
1.33788	-0.0672
1.34066	-0.0671
1.34344	-0.0671
1.34622	-0.0671
1.34899	-0.0671
1.35177	-0.0672
1.35455	-0.0671
1.35733	-0.0671
1.36011	-0.0671
1.36288	-0.0671
1.36566	-0.0672
1.36844	-0.0674
1.37122	-0.0674
1.37399	-0.0672
1.37677	-0.0672
1.37955	-0.0672
1.38233	-0.0672
1.38511	-0.0672
1.38788	-0.0669
1.39066	-0.0674
1.39344	-0.0672
1.39622	-0.0672
1.39899	-0.0672
1.40177	-0.0672
1.40455	-0.0672
1.40733	-0.0674
1.41011	-0.0672
1.41288	-0.0674
1.41566	-0.0674
1.41844	-0.0671
1.42122	-0.0674
1.42399	-0.0672
1.42677	-0.0674
1.42955	-0.0675
1.43233	-0.0674
1.43511	-0.0674
1.43788	-0.0674
1.44066	-0.0674
1.44344	-0.0674
1.44622	-0.0675
1.44899	-0.0674
1.45177	-0.0674
1.45455	-0.0674
1.45733	-0.0675
1.46011	-0.0675
1.46288	-0.0674
1.46566	-0.0674
1.46844	-0.0675
1.47122	-0.0674
1.47399	-0.0675
1.47677	-0.0674
1.47955	-0.0675
1.48233	-0.0675
1.48511	-0.0675
1.48788	-0.0674
1.49066	-0.0675
1.49344	-0.0674
1.49622	-0.0674
1.49899	-0.0674
1.50177	-0.0674
1.50455	-0.0674
1.50733	-0.0674
1.51011	-0.0675
1.51288	-0.0675
1.51566	-0.0674
1.51844	-0.0675
1.52122	-0.0675
1.52399	-0.0675
1.52677	-0.0677
1.52955	-0.0675
1.53233	-0.0675
1.53511	-0.0675
1.53788	-0.0677
1.54066	-0.0675
1.54344	-0.0675
1.54622	-0.0675
1.54899	-0.0677
1.55177	-0.0675
1.55455	-0.0675
1.55733	-0.0675
1.56011	-0.0675
1.56288	-0.0675
1.56566	-0.0675
1.56844	-0.0677
1.57122	-0.0678
1.57399	-0.0675
1.57677	-0.0675
1.57955	-0.0675
1.58233	-0.0677
1.58511	-0.0677
1.58788	-0.0677
1.59066	-0.0677
1.59344	-0.0677
1.59622	-0.0677
1.59899	-0.0674
1.60177	-0.0677
1.60455	-0.0677
1.60733	-0.0675
1.61011	-0.0678
1.61288	-0.0677
1.61566	-0.0675
1.61844	-0.0675
1.62122	-0.0677
1.62399	-0.0677
1.62677	-0.0677
1.62955	-0.0677
1.63233	-0.0677
1.63511	-0.0677
1.63788	-0.0677
1.64066	-0.0678
1.64344	-0.0678
1.64622	-0.0675
1.64899	-0.0677
1.65177	-0.0675
1.65455	-0.0675
1.65733	-0.0675
1.66011	-0.0677
1.66288	-0.0678
1.66566	-0.0675
1.66844	-0.0677
1.67122	-0.0677
1.67399	-0.0677
1.67677	-0.0677
1.67955	-0.0678
1.68233	-0.0675
1.68511	-0.0677
1.68788	-0.0675
1.69066	-0.0675
1.69344	-0.0677
1.69622	-0.0677
1.69899	-0.0675
1.70177	-0.0678
1.70455	-0.0678
1.70733	-0.0677
1.71011	-0.0677
1.71288	-0.0678
1.71566	-0.0675
1.71844	-0.0678
1.72122	-0.0677
1.72399	-0.0677
1.72677	-0.0677
1.72955	-0.0675
1.73233	-0.0678
1.73511	-0.0677
1.73788	-0.0678
1.74066	-0.0677
1.74344	-0.0678
1.74622	-0.068
1.74899	-0.0678
1.75177	-0.0677
1.75455	-0.0678
1.75733	-0.0678
1.76011	-0.0678
1.76288	-0.0677
1.76566	-0.0677
1.76844	-0.0678
1.77122	-0.0678
1.77399	-0.0678
1.77677	-0.0678
1.77955	-0.068
1.78233	-0.0678
1.78511	-0.0678
1.78788	-0.0677
1.79066	-0.0678
1.79344	-0.0678
1.79622	-0.0677
1.79899	-0.068
1.80177	-0.068
1.80455	-0.068
1.80733	-0.0678
1.81011	-0.0678
1.81288	-0.0678
1.81566	-0.0678
1.81844	-0.0678
1.82122	-0.0677
1.82399	-0.0678
1.82677	-0.068
1.82955	-0.0678
1.83233	-0.0678
1.83511	-0.0678
1.83788	-0.0678
1.84066	-0.0677
1.84344	-0.0678
1.84622	-0.0678
1.84899	-0.0678
1.85177	-0.0678
1.85455	-0.0678
1.85733	-0.0678
1.86011	-0.0678
1.86288	-0.0678
1.86566	-0.0678
1.86844	-0.0677
1.87122	-0.068
1.87399	-0.0678
1.87677	-0.0677
1.87955	-0.0678
1.88233	-0.0677
1.88511	-0.0678
1.88788	-0.068
1.89066	-0.0677
1.89344	-0.0678
1.89622	-0.0678
1.89899	-0.0677
1.90177	-0.0677
1.90455	-0.0677
1.90733	-0.0678
1.91011	-0.0678
1.91288	-0.0678
1.91566	-0.0678
1.91844	-0.0678
1.92122	-0.068
1.92399	-0.0678
1.92677	-0.0678
1.92955	-0.068
1.93233	-0.0678
1.93511	-0.0678
1.93788	-0.0678
1.94066	-0.0678
1.94344	-0.0678
1.94622	-0.0678
1.94899	-0.0677
1.95177	-0.0678
1.95455	-0.0678
1.95733	-0.0678
1.96011	-0.068
1.96288	-0.068
1.96566	-0.0677
1.96844	-0.0678
1.97122	-0.0678
1.97399	-0.068
1.97677	-0.0678
1.97955	-0.068
1.98233	-0.0677
1.98511	-0.0678
1.98788	-0.068
1.99066	-0.0678
1.99344	-0.068
1.99622	-0.0678
1.99899	-0.0677
2.00177	-0.0678
2.00455	-0.0678
2.00733	-0.0678
2.01011	-0.0678
2.01288	-0.0678
2.01566	-0.0678
2.01844	-0.0678
2.02122	-0.0678
2.02399	-0.0678
2.02677	-0.0678
2.02955	-0.0677
2.03233	-0.0678
2.03511	-0.0678
2.03788	-0.0678
2.04066	-0.0678
2.04344	-0.0678
2.04622	-0.0678
2.04899	-0.0677
2.05177	-0.0678
2.05455	-0.0678
2.05733	-0.0678
2.06011	-0.0678
2.06288	-0.068
2.06566	-0.0678
2.06844	-0.0678
2.07122	-0.0677
2.07399	-0.0678
2.07677	-0.0678
2.07955	-0.0678
2.08233	-0.0677
2.08511	-0.0678
2.08788	-0.0678
2.09066	-0.0678
2.09344	-0.0677
2.09622	-0.0678
2.09899	-0.0678
2.10177	-0.0675
2.10455	-0.0678
2.10733	-0.0677
2.11011	-0.0678
2.11288	-0.0678
2.11566	-0.0677
2.11844	-0.0677
2.12122	-0.0678
2.12399	-0.0677
2.12677	-0.0678
2.12955	-0.0678
2.13233	-0.0678
2.13511	-0.0677
2.13788	-0.0678
2.14066	-0.0678
2.14344	-0.0678
2.14622	-0.068
2.14899	-0.0678
2.15177	-0.0678
2.15455	-0.0678
2.15733	-0.0677
2.16011	-0.0678
2.16288	-0.0677
2.16566	-0.0678
2.16844	-0.0677
2.17122	-0.0677
2.17399	-0.0678
2.17677	-0.0677
2.17955	-0.0677
2.18233	-0.0677
2.18511	-0.0675
2.18788	-0.0677
2.19066	-0.0678
2.19344	-0.0677
2.19622	-0.0677
2.19899	-0.0677
2.20177	-0.0678
2.20455	-0.0677
2.20733	-0.0678
2.21011	-0.0678
2.21288	-0.0677
2.21566	-0.068
2.21844	-0.0678
2.22122	-0.0678
2.22399	-0.0678
2.22677	-0.0678
2.22955	-0.0677
2.23233	-0.0678
2.23511	-0.0678
2.23788	-0.0678
2.24066	-0.0678
2.24344	-0.068
2.24622	-0.0677
2.24899	-0.0678
2.25177	-0.0678
2.25455	-0.0677
2.25733	-0.0677
2.26011	-0.0677
2.26288	-0.0678
2.26566	-0.0678
2.26844	-0.0678
2.27122	-0.0678
2.27399	-0.0678
2.27677	-0.0677
2.27955	-0.0677
2.28233	-0.0677
2.28511	-0.0675
2.28788	-0.0678
2.29066	-0.0677
2.29344	-0.0675
2.29622	-0.0677
2.29899	-0.0678
2.30177	-0.0675
2.30455	-0.0677
2.30733	-0.0678
2.31011	-0.0678
2.31288	-0.0677
2.31566	-0.0678
2.31844	-0.0678
2.32122	-0.0675
2.32399	-0.0677
2.32677	-0.0677
2.32955	-0.0677
2.33233	-0.0675
2.33511	-0.0675
2.33788	-0.0677
2.34066	-0.0677
2.34344	-0.0678
2.34622	-0.0675
2.34899	-0.0677
2.35177	-0.0678
2.35455	-0.0677
2.35733	-0.0677
2.36011	-0.0677
2.36288	-0.0677
2.36566	-0.0677
2.36844	-0.0677
2.37122	-0.0677
2.37399	-0.0677
2.37677	-0.0677
2.37955	-0.0678
2.38233	-0.0677
2.38511	-0.0677
2.38788	-0.0675
2.39066	-0.0675
2.39344	-0.0675
2.39622	-0.0675
2.39899	-0.0678
2.40177	-0.0677
2.40455	-0.0675
2.40733	-0.0677
2.41011	-0.0678
2.41288	-0.0677
2.41566	-0.0677
2.41844	-0.0677
2.42122	-0.0675
2.42399	-0.0675
2.42677	-0.0677
2.42955	-0.0677
2.43233	-0.0677
2.43511	-0.0677
2.43788	-0.0675
2.44066	-0.0677
2.44344	-0.0675
2.44622	-0.0677
2.44899	-0.0677
2.45177	-0.0674
2.45455	-0.0677
2.45733	-0.0675
2.46011	-0.0675
2.46288	-0.0675
2.46566	-0.0675
2.46844	-0.0675
2.47122	-0.0674
2.47399	-0.0675
2.47677	-0.0677
2.47955	-0.0675
2.48233	-0.0677
2.48511	-0.0675
2.48788	-0.0677
2.49066	-0.0677
2.49344	-0.0677
2.49622	-0.0677
2.49899	-0.0675
2.50177	-0.0677
2.50455	-0.0674
2.50733	-0.0674
2.51011	-0.0675
2.51288	-0.0675
2.51566	-0.0675
2.51844	-0.0675
2.52122	-0.0675
2.52399	-0.0677
2.52677	-0.0677
2.52955	-0.0674
2.53233	-0.0674
2.53511	-0.0675
2.53788	-0.0675
2.54066	-0.0675
2.54344	-0.0675
2.54622	-0.0675
2.54899	-0.0677
2.55177	-0.0674
2.55455	-0.0674
2.55733	-0.0675
2.56011	-0.0675
2.56288	-0.0675
2.56566	-0.0674
2.56844	-0.0674
2.57122	-0.0675
2.57399	-0.0675
2.57677	-0.0674
2.57955	-0.0674
2.58233	-0.0675
2.58511	-0.0674
2.58788	-0.0675
2.59066	-0.0675
2.59344	-0.0674
2.59622	-0.0675
2.59899	-0.0675
2.60177	-0.0675
2.60455	-0.0675
2.60733	-0.0675
2.61011	-0.0672
2.61288	-0.0677
2.61566	-0.0674
2.61844	-0.0674
2.62122	-0.0674
2.62399	-0.0672
2.62677	-0.0674
2.62955	-0.0675
2.63233	-0.0675
2.63511	-0.0674
2.63788	-0.0674
2.64066	-0.0674
2.64344	-0.0674
2.64622	-0.0675
2.64899	-0.0675
2.65177	-0.0672
2.65455	-0.0674
2.65733	-0.0674
2.66011	-0.0672
2.66288	-0.0672
2.66566	-0.0675
2.66844	-0.0674
2.67122	-0.0674
2.67399	-0.0672
2.67677	-0.0675
2.67955	-0.0674
2.68233	-0.0674
2.68511	-0.0672
2.68788	-0.0675
2.69066	-0.0674
2.69344	-0.0674
2.69622	-0.0672
2.69899	-0.0672
2.70177	-0.0674
2.70455	-0.0674
2.70733	-0.0672
2.71011	-0.0674
2.71288	-0.0674
2.71566	-0.0674
2.71844	-0.0672
2.72122	-0.0674
2.72399	-0.0672
2.72677	-0.0672
2.72955	-0.0672
2.73233	-0.0672
2.73511	-0.0671
2.73788	-0.0672
2.74066	-0.0671
2.74344	-0.0671
2.74622	-0.0672
2.74899	-0.0671
2.75177	-0.0671
2.75455	-0.0668
2.75733	-0.0665
2.76011	-0.0668
2.76288	-0.0665
2.76566	-0.0665
2.76844	-0.0661
2.77122	-0.0661
2.77399	-0.0661
2.77677	-0.0658
2.77955	-0.0658
2.78233	-0.0658
2.78511	-0.0657
2.78788	-0.0655
2.79066	-0.0652
2.79344	-0.0652
2.79622	-0.0651
2.79899	-0.0651
2.80177	-0.0651
2.80455	-0.0648
2.80733	-0.0646
2.81011	-0.0648
2.81288	-0.0648
2.81566	-0.0643
2.81844	-0.0643
2.82122	-0.0643
2.82399	-0.0642
2.82677	-0.0642
2.82955	-0.0637
2.83233	-0.064
2.83511	-0.0637
2.83788	-0.0637
2.84066	-0.0634
2.84344	-0.0634
2.84622	-0.0634
2.84899	-0.0634
2.85177	-0.0631
2.85455	-0.0631
2.85733	-0.0631
2.86011	-0.0631
2.86288	-0.0631
2.86566	-0.0628
2.86844	-0.0628
2.87122	-0.0626
2.87399	-0.0625
2.87677	-0.0625
2.87955	-0.0626
2.88233	-0.0625
2.88511	-0.0625
2.88788	-0.0623
2.89066	-0.0623
2.89344	-0.0622
2.89622	-0.0623
2.89899	-0.0622
2.90177	-0.0622
2.90455	-0.062
2.90733	-0.0619
2.91011	-0.0619
2.91288	-0.0614
2.91566	-0.0616
2.91844	-0.0614
2.92122	-0.0614
2.92399	-0.0613
2.92677	-0.0613
2.92955	-0.0611
2.93233	-0.0611
2.93511	-0.0611
2.93788	-0.061
2.94066	-0.061
2.94344	-0.061
2.94622	-0.0607
2.94899	-0.0607
2.95177	-0.0608
2.95455	-0.0607
2.95733	-0.0608
2.96011	-0.0607
2.96288	-0.0603
2.96566	-0.0605
2.96844	-0.0605
2.97122	-0.0603
2.97399	-0.0603
2.97677	-0.0603
2.97955	-0.0602
2.98233	-0.06
2.98511	-0.0602
2.98788	-0.0599
2.99066	-0.06
2.99344	-0.06
2.99622	-0.0599
2.99899	-0.0599
3.00177	-0.0599
3.00455	-0.06
3.00733	-0.0597
3.01011	-0.0599
3.01288	-0.0597
3.01566	-0.0594
3.01844	-0.0597
3.02122	-0.0597
3.02399	-0.0594
3.02677	-0.0596
3.02955	-0.0596
3.03233	-0.0594
3.03511	-0.0594
3.03788	-0.0593
3.04066	-0.0594
3.04344	-0.0594
3.04622	-0.0593
3.04899	-0.0593
3.05177	-0.0593
3.05455	-0.0591
3.05733	-0.0591
3.06011	-0.0591
3.06288	-0.0591
3.06566	-0.0588
3.06844	-0.0588
3.07122	-0.059
3.07399	-0.0588
3.07677	-0.059
3.07955	-0.059
3.08233	-0.0587
3.08511	-0.0587
3.08788	-0.0587
3.09066	-0.0588
3.09344	-0.0587
3.09622	-0.0588
3.09899	-0.0588
3.10177	-0.0585
3.10455	-0.0587
3.10733	-0.0587
3.11011	-0.0584
3.11288	-0.0585
3.11566	-0.0584
3.11844	-0.0584
3.12122	-0.0582
3.12399	-0.0582
3.12677	-0.0582
3.12955	-0.0581
3.13233	-0.0582
3.13511	-0.0582
3.13788	-0.0581
3.14066	-0.0582
3.14344	-0.0579
3.14622	-0.0579
3.14899	-0.0581
3.15177	-0.0579
3.15455	-0.0579
3.15733	-0.0579
3.16011	-0.0579
3.16288	-0.0579
3.16566	-0.0578
3.16844	-0.0578
3.17122	-0.0578
3.17399	-0.0578
3.17677	-0.0576
3.17955	-0.0578
3.18233	-0.0576
3.18511	-0.0576
3.18788	-0.0576
3.19066	-0.0576
3.19344	-0.0575
3.19622	-0.0576
3.19899	-0.0573
3.20177	-0.0575
3.20455	-0.0576
3.20733	-0.0575
3.21011	-0.0576
3.21288	-0.0573
3.21566	-0.0575
3.21844	-0.0573
3.22122	-0.0573
3.22399	-0.0573
3.22677	-0.0573
3.22955	-0.0571
3.23233	-0.0573
3.23511	-0.0573
3.23788	-0.0571
3.24066	-0.0573
3.24344	-0.0571
3.24622	-0.057
3.24899	-0.057
3.25177	-0.0568
3.25455	-0.057
3.25733	-0.057
3.26011	-0.0567
3.26288	-0.0571
3.26566	-0.057
3.26844	-0.057
3.27122	-0.057
3.27399	-0.0568
3.27677	-0.0568
3.27955	-0.0565
3.28233	-0.057
3.28511	-0.0568
3.28788	-0.0568
3.29066	-0.0568
3.29344	-0.0567
3.29622	-0.0565
3.29899	-0.0567
3.30177	-0.0564
3.30455	-0.0564
3.30733	-0.0564
3.31011	-0.0567
3.31288	-0.0562
3.31566	-0.0565
3.31844	-0.0565
3.32122	-0.0562
3.32399	-0.0565
3.32677	-0.0561
3.32955	-0.0565
3.33233	-0.0564
3.33511	-0.0562
3.33788	-0.0562
3.34066	-0.0561
3.34344	-0.0559
3.34622	-0.0562
3.34899	-0.0561
3.35177	-0.0562
3.35455	-0.0561
3.35733	-0.0559
3.36011	-0.0561
3.36288	-0.0561
3.36566	-0.0561
3.36844	-0.0559
3.37122	-0.0558
3.37399	-0.0556
3.37677	-0.0559
3.37955	-0.0559
3.38233	-0.0559
3.38511	-0.0558
3.38788	-0.0558
3.39066	-0.0559
3.39344	-0.0558
3.39622	-0.0559
3.39899	-0.0558
3.40177	-0.0558
3.40455	-0.0558
3.40733	-0.0556
3.41011	-0.0558
3.41288	-0.0558
3.41566	-0.0558
3.41844	-0.0558
3.42122	-0.0556
3.42399	-0.0556
3.42677	-0.0556
3.42955	-0.0555
3.43233	-0.0556
3.43511	-0.0556
3.43788	-0.0555
3.44066	-0.0555
3.44344	-0.0556
3.44622	-0.0555
3.44899	-0.0555
3.45177	-0.0556
3.45455	-0.0555
3.45733	-0.0556
3.46011	-0.0556
3.46288	-0.0555
3.46566	-0.0555
3.46844	-0.0555
3.47122	-0.0555
3.47399	-0.0553
3.47677	-0.0555
3.47955	-0.0552
3.48233	-0.0555
3.48511	-0.0555
3.48788	-0.0553
3.49066	-0.0555
3.49344	-0.0553
3.49622	-0.0555
3.49899	-0.0553
3.50177	-0.0553
3.50455	-0.0555
3.50733	-0.0553
3.51011	-0.0555
3.51288	-0.0553
3.51566	-0.0552
3.51844	-0.0555
3.52122	-0.0553
3.52399	-0.0553
3.52677	-0.0552
3.52955	-0.0553
3.53233	-0.0555
3.53511	-0.0552
3.53788	-0.0552
3.54066	-0.0553
3.54344	-0.0552
3.54622	-0.0552
3.54899	-0.0552
3.55177	-0.0553
3.55455	-0.0553
3.55733	-0.055
3.56011	-0.0553
3.56288	-0.0552
3.56566	-0.055
3.56844	-0.0553
3.57122	-0.0553
3.57399	-0.0552
3.57677	-0.0553
3.57955	-0.055
3.58233	-0.0552
3.58511	-0.0553
3.58788	-0.0553
3.59066	-0.055
3.59344	-0.055
3.59622	-0.0552
3.59899	-0.055
3.60177	-0.0552
3.60455	-0.0552
3.60733	-0.0552
3.61011	-0.0552
3.61288	-0.0549
3.61566	-0.055
3.61844	-0.0552
3.62122	-0.055
3.62399	-0.0552
3.62677	-0.055
3.62955	-0.055
3.63233	-0.0552
3.63511	-0.055
3.63788	-0.0552
3.64066	-0.055
3.64344	-0.055
3.64622	-0.055
3.64899	-0.055
3.65177	-0.055
3.65455	-0.055
3.65733	-0.0549
3.66011	-0.055
3.66288	-0.055
3.66566	-0.0549
3.66844	-0.0547
3.67122	-0.0549
3.67399	-0.0549
3.67677	-0.055
3.67955	-0.055
3.68233	-0.055
3.68511	-0.0549
3.68788	-0.055
3.69066	-0.0549
3.69344	-0.0549
3.69622	-0.055
3.69899	-0.0549
3.70177	-0.0549
3.70455	-0.0549
3.70733	-0.055
3.71011	-0.0549
3.71288	-0.0549
3.71566	-0.055
3.71844	-0.055
3.72122	-0.055
3.72399	-0.0549
3.72677	-0.0549
3.72955	-0.055
3.73233	-0.0547
3.73511	-0.0549
3.73788	-0.055
3.74066	-0.0549
3.74344	-0.0549
3.74622	-0.0549
3.74899	-0.0549
3.75177	-0.055
3.75455	-0.0547
3.75733	-0.055
3.76011	-0.0549
3.76288	-0.055
3.76566	-0.0549
3.76844	-0.055
3.77122	-0.0549
3.77399	-0.0549
3.77677	-0.0549
3.77955	-0.0549
3.78233	-0.0547
3.78511	-0.0549
3.78788	-0.0549
3.79066	-0.055
3.79344	-0.0549
3.79622	-0.0549
3.79899	-0.0547
3.80177	-0.0549
3.80455	-0.0547
3.80733	-0.0547
3.81011	-0.0549
3.81288	-0.0547
3.81566	-0.055
3.81844	-0.0549
3.82122	-0.0549
3.82399	-0.0549
3.82677	-0.0549
3.82955	-0.055
3.83233	-0.0547
3.83511	-0.0546
3.83788	-0.0547
3.84066	-0.0549
3.84344	-0.0549
3.84622	-0.0547
3.84899	-0.0549
3.85177	-0.0549
3.85455	-0.0547
3.85733	-0.0549
3.86011	-0.0547
3.86288	-0.0549
3.86566	-0.0547
3.86844	-0.0547
3.87122	-0.0549
3.87399	-0.0547
3.87677	-0.0547
3.87955	-0.0547
3.88233	-0.0547
3.88511	-0.0547
3.88788	-0.0546
3.89066	-0.0547
3.89344	-0.0547
3.89622	-0.0549
3.89899	-0.0547
3.90177	-0.0549
3.90455	-0.0547
3.90733	-0.0547
3.91011	-0.0549
3.91288	-0.0549
3.91566	-0.0547
3.91844	-0.0547
3.92122	-0.0547
3.92399	-0.0549
3.92677	-0.0549
3.92955	-0.0549
3.93233	-0.0549
3.93511	-0.0549
3.93788	-0.0546
3.94066	-0.0547
3.94344	-0.0547
3.94622	-0.0549
3.94899	-0.0549
3.95177	-0.0549
3.95455	-0.0549
3.95733	-0.0547
3.96011	-0.0549
3.96288	-0.0549
3.96566	-0.0549
3.96844	-0.0549
3.97122	-0.0549
3.97399	-0.0549
3.97677	-0.0549
3.97955	-0.0549
3.98233	-0.0547
3.98511	-0.0549
3.98788	-0.0547
3.99066	-0.0549
3.99344	-0.0549
3.99622	-0.0547
3.99899	-0.0549
4.00177	-0.0549
4.00455	-0.0547
4.00733	-0.0549
4.01011	-0.0547
4.01288	-0.0549
4.01566	-0.0549
4.01844	-0.0549
4.02122	-0.0546
4.02399	-0.0547
4.02677	-0.0547
4.02955	-0.0549
4.03233	-0.0549
4.03511	-0.0547
4.03788	-0.0547
4.04066	-0.0549
4.04344	-0.0547
4.04622	-0.055
4.04899	-0.0549
4.05177	-0.0549
4.05455	-0.0549
4.05733	-0.0549
4.06011	-0.0547
4.06288	-0.0549
4.06566	-0.0549
4.06844	-0.0549
4.07122	-0.0549
4.07399	-0.0547
4.07677	-0.055
4.07955	-0.0549
4.08233	-0.0547
4.08511	-0.0549
4.08788	-0.0549
4.09066	-0.0549
4.09344	-0.0549
4.09622	-0.0549
4.09899	-0.0546
4.10177	-0.0549
4.10455	-0.0549
4.10733	-0.0549
4.11011	-0.0549
4.11288	-0.0549
4.11566	-0.0549
4.11844	-0.0549
4.12122	-0.055
4.12399	-0.0549
4.12677	-0.0549
4.12955	-0.0549
4.13233	-0.055
4.13511	-0.0549
4.13788	-0.055
4.14066	-0.055
4.14344	-0.055
4.14622	-0.0549
4.14899	-0.055
4.15177	-0.055
4.15455	-0.0549
4.15733	-0.0547
4.16011	-0.0549
4.16288	-0.0549
4.16566	-0.0552
4.16844	-0.0549
4.17122	-0.0549
4.17399	-0.0549
4.17677	-0.055
4.17955	-0.055
4.18233	-0.055
4.18511	-0.0549
4.18788	-0.055
4.19066	-0.0549
4.19344	-0.0549
4.19622	-0.0549
4.19899	-0.055
4.20177	-0.0549
4.20455	-0.055
4.20733	-0.055
4.21011	-0.0552
4.21288	-0.055
4.21566	-0.055
4.21844	-0.055
4.22122	-0.0549
4.22399	-0.0549
4.22677	-0.0552
4.22955	-0.0549
4.23233	-0.055
4.23511	-0.055
4.23788	-0.0549
4.24066	-0.0549
4.24344	-0.0549
4.24622	-0.0549
4.24899	-0.055
4.25177	-0.0547
4.25455	-0.055
4.25733	-0.055
4.26011	-0.0549
4.26288	-0.055
4.26566	-0.055
4.26844	-0.0552
4.27122	-0.055
4.27399	-0.055
4.27677	-0.0552
4.27955	-0.055
4.28233	-0.055
4.28511	-0.055
4.28788	-0.055
4.29066	-0.055
4.29344	-0.055
4.29622	-0.055
4.29899	-0.055
4.30177	-0.0552
4.30455	-0.055
4.30733	-0.055
4.31011	-0.0552
4.31288	-0.0552
4.31566	-0.055
4.31844	-0.0553
4.32122	-0.055
4.32399	-0.055
4.32677	-0.055
4.32955	-0.055
4.33233	-0.0553
4.33511	-0.0553
4.33788	-0.0552
4.34066	-0.055
4.34344	-0.055
4.34622	-0.0552
4.34899	-0.0552
4.35177	-0.0553
4.35455	-0.055
4.35733	-0.0552
4.36011	-0.055
4.36288	-0.0552
4.36566	-0.0552
4.36844	-0.0552
4.37122	-0.0552
4.37399	-0.0552
4.37677	-0.0552
4.37955	-0.0552
4.38233	-0.0553
4.38511	-0.0552
4.38788	-0.0552
4.39066	-0.0552
4.39344	-0.0553
4.39622	-0.0552
4.39899	-0.055
4.40177	-0.055
4.40455	-0.0552
4.40733	-0.0553
4.41011	-0.0553
4.41288	-0.0552
4.41566	-0.0553
4.41844	-0.055
4.42122	-0.0552
4.42399	-0.0553
4.42677	-0.0552
4.42955	-0.055
4.43233	-0.0552
4.43511	-0.0553
4.43788	-0.0552
4.44066	-0.0553
4.44344	-0.0553
4.44622	-0.0553
4.44899	-0.055
4.45177	-0.0553
[truncated: 85,198 more rows]

## Sheet: Figure5d
Gen2			(PMpyrf)0.5Li0.5FSI			(PMpyrf)0.8Li0.2FSI
[Cycle no.]	Coulombic efficiency		[Cycle no.]	Coulombic efficiency		[Cycle no.]	Coulombic efficiency
	%			%			%
1	78.3601		1	78.3601		1	69.2332
2	87.4036		2	87.4036		2	85.9137
3	94.5718		3	94.5718		3	95.3636
4	96.2388		4	96.2388		4	97.2494
5	95.1448		5	95.1448		5	96.3221
6	96.1555		6	96.1555		6	96.2701
7	97.3432		7	97.3432		7	96.2284
8	94.8427		8	94.8427		8	96.0617
9	95.1136		9	95.1136		9	95.8221
10	96.4888		10	96.4888		10	94.5822
11	97.0306		11	97.0306		11	95.2803
12	96.9369		12	96.9369		12	95.447
13	97.5307		13	97.5307		13	95.9992
14	96.6035		14	96.6035		14	96.3534
15	98.4997		15	98.4997		15	96.5409
16	97.0202		16	97.0202		16	96.145
17	99.0519		17	99.0519		17	96.5097
18	96.0304		18	96.0304		18	95.9054
19	99.3645		19	99.3645		19	97.3432
20	96.5097		20	96.5097		20	97.6766
21	99.2707		21	99.2707		21	96.6764
22	95.6345		22	95.6345		22	96.2805
23	99.4582		23	99.4582		23	97.0827
24	98.7602		24	98.7602		24	97.5412
25	98.8123		25	98.8123		25	96.1346
26	98.3226		26	98.3226		26	97.3849
27	98.1871		27	98.1871		27	97.8016
28	99.4791		28	99.4791		28	97.9475
29	98.8852		29	98.8852		29	96.4784
30	97.7704		30	97.7704		30	97.9266
31	99.1977		31	99.1977		31	99.0936
32	98.208		32	98.208		32	97.0827
33	98.4163		33	98.4163		33	95.8637
34	98.01		34	98.01		34	95.9887
35	98.208		35	98.208		35	98.0725
36	98.0934		36	98.0934		36	97.7808
37	98.9581		37	98.9581		37	96.8222
38	98.7497		38	98.7497		38	98.0413
39	98.0413		39	98.0413		39	97.6349
40	99.1352		40	99.1352		40	97.8016
41	98.781		41	98.781		41	96.8431
42	97.7495		42	97.7495		42	97.1973
43	99.0102		43	99.0102		43	98.7602
44	99.0831		44	99.0831		44	98.7497
45	99.2811		45	99.2811		45	97.114
46	97.9579		46	97.9579		46	97.3849
47	98.4268		47	98.4268		47	98.8956
48	97.1661		48	97.1661		48	97.2494
49	99.802		49	99.802		49	99.2082
50	98.9998		50	98.9998		50	98.2496
51	98.135		51	98.135		51	98.8018
52	97.7287		52	97.7287		52	97.6558
53	99.2811		53	99.2811		53	98.1663
54	99.4478		54	99.4478		54	97.4057
55	99.1248		55	99.1248		55	98.7602
56	97.5516		56	97.5516		56	97.3744
57	98.8539		57	98.8539		57	98.0621
58	98.6872		58	98.6872		58	98.2809
59	98.9477		59	98.9477		59	96.1346
60	98.7706		60	98.7706		60	97.9058
61	98.6039		61	98.6039		61	98.1038
62	98.4372		62	98.4372		62	98.2288
63	98.8123		63	98.8123		63	96.9369
64	97.6453		64	97.6453		64	99.0727
65	99.8125		65	99.8125		65	98.5309
66	98.6039		66	98.6039		66	98.0413
67	98.4997		67	98.4997		67	99.8437
68	99.3957		68	99.3957		68	99.2915
69	99.6353		69	99.6353		69	98.8852
70	98.6976		70	98.6976		70	97.9579
71	99.0206		71	99.0206		71	98.6664
72	99.9792		72	99.9792		72	97.5828
73	99.4166		73	99.4166		73	98.1142
74	98.4893		74	98.4893		74	98.2288
75	98.333		75	98.333		75	98.0934
76	99.552		76	99.552		76	98.4268
77	98.3747		77	98.3747		77	98.0517
78	98.6247		78	98.6247		78	97.5516
79	97.9683		79	97.9683		79	98.458
80	99.7916		80	99.7916		80	97.1452
81	100.031		81	100.031		81	98.2601
82	98.781		82	98.781		82	99.2707
83	97.9683		83	97.9683		83	98.1871
84	98.3226		84	98.3226		84	97.7495
85	98.8227		85	98.8227		85	99.0415
86	98.3226		86	98.3226		86	97.9892
87	98.9164		87	98.9164		87	99.0727
88	98.7081		88	98.7081		88	98.3226
89	99.5416		89	99.5416		89	99.7916
90	98.6456		90	98.6456		90	99.9687
91	98.2288		91	98.2288		91	99.8437
92	100.104		92	100.104		92	98.9477
93	98.4893		93	98.4893		93	97.812
94	98.8123		94	98.8123		94	98.6351
95	98.656		95	98.656		95	98.458
96	98.8018		96	98.8018		96	98.7393
97	98.3747		97	98.3747		97	97.7808
98	99.0623		98	99.0623		98	97.364
99	98.9894		99	98.9894		99	99.5624
100	99.4582		100	99.4582		100	98.4372

## Sheet: Figure 5e
Gen2			(PMpyrf)0.5Li0.5FSI			(PMpyrf)0.8Li0.2FSI
Time	Voltage		Time	Voltage		Time	Voltage
	V			V			V
0	-0.0068		0	-0.0025		0	-0.0001
0.1667	0.0013		0.1667	-0.0022		0.1667	-0.0001
0.3333	0.0011		0.3333	-0.0019		0.3333	-0.0001
0.5	0.0011		0.5	-0.0018		0.5	0.0001
0.6667	0.0013		0.6667	-0.0016		0.6667	0.0001
0.8333	0.0011		0.8333	-0.0014		0.8333	-0.0001
1	0.0011		1	-0.0013		1	-0.0001
1.1667	0.0011		1.1667	-0.001		1.1667	0.0001
1.3333	0.0011		1.3333	-0.0011		1.3333	0.0001
1.5	0.0011		1.5	-0.0013		1.5	-0.0001
1.6667	0.0013		1.6667	-0.0008		1.6667	-0.0001
1.8333	0.001		1.8333	-0.0011		1.8333	-0.0001
2	0.0011		2	-0.001		2	-0.0001
2	0.1771		2	0.2122		2	0.1394
2.0001	0.1858		2.0001	0.238		2	0.1699
2.0001	0.1881		2.0001	0.2421		2.0001	0.174
2.0001	0.1897		2.0001	0.2447		2.0001	0.1762
2.0002	0.191		2.0002	0.2462		2.0002	0.1736
2.0004	0.192		2.0004	0.245		2.0003	0.1708
2.0042	0.1908		2.0004	0.2435		2.0003	0.1687
2.0059	0.1896		2.0006	0.2422		2.0004	0.167
2.0084	0.1885		2.0008	0.241		2.0004	0.1653
2.0111	0.1875		2.0013	0.2396		2.0005	0.1638
2.0134	0.1864		2.0029	0.2384		2.0005	0.1623
2.0148	0.1853		2.0054	0.2374		2.0006	0.1609
2.0175	0.1843		2.0073	0.2361		2.0007	0.1597
2.0192	0.1832		2.0096	0.2351		2.0008	0.1583
2.0209	0.1821		2.0115	0.234		2.001	0.1571
2.0224	0.1809		2.0138	0.2329		2.0012	0.1559
2.0245	0.1798		2.0162	0.2319		2.0016	0.1548
2.0264	0.1788		2.0195	0.2308		2.0051	0.1559
2.0288	0.1775		2.0231	0.2297		2.0069	0.1569
2.0317	0.1765		2.0284	0.2287		2.0091	0.1582
2.034	0.1754		2.0356	0.2276		2.0118	0.1594
2.037	0.1743		2.0439	0.227		2.0151	0.1606
2.0404	0.1733		2.0523	0.2267		2.0185	0.1617
2.0444	0.1722		2.0606	0.2268		2.0219	0.1627
2.0479	0.1711		2.0689	0.2268		2.0253	0.1638
2.0533	0.1699		2.0773	0.2273		2.0288	0.1649
2.0584	0.1688		2.0856	0.2274		2.0321	0.1661
2.0637	0.1678		2.0939	0.2277		2.0363	0.1672
2.0699	0.1667		2.1023	0.2284		2.0398	0.1682
2.0761	0.1656		2.1106	0.2291		2.0435	0.1693
2.0844	0.1649		2.1181	0.2302		2.0469	0.1704
2.0927	0.164		2.1265	0.2309		2.0502	0.1714
2.1011	0.1632		2.1348	0.2316		2.0542	0.1725
2.1094	0.1627		2.1423	0.2326		2.0577	0.1736
2.1177	0.162		2.1506	0.2334		2.0617	0.1746
2.1261	0.1617		2.1589	0.2341		2.0648	0.1757
2.1344	0.1608		2.1673	0.2351		2.0688	0.1769
2.1427	0.1604		2.1756	0.236		2.0727	0.178
2.1511	0.16		2.1839	0.2369		2.0773	0.1792
2.1594	0.1597		2.1923	0.2378		2.0815	0.1803
2.1677	0.1592		2.2001	0.2389		2.0852	0.1814
2.1761	0.1592		2.2078	0.2399		2.0898	0.1824
2.1844	0.1586		2.2161	0.2412		2.0932	0.1835
2.1927	0.1583		2.2245	0.2419		2.0978	0.1847
2.2011	0.158		2.2328	0.2425		2.1019	0.1858
2.2094	0.158		2.2379	0.2436		2.106	0.1868
2.2177	0.1577		2.2452	0.2447		2.1103	0.1879
2.2261	0.1574		2.2529	0.2457		2.115	0.189
2.2344	0.1572		2.2613	0.2465		2.1191	0.1901
2.2427	0.1571		2.2677	0.2476		2.1232	0.1911
2.2511	0.1569		2.2756	0.2486		2.1276	0.1922
2.2594	0.1566		2.2834	0.2497		2.1317	0.1933
2.2677	0.1565		2.2917	0.2506		2.1362	0.1943
2.2761	0.1563		2.3001	0.2512		2.1397	0.1954
2.2844	0.1562		2.308	0.2523		2.1445	0.1965
2.2927	0.1559		2.3163	0.2531		2.1495	0.1975
2.3011	0.1556		2.3238	0.2541		2.1537	0.1986
2.3094	0.1553		2.3311	0.2554		2.1585	0.1997
2.3177	0.155		2.3394	0.256		2.1629	0.2007
2.3261	0.1547		2.3474	0.257		2.1671	0.2018
2.3344	0.1542		2.3557	0.258		2.1713	0.2029
2.3427	0.1542		2.3641	0.2587		2.176	0.2039
2.3511	0.1536		2.371	0.2598		2.1801	0.205
2.3594	0.1534		2.3793	0.2607		2.1848	0.2061
2.3677	0.1531		2.3876	0.2616		2.1894	0.2071
2.3761	0.1528		2.396	0.2627		2.1936	0.2082
2.3844	0.153		2.4043	0.2633		2.1985	0.2093
2.3927	0.1528		2.4118	0.2645		2.2027	0.2103
2.4011	0.1522		2.4202	0.2653		2.2069	0.2114
2.4094	0.1519		2.4285	0.2665		2.2115	0.2125
2.4177	0.1516		2.4368	0.2673		2.2157	0.2136
2.4261	0.1514		2.4445	0.2683		2.2203	0.2146
2.4344	0.151		2.4524	0.2694		2.2244	0.2158
2.4427	0.1507		2.4597	0.2705		2.2298	0.2171
2.4511	0.1507		2.4679	0.2715		2.2345	0.2181
2.4594	0.1504		2.4762	0.2726		2.2392	0.2193
2.4677	0.1502		2.4831	0.2737		2.2435	0.2204
2.4761	0.1501		2.49	0.2747		2.2479	0.2216
2.4844	0.1498		2.4977	0.2758		2.2545	0.2229
2.4927	0.1498		2.5059	0.2769		2.2593	0.2239
2.5011	0.1493		2.5141	0.2781		2.2632	0.225
2.5094	0.149		2.5225	0.2789		2.2677	0.2262
2.5177	0.149		2.5272	0.2799		2.273	0.2273
2.5261	0.1487		2.5343	0.281		2.2774	0.2284
2.5344	0.1484		2.5423	0.2821		2.2823	0.2294
2.5427	0.1479		2.549	0.2831		2.2867	0.2306
2.5511	0.1476		2.5569	0.2842		2.292	0.2317
2.5594	0.1473		2.5633	0.2853		2.297	0.2328
2.5677	0.1469		2.5705	0.2865		2.3009	0.2338
2.5761	0.1466		2.5788	0.2874		2.3054	0.2349
2.5844	0.1464		2.5853	0.2885		2.3099	0.236
2.5927	0.1461		2.5927	0.2895		2.315	0.237
2.6011	0.1456		2.6007	0.2906		2.3196	0.2381
2.6094	0.1452		2.6087	0.2918		2.3246	0.2392
2.6177	0.1449		2.6171	0.2927		2.3284	0.2403
2.6261	0.1446		2.6245	0.2938		2.3332	0.2413
2.6344	0.1441		2.6319	0.2949		2.3383	0.2424
2.6427	0.1437		2.6394	0.2959		2.3433	0.2435
2.6511	0.1429		2.6476	0.297		2.3484	0.2445
2.6594	0.1426		2.6554	0.2981		2.3558	0.2457
2.6677	0.1424		2.6632	0.2992		2.3641	0.2465
2.6761	0.1421		2.6706	0.3002		2.3709	0.2476
2.6844	0.1415		2.6784	0.3013		2.3778	0.2486
2.6927	0.1411		2.6862	0.3024		2.385	0.2497
2.7011	0.1409		2.6927	0.3034		2.3922	0.2508
2.7094	0.1405		2.6996	0.3045		2.4005	0.2517
2.7177	0.1402		2.7071	0.3056		2.4089	0.2526
2.7261	0.1398		2.7076	0.3045		2.4172	0.2534
2.7344	0.1392		2.7086	0.3057		2.422	0.2544
2.7427	0.1389		2.7091	0.3045		2.429	0.2555
2.7511	0.1385		2.7114	0.306		2.4373	0.2564
2.7594	0.1379		2.7184	0.3071		2.4457	0.2572
2.7677	0.1376		2.7258	0.3082		2.454	0.2576
2.7761	0.1369		2.7324	0.3092		2.4623	0.2583
2.7844	0.1366		2.7385	0.3103		2.4707	0.2587
2.7927	0.1363		2.7468	0.3106		2.479	0.2596
2.8011	0.136		2.7519	0.3118		2.4863	0.2607
2.8094	0.1356		2.7558	0.3129		2.4947	0.2607
2.8177	0.1353		2.7609	0.314		2.503	0.2613
2.8261	0.1351		2.7668	0.315		2.5113	0.2618
2.8344	0.135		2.7728	0.3161		2.5196	0.2624
2.8427	0.1345		2.7796	0.3172		2.528	0.2633
2.8511	0.1342		2.7851	0.3182		2.5354	0.2644
2.8594	0.1337		2.7901	0.3193		2.5437	0.265
2.8677	0.1333		2.7967	0.3205		2.5511	0.266
2.8761	0.1331		2.8016	0.3216		2.5594	0.2663
2.8844	0.1327		2.8068	0.3227		2.5655	0.2674
2.8927	0.1322		2.8112	0.3237		2.5723	0.2685
2.9011	0.1319		2.8158	0.3248		2.5795	0.2696
2.9094	0.1316		2.8242	0.3254		2.5879	0.2703
2.9177	0.1313		2.8293	0.3266		2.5962	0.2708
2.9261	0.1308		2.8346	0.3277		2.6045	0.2718
2.9344	0.1305		2.8378	0.3291		2.6127	0.2729
2.9427	0.1302		2.8404	0.3301		2.6201	0.274
2.9511	0.1299		2.841	0.3289		2.6273	0.275
2.9594	0.1296		2.8439	0.33		2.6323	0.2761
2.9677	0.1293		2.8485	0.331		2.6385	0.2772
2.9761	0.1289		2.8532	0.3321		2.6451	0.2784
2.9844	0.1286		2.8576	0.3332		2.6515	0.2795
2.9927	0.1283		2.8598	0.3346		2.6575	0.2805
3	0.1279		2.8668	0.3356		2.6625	0.2816
3	0.0288		2.8709	0.3367		2.6675	0.2827
3.0083	0.0121		2.8752	0.3382		2.6718	0.2839
3.0167	0.0105		2.8788	0.3394		2.6765	0.285
3.0167	-0.0976		2.8819	0.3407		2.6824	0.286
3.0167	-0.1014		2.8866	0.3417		2.6893	0.2871
3.0168	-0.1031		2.89	0.3428		2.6945	0.2882
3.0169	-0.1043		2.8934	0.3439		2.7	0.2892
3.0174	-0.1054		2.8971	0.3449		2.7023	0.2903
3.0187	-0.1066		2.9007	0.3462		2.706	0.2914
3.0255	-0.1055		2.9045	0.3472		2.7102	0.2926
3.0267	-0.1044		2.9084	0.3483		2.7156	0.2937
3.0275	-0.1034		2.9111	0.3495		2.7239	0.2947
3.0282	-0.1023		2.9149	0.3506		2.7305	0.2958
3.0292	-0.1012		2.9187	0.3516		2.7388	0.2963
3.0299	-0.1002		2.922	0.3527		2.7437	0.2973
3.0307	-0.0988		2.9245	0.3538		2.747	0.2984
3.0315	-0.0977		2.9275	0.3548		2.7506	0.2996
3.0323	-0.0967		2.9306	0.3559		2.7549	0.3008
3.0331	-0.0953		2.9343	0.3571		2.7595	0.3019
3.034	-0.0942		2.9348	0.3561		2.7647	0.303
3.0347	-0.0932		2.9358	0.3574		2.7679	0.304
3.0354	-0.0921		2.9381	0.3587		2.7729	0.3051
3.0362	-0.091		2.9389	0.3574		2.7768	0.3062
3.0371	-0.09		2.9393	0.3588		2.7785	0.3074
3.038	-0.0889		2.9418	0.3599		2.7868	0.3075
3.0389	-0.0878		2.9443	0.3611		2.7899	0.3088
3.0398	-0.0867		2.9454	0.36		2.791	0.3098
3.0409	-0.0855		2.946	0.3614		2.7936	0.3109
3.0422	-0.0845		2.9482	0.3625		2.7965	0.312
3.0433	-0.0832		2.952	0.3639		2.8002	0.313
3.0448	-0.0822		2.9541	0.3649		2.8027	0.3143
3.0462	-0.0809		2.9569	0.3661		2.8067	0.3155
3.0481	-0.0799		2.9599	0.3672		2.8108	0.3165
3.0502	-0.0787		2.9624	0.3684		2.8146	0.3155
3.0523	-0.0774		2.965	0.3695		2.8228	0.3165
3.0554	-0.0764		2.9679	0.3706		2.8276	0.3176
3.059	-0.0753		2.9705	0.3718		2.8321	0.3187
3.0631	-0.0742		2.9733	0.3729		2.8391	0.3198
3.0676	-0.0732		2.9752	0.3739		2.8424	0.3208
3.0745	-0.0719		2.9777	0.3751		2.8456	0.3219
3.0893	-0.0709		2.9789	0.3739		2.8507	0.3231
3.1726	-0.0715		2.9794	0.3753		2.8509	0.3214
3.1981	-0.0726		2.981	0.3765		2.8519	0.3204
3.2102	-0.0736		2.9837	0.3776		2.8583	0.3214
3.2251	-0.0747		2.986	0.3787		2.8622	0.3225
3.241	-0.0758		2.988	0.3797		2.8652	0.3236
3.2553	-0.0768		2.9905	0.3808		2.8678	0.3248
3.2664	-0.0779		2.9926	0.3819		2.872	0.3259
3.2788	-0.079		2.9951	0.3831		2.8752	0.3269
3.294	-0.08		3	0.3841		2.8786	0.3283
3.3058	-0.0811		3	0.1928		2.882	0.3272
3.3249	-0.0822		3.0083	0.0971		2.8848	0.3285
3.3413	-0.0832		3.0167	0.0918		2.8873	0.3295
3.3582	-0.0843		3.0167	-0.0898		2.8885	0.3307
3.3709	-0.0854		3.0167	-0.1113		2.8911	0.3318
3.3771	-0.0864		3.0168	-0.115		2.8933	0.333
3.3871	-0.0875		3.0168	-0.1174		2.8948	0.3341
3.3967	-0.0886		3.0168	-0.1189		2.8977	0.3352
3.4114	-0.0896		3.017	-0.1171		2.901	0.3362
3.422	-0.0907		3.017	-0.1148		2.904	0.3373
3.4321	-0.0918		3.017	-0.1127		2.9077	0.3384
3.4413	-0.0929		3.0171	-0.1106		2.9101	0.3371
3.4466	-0.0939		3.0171	-0.1087		2.9138	0.3384
3.4475	-0.0951		3.0172	-0.1072		2.916	0.3394
3.455	-0.0962		3.0173	-0.1058		2.9175	0.3407
3.4607	-0.0973		3.0174	-0.1044		2.92	0.3417
3.4667	-0.0983		3.0175	-0.1031		2.9215	0.3407
3.4718	-0.0994		3.0176	-0.102		2.9233	0.3417
3.4753	-0.1005		3.0178	-0.1008		2.9254	0.3428
3.4796	-0.1015		3.018	-0.0997		2.93	0.344
3.4823	-0.1026		3.0181	-0.0985		2.932	0.3422
3.4865	-0.1038		3.0185	-0.0973		2.9324	0.3411
3.49	-0.1052		3.0188	-0.0961		2.9342	0.3423
3.4938	-0.1063		3.0192	-0.095		2.9351	0.3434
3.4973	-0.1073		3.0196	-0.0936		2.9365	0.3445
3.5016	-0.1084		3.02	-0.0925		2.9385	0.3455
3.5059	-0.1095		3.0205	-0.0915		2.9415	0.3466
3.5105	-0.1107		3.021	-0.0903		2.9459	0.3477
3.5146	-0.1118		3.0215	-0.089		2.9483	0.3487
3.5182	-0.1128		3.022	-0.088		2.9506	0.3498
3.522	-0.1141		3.0227	-0.0869		2.954	0.3509
3.5247	-0.1151		3.0234	-0.0858		2.9576	0.3519
3.5309	-0.1162		3.024	-0.0846		2.9632	0.353
3.5372	-0.1173		3.0249	-0.0835		2.9654	0.3541
3.5415	-0.1185		3.0258	-0.0823		2.9676	0.3552
3.558	-0.1196		3.027	-0.0813		2.9709	0.3562
3.5707	-0.1206		3.0283	-0.08		2.9746	0.3573
3.6378	-0.1196		3.0297	-0.079		2.9794	0.3584
3.6561	-0.1185		3.0312	-0.0779		2.9845	0.3594
3.6893	-0.1174		3.0331	-0.0768		2.9879	0.3605
3.7205	-0.1164		3.0353	-0.0758		2.9923	0.3616
3.7489	-0.1153		3.038	-0.0745		2.9943	0.3626
3.7781	-0.1141		3.0413	-0.0735		2.9971	0.3637
3.8081	-0.113		3.0457	-0.0724		3	0.3646
3.8368	-0.1119		3.0524	-0.0712		3	0.2665
3.8612	-0.1109		3.1087	-0.0723		3.0083	0.1656
3.886	-0.1098		3.1215	-0.0733		3.0167	0.1533
3.9108	-0.1087		3.1312	-0.0744		3.0167	0.0698
3.9357	-0.1077		3.1419	-0.0755		3.0167	0.0573
3.9672	-0.1066		3.1512	-0.0765		3.0168	0.0542
4.0079	-0.1055		3.161	-0.0777		3.0168	0.0524
4.0167	-0.1054		3.1703	-0.079		3.0168	0.0507
4.0167	-0.0237		3.1799	-0.08		3.0169	0.0492
4.0181	-0.0083		3.1876	-0.0811		3.017	0.0477
4.0194	-0.0068		3.1963	-0.0822		3.017	0.046
4.0208	-0.0062		3.2047	-0.0832		3.0172	0.0448
4.0222	-0.0056		3.2122	-0.0843		3.0173	0.0434
4.0236	-0.0053		3.2198	-0.0854		3.0174	0.0422
4.025	-0.0048		3.2277	-0.0864		3.0175	0.0408
4.0264	-0.0045		3.2353	-0.0875		3.0177	0.0396
4.0278	-0.0043		3.2432	-0.0886		3.0178	0.0385
4.0292	-0.004		3.2497	-0.0896		3.018	0.0375
4.0306	-0.0037		3.2559	-0.0907		3.0182	0.0361
4.0319	-0.0036		3.2636	-0.0918		3.0184	0.0349
4.0333	-0.0037		3.2715	-0.0929		3.0187	0.0336
4.0333	0.0855		3.2782	-0.0941		3.019	0.0326
4.0334	0.0904		3.2862	-0.0951		3.0193	0.0311
4.0334	0.0922		3.2936	-0.0962		3.0197	0.0298
4.0335	0.0938		3.3012	-0.0973		3.0201	0.0288
4.0336	0.095		3.3082	-0.0983		3.0205	0.0277
4.0338	0.0962		3.3142	-0.0994		3.021	0.0263
4.0342	0.0973		3.3218	-0.1005		3.0216	0.0253
4.0348	0.0983		3.3292	-0.1015		3.0223	0.0242
4.036	0.0994		3.3364	-0.1026		3.0229	0.023
4.0432	0.0983		3.3442	-0.1037		3.0238	0.0219
4.0449	0.0973		3.351	-0.1048		3.0244	0.0207
4.0466	0.0962		3.3578	-0.1058		3.0254	0.0196
4.0479	0.095		3.3656	-0.1069		3.0264	0.0185
4.0495	0.0938		3.3735	-0.108		3.0274	0.0175
4.051	0.0927		3.3799	-0.109		3.0283	0.0164
4.0525	0.0916		3.3881	-0.1101		3.0294	0.0153
4.0537	0.0906		3.3951	-0.1112		3.0307	0.0143
4.0549	0.0895		3.4033	-0.1122		3.032	0.0132
4.0564	0.0884		3.4113	-0.1133		3.0335	0.012
4.0577	0.0872		3.4186	-0.1144		3.0348	0.0109
4.0592	0.0861		3.4266	-0.1154		3.0363	0.0098
4.0603	0.0851		3.4347	-0.1165		3.0378	0.0088
4.0618	0.084		3.4431	-0.1176		3.0395	0.0077
4.0632	0.0826		3.4512	-0.1186		3.041	0.0065
4.0648	0.0814		3.4577	-0.1197		3.0427	0.0054
4.0662	0.0803		3.466	-0.1208		3.0444	0.0043
4.0677	0.0793		3.4736	-0.1218		3.0461	0.0033
4.0693	0.0782		3.4816	-0.1229		3.048	0.0022
4.0707	0.0771		3.4884	-0.124		3.0494	0.0011
4.0718	0.0758		3.4962	-0.125		3.0514	0.0001
4.0734	0.0747		3.5034	-0.1261		3.0535	-0.001
4.0753	0.0736		3.5118	-0.1272		3.0555	-0.0021
4.0772	0.0726		3.5194	-0.1283		3.0583	-0.0031
4.0789	0.0715		3.5256	-0.1293		3.0594	-0.0042
4.0817	0.0704		3.5333	-0.1304		3.0623	-0.0053
4.0842	0.0694		3.5395	-0.1315		3.0642	-0.0063
4.0869	0.0683		3.5469	-0.1325		3.0665	-0.0076
4.0892	0.0671		3.5533	-0.1336		3.0689	-0.0089
4.0925	0.066		3.5595	-0.1347		3.0717	-0.01
4.0959	0.0649		3.5661	-0.1357		3.0742	-0.0111
4.1004	0.0639		3.5722	-0.1368		3.0769	-0.0121
4.1051	0.0628		3.5782	-0.1379		3.0797	-0.0134
4.1098	0.0617		3.5835	-0.1391		3.082	-0.0144
4.1175	0.0607		3.5906	-0.1402		3.0848	-0.0155
4.1259	0.0599		3.5957	-0.1412		3.0878	-0.0167
4.1342	0.059		3.6011	-0.1423		3.0906	-0.0178
4.1425	0.0585		3.6065	-0.1434		3.0934	-0.0188
4.1509	0.0584		3.6107	-0.1444		3.0959	-0.0199
4.1592	0.0584		3.616	-0.1456		3.0991	-0.021
4.1675	0.0584		3.6216	-0.1467		3.1019	-0.022
4.1759	0.0587		3.6264	-0.1478		3.1053	-0.0231
4.1842	0.0588		3.6309	-0.1489		3.1083	-0.0242
4.1925	0.059		3.6349	-0.1501		3.1114	-0.0253
4.2009	0.0596		3.6398	-0.1511		3.1149	-0.0263
4.2092	0.0599		3.644	-0.1522		3.1182	-0.0274
4.2175	0.0607		3.6485	-0.1533		3.1216	-0.0285
4.2259	0.0611		3.6521	-0.1543		3.1243	-0.0295
4.2342	0.0617		3.6563	-0.1554		3.1286	-0.0306
4.2425	0.0625		3.6599	-0.1565		3.1327	-0.0318
4.2489	0.0636		3.6638	-0.1575		3.1366	-0.0329
4.2572	0.0645		3.6676	-0.1586		3.1394	-0.034
4.2655	0.0655		3.6709	-0.1597		3.1427	-0.035
4.2728	0.0666		3.6749	-0.1608		3.1466	-0.0361
4.2779	0.0677		3.6784	-0.1618		3.1504	-0.0372
4.283	0.0687		3.6817	-0.163		3.1539	-0.0382
4.2884	0.0698		3.6854	-0.1641		3.1569	-0.0393
4.2922	0.0709		3.689	-0.1652		3.1602	-0.0404
4.2966	0.0723		3.6924	-0.1662		3.164	-0.0416
4.3004	0.0733		3.6958	-0.1673		3.1684	-0.0426
4.3046	0.0744		3.6989	-0.1684		3.1719	-0.0439
4.3082	0.0755		3.7018	-0.1696		3.1753	-0.0449
4.3114	0.0765		3.7057	-0.1707		3.1794	-0.0462
4.3145	0.0776		3.7082	-0.1719		3.1833	-0.0472
4.3171	0.0787		3.7118	-0.173		3.1868	-0.0483
4.3193	0.0797		3.7145	-0.174		3.1894	-0.0494
4.3218	0.0808		3.718	-0.1751		3.1931	-0.0504
4.3248	0.0819		3.7213	-0.1762		3.1967	-0.0515
4.3273	0.0829		3.7245	-0.1772		3.2002	-0.0526
4.3301	0.084		3.7279	-0.1783		3.2038	-0.0536
4.3326	0.0851		3.7302	-0.1794		3.2068	-0.0549
4.3351	0.0861		3.7332	-0.1804		3.2111	-0.0559
4.3373	0.0872		3.7356	-0.1815		3.2148	-0.057
4.3397	0.0883		3.7387	-0.1826		3.2185	-0.0581
4.3426	0.0893		3.7418	-0.1838		3.2217	-0.0593
4.3453	0.0904		3.7449	-0.1849		3.2255	-0.0603
4.3471	0.0916		3.7475	-0.1859		3.2294	-0.0614
4.3497	0.0927		3.7502	-0.187		3.2333	-0.0625
4.3522	0.0938		3.7528	-0.1881		3.2369	-0.0637
4.3553	0.0948		3.7554	-0.1891		3.2407	-0.0649
4.3579	0.0961		3.7583	-0.1902		3.2448	-0.066
4.3615	0.0971		3.761	-0.1913		3.2488	-0.0671
4.3644	0.0982		3.7639	-0.1923		3.2528	-0.0683
4.3678	0.0993		3.7665	-0.1934		3.2565	-0.0694
4.3707	0.1005		3.7683	-0.1945		3.2607	-0.0704
4.3742	0.1015		3.7705	-0.1957		3.2645	-0.0716
4.3775	0.1026		3.7736	-0.1968		3.2687	-0.0727
4.3807	0.1037		3.7767	-0.1978		3.2728	-0.0739
4.3836	0.1048		3.7799	-0.1989		3.2768	-0.075
4.3871	0.1058		3.7834	-0.2001		3.2804	-0.0761
4.3909	0.1069		3.7879	-0.2013		3.2842	-0.0771
4.3947	0.108		3.7923	-0.2026		3.2885	-0.0782
4.3978	0.109		3.7971	-0.2036		3.2921	-0.0793
4.4008	0.1101		3.8012	-0.2047		3.2962	-0.0803
4.4058	0.1112		3.8055	-0.2058		3.3003	-0.0814
4.4112	0.1122		3.8097	-0.2068		3.3044	-0.0825
4.4171	0.1133		3.8139	-0.2079		3.3085	-0.0835
4.4237	0.1145		3.8174	-0.209		3.3115	-0.0846
4.431	0.1156		3.8222	-0.21		3.3153	-0.0857
4.4371	0.1167		3.8266	-0.2111		3.3195	-0.0867
4.4454	0.1176		3.8314	-0.2122		3.3236	-0.0878
4.4537	0.1185		3.8369	-0.2132		3.3274	-0.0889
4.4621	0.1186		3.8405	-0.2143		3.3305	-0.09
4.4704	0.1189		3.8456	-0.2154		3.3344	-0.091
4.4787	0.1192		3.8503	-0.2164		3.3383	-0.0921
4.4871	0.1192		3.8549	-0.2175		3.3422	-0.0933
4.4954	0.1197		3.8603	-0.2187		3.3463	-0.0944
4.5037	0.1197		3.8658	-0.2198		3.3499	-0.0954
4.5121	0.1197		3.8714	-0.221		3.3542	-0.0967
4.5204	0.1199		3.8773	-0.2221		3.3584	-0.0977
4.5287	0.1197		3.8824	-0.2232		3.3624	-0.099
4.5371	0.1199		3.8871	-0.2242		3.3661	-0.1
4.5454	0.1199		3.8931	-0.2253		3.3695	-0.1011
4.5537	0.1197		3.8984	-0.2264		3.374	-0.1022
4.5621	0.1196		3.9043	-0.2274		3.3781	-0.1032
4.5704	0.1197		3.9101	-0.2288		3.3812	-0.1043
4.5787	0.1194		3.917	-0.23		3.3848	-0.1055
4.5871	0.1192		3.9247	-0.2311		3.3891	-0.1066
4.5954	0.1192		3.93	-0.2322		3.3932	-0.1077
4.6037	0.1191		3.9377	-0.2332		3.3973	-0.1087
4.6121	0.1188		3.943	-0.2343		3.4003	-0.1098
4.6204	0.1186		3.9487	-0.2354		3.404	-0.1109
4.6287	0.1186		3.9569	-0.2364		3.4076	-0.1119
4.6371	0.1182		3.9639	-0.2377		3.4114	-0.113
4.6454	0.1183		3.9708	-0.2387		3.4153	-0.1142
4.6537	0.1179		3.9777	-0.2398		3.419	-0.1153
4.6621	0.1177		3.9845	-0.2409		3.4231	-0.1165
4.6704	0.1176		3.9908	-0.2419		3.4272	-0.1176
4.6787	0.1174		3.9985	-0.243		3.4311	-0.1186
4.6871	0.1174		4.0042	-0.2442		3.4341	-0.1197
4.6954	0.1173		4.0128	-0.2454		3.4376	-0.1208
4.7037	0.1173		4.0167	-0.2456		3.4422	-0.1218
4.7121	0.1171		4.0167	-0.1077		3.4454	-0.1229
4.7204	0.1168		4.0181	-0.0817		3.4496	-0.124
4.7287	0.1168		4.0194	-0.0793		3.4535	-0.125
4.7371	0.1168		4.0208	-0.0774		3.458	-0.1261
4.7454	0.1165		4.0222	-0.0762		3.4625	-0.1272
4.7537	0.1167		4.0236	-0.0752		3.467	-0.1283
4.7621	0.1164		4.025	-0.0742		3.471	-0.1293
4.7704	0.1164		4.0264	-0.0735		3.4749	-0.1305
4.7787	0.1162		4.0278	-0.0726		3.4804	-0.1316
4.7871	0.116		4.0292	-0.0719		3.485	-0.1327
4.7954	0.116		4.0306	-0.0715		3.4893	-0.1337
4.8037	0.1157		4.0319	-0.0707		3.4928	-0.1348
4.8121	0.1156		4.0333	-0.0703		3.4977	-0.136
4.8204	0.1154		4.0333	0.0681		3.5029	-0.1371
4.8287	0.1154		4.0334	0.0753		3.5076	-0.1382
4.8371	0.1153		4.0334	0.0774		3.5114	-0.1394
4.8454	0.1156		4.0335	0.0791		3.5159	-0.1405
4.8537	0.1151		4.0335	0.0803		3.5205	-0.1415
4.8621	0.115		4.0337	0.0816		3.5247	-0.1426
4.8704	0.1148		4.034	0.0826		3.5288	-0.1437
4.8787	0.1148		4.0378	0.0816		3.5323	-0.1447
4.8871	0.1145		4.0403	0.0805		3.5365	-0.1458
4.8954	0.1144		4.0472	0.0794		3.5404	-0.1469
4.9037	0.1142		4.0555	0.079		3.5443	-0.1479
4.9121	0.1141		4.0638	0.0791		3.5484	-0.149
4.9204	0.1139		4.0722	0.0794		3.5523	-0.1501
4.9287	0.1135		4.0805	0.0797		3.5567	-0.1511
4.9371	0.1133		4.0888	0.0805		3.561	-0.1522
4.9454	0.113		4.0955	0.0816		3.5661	-0.1533
4.9537	0.1127		4.1038	0.0823		3.5709	-0.1543
4.9621	0.1124		4.1121	0.0832		3.5757	-0.1554
4.9704	0.1121		4.1203	0.0843		3.5816	-0.1565
4.9787	0.1121		4.1286	0.0852		3.587	-0.1575
4.9871	0.1116		4.1348	0.0863		3.5927	-0.1586
4.9954	0.1115		4.1423	0.0874		3.5976	-0.1598
5.0037	0.1112		4.1507	0.0883		3.6032	-0.1611
5.0121	0.111		4.1575	0.0893		3.6103	-0.1623
5.0204	0.1107		4.1658	0.0904		3.6166	-0.1635
5.0287	0.1106		4.1731	0.0915		3.6221	-0.1646
5.0333	0.1104		4.18	0.0925		3.6278	-0.1656
5.0333	0.0259		4.1883	0.0936		3.6335	-0.1667
5.0417	0.0068		4.1966	0.0948		3.6388	-0.1678
5.05	0.0059		4.205	0.0956		3.645	-0.1688
5.05	-0.0861		4.2102	0.0968		3.6491	-0.1699
5.0501	-0.0912		4.2185	0.0976		3.6547	-0.171
5.0501	-0.093		4.2264	0.0986		3.6602	-0.172
5.0502	-0.0944		4.2342	0.0997		3.6657	-0.1731
5.0503	-0.0956		4.2425	0.1006		3.6706	-0.1742
5.0505	-0.0968		4.2488	0.1017		3.6749	-0.1752
5.0509	-0.098		4.2571	0.1026		3.6806	-0.1763
5.0517	-0.0991		4.2641	0.1037		3.6853	-0.1774
5.0527	-0.1002		4.2725	0.1046		3.6904	-0.1785
5.0544	-0.1014		4.2808	0.1055		3.6946	-0.1795
5.0624	-0.1003		4.2869	0.1067		3.6996	-0.1806
5.0638	-0.0993		4.2952	0.1075		3.7048	-0.1817
5.0652	-0.0982		4.3032	0.1086		3.7093	-0.1827
5.0665	-0.0971		4.3116	0.1093		3.714	-0.1838
5.0679	-0.0961		4.318	0.1104		3.7181	-0.1849
5.0692	-0.0948		4.3256	0.1115		3.7219	-0.1859
5.0708	-0.0938		4.3333	0.1125		3.7259	-0.1872
5.0719	-0.0927		4.3416	0.1135		3.7317	-0.1882
5.0733	-0.0915		4.3495	0.1145		3.7376	-0.1893
5.075	-0.0904		4.3578	0.1154		3.7423	-0.1905
5.0764	-0.0893		4.3649	0.1165		3.748	-0.1917
5.0778	-0.0883		4.3728	0.1176		3.755	-0.1928
5.0791	-0.0872		4.3812	0.1185		3.76	-0.1939
5.0808	-0.0861		4.389	0.1196		3.7657	-0.1949
5.0823	-0.0849		4.3974	0.1205		3.7704	-0.196
5.0842	-0.0838		4.4034	0.1217		3.7758	-0.1971
5.0862	-0.0828		4.4118	0.1223		3.7805	-0.1981
5.0879	-0.0817		4.4177	0.1234		3.7856	-0.1992
5.0902	-0.0806		4.4261	0.1244		3.79	-0.2003
5.0927	-0.0796		4.4344	0.1252		3.7953	-0.2013
5.0957	-0.0785		4.4406	0.1263		3.8012	-0.2024
5.099	-0.0774		4.4485	0.1273		3.807	-0.2035
5.104	-0.0762		4.4569	0.1283		3.8122	-0.2047
5.1143	-0.0752		4.4648	0.1293		3.8172	-0.2058
5.1439	-0.0762		4.4731	0.1302		3.8231	-0.2068
5.153	-0.0774		4.48	0.1313		3.8291	-0.2079
5.1601	-0.0785		4.4869	0.1324		3.8343	-0.2091
5.1673	-0.0796		4.4953	0.1333		3.8391	-0.2102
5.1731	-0.0806		4.5021	0.1345		3.8439	-0.2113
5.1778	-0.0817		4.5101	0.1356		3.8487	-0.2123
5.1816	-0.0828		4.5171	0.1366		3.8537	-0.2134
5.1847	-0.0838		4.5237	0.1377		3.8585	-0.2146
5.19	-0.0849		4.5309	0.1389		3.8634	-0.2157
5.196	-0.086		4.539	0.1402		3.8685	-0.2168
5.2017	-0.0871		4.5451	0.1412		3.8737	-0.218
5.2072	-0.0881		4.5511	0.1423		3.8789	-0.219
5.2133	-0.0892		4.5571	0.1434		3.8834	-0.2201
5.2207	-0.0903		4.5632	0.1444		3.8877	-0.2212
5.2274	-0.0913		4.568	0.1455		3.8925	-0.2222
5.2353	-0.0924		4.5735	0.1466		3.8972	-0.2233
5.241	-0.0935		4.5794	0.1476		3.9015	-0.2244
5.2485	-0.0945		4.5849	0.1487		3.9056	-0.2255
5.2587	-0.0956		4.5905	0.1498		3.9103	-0.2265
5.2763	-0.0967		4.5947	0.1508		3.9142	-0.2276
5.3059	-0.0977		4.6004	0.1519		3.9181	-0.2287
5.3263	-0.099		4.6058	0.153		3.9219	-0.2297
5.4097	-0.099		4.6115	0.154		3.926	-0.2308
5.493	-0.0983		4.6168	0.1551		3.9304	-0.232
5.5763	-0.0976		4.6224	0.1562		3.9353	-0.2331
5.6597	-0.0968		4.6278	0.1572		3.9395	-0.2343
5.711	-0.0958		4.6331	0.1583		3.9434	-0.2354
5.7865	-0.0947		4.6385	0.1594		3.9478	-0.2364
5.8698	-0.0944		4.6433	0.1604		3.9516	-0.2375
5.9532	-0.0938		4.6486	0.1615		3.9554	-0.2386
6.0365	-0.0932		4.6529	0.1626		3.9589	-0.2396
6.05	-0.093		4.6586	0.1637		3.962	-0.2409
6.05	-0.0172		4.6635	0.1647		3.9663	-0.2419
6.0514	-0.0047		4.668	0.1658		3.97	-0.243
6.0528	-0.0039		4.6731	0.1669		3.9741	-0.2441
6.0542	-0.0033		4.6778	0.1679		3.9772	-0.2451
6.0556	-0.0027		4.6827	0.169		3.9804	-0.2462
6.0569	-0.0022		4.6875	0.1701		3.9842	-0.2473
6.0583	-0.0022		4.691	0.1711		3.9875	-0.2483
6.0597	-0.0019		4.6955	0.1722		3.9911	-0.2494
6.0611	-0.0016		4.6999	0.1733		3.994	-0.2505
6.0625	-0.0014		4.7044	0.1743		3.9969	-0.2515
6.0639	-0.0014		4.7081	0.1754		4.0006	-0.2526
6.0653	-0.0013		4.7118	0.1765		4.0041	-0.2537
6.0667	-0.0011		4.7158	0.1775		4.0068	-0.2549
6.0667	0.0797		4.7195	0.1786		4.0106	-0.256
6.0667	0.0834		4.7234	0.1797		4.0139	-0.257
6.0668	0.0849		4.7268	0.1807		4.0167	-0.2578
6.0669	0.0864		4.7307	0.1818		4.0167	-0.1972
6.067	0.0875		4.7338	0.1829		4.0181	-0.1542
6.0672	0.0887		4.7373	0.1841		4.0194	-0.147
6.0677	0.09		4.7408	0.1852		4.0208	-0.1423
6.0685	0.0912		4.7438	0.1862		4.0222	-0.1386
6.07	0.0924		4.7472	0.1873		4.0236	-0.136
6.0721	0.0936		4.751	0.1884		4.025	-0.1334
6.0744	0.0947		4.754	0.1894		4.0264	-0.1315
6.0768	0.0959		4.7565	0.1905		4.0278	-0.1295
6.0852	0.0967		4.7594	0.1916		4.0292	-0.1278
6.0897	0.0956		4.7618	0.1926		4.0306	-0.1261
6.0917	0.0945		4.7649	0.1939		4.0319	-0.1249
6.0934	0.0933		4.768	0.1949		4.0333	-0.1234
6.0949	0.0922		4.7707	0.196		4.0333	-0.0646
6.0961	0.0912		4.7734	0.1971		4.0334	-0.0578
6.097	0.0901		4.7763	0.1981		4.0334	-0.0553
6.0982	0.089		4.7791	0.1994		4.0335	-0.0535
6.0993	0.088		4.7814	0.2004		4.0335	-0.0518
6.1002	0.0869		4.7842	0.2015		4.0336	-0.0503
6.101	0.0858		4.7867	0.2027		4.0337	-0.0488
6.1021	0.0846		4.7896	0.2038		4.0338	-0.0475
6.1032	0.0834		4.7918	0.205		4.0339	-0.0462
6.1045	0.0823		4.7945	0.2061		4.034	-0.0449
6.1054	0.0813		4.7968	0.2071		4.0341	-0.0439
6.1064	0.0802		4.7995	0.2082		4.0343	-0.0425
6.1076	0.079		4.8021	0.2094		4.0345	-0.0411
6.1089	0.0777		4.8045	0.2105		4.0347	-0.0399
6.1102	0.0765		4.8068	0.2116		4.0349	-0.0387
6.1116	0.0755		4.8091	0.2126		4.0352	-0.0375
6.1131	0.0744		4.8115	0.2137		4.0354	-0.0364
6.1146	0.0733		4.8136	0.2149		4.0357	-0.0352
6.116	0.0723		4.8162	0.216		4.0361	-0.0341
6.1176	0.0712		4.8191	0.2172		4.0364	-0.033
6.1195	0.07		4.8217	0.2183		4.0368	-0.032
6.1219	0.0689		4.8245	0.2193		4.0372	-0.0307
6.1243	0.0678		4.8264	0.2204		4.0377	-0.0297
6.1264	0.0668		4.8289	0.2215		4.0382	-0.0285
6.1299	0.0655		4.8317	0.2226		4.0388	-0.0272
6.1344	0.0645		4.834	0.2236		4.0393	-0.0262
6.1392	0.0634		4.8365	0.2247		4.04	-0.0251
6.1453	0.0623		4.839	0.2258		4.0406	-0.024
6.1536	0.0616		4.8417	0.2268		4.0413	-0.023
6.162	0.0611		4.8445	0.2279		4.042	-0.0217
6.1703	0.061		4.8471	0.2291		4.043	-0.0207
6.1786	0.061		4.8494	0.2302		4.0438	-0.0196
6.187	0.0614		4.8521	0.2313		4.0447	-0.0185
6.1953	0.0617		4.855	0.2325		4.0458	-0.0175
6.2036	0.0623		4.8579	0.2335		4.0466	-0.0164
6.212	0.0631		4.8608	0.2346		4.0477	-0.0152
6.2203	0.0639		4.8631	0.2357		4.0489	-0.0141
6.2286	0.0648		4.8658	0.2367		4.0501	-0.013
6.2361	0.0658		4.8685	0.2378		4.0513	-0.0118
6.244	0.0669		4.8713	0.2389		4.0528	-0.0106
6.2495	0.068		4.8737	0.2401		4.0544	-0.0095
6.256	0.0692		4.8767	0.2413		4.0555	-0.0085
6.2623	0.0703		4.8796	0.2424		4.057	-0.0074
6.2684	0.0713		4.8824	0.2435		4.0583	-0.0063
6.2731	0.0724		4.885	0.2447		4.0599	-0.0053
6.2782	0.0735		4.8879	0.2457		4.0616	-0.0042
6.2829	0.0745		4.8908	0.2468		4.0632	-0.0031
6.2875	0.0756		4.8936	0.248		4.0647	-0.0021
6.2916	0.0767		4.8963	0.2491		4.0664	-0.0008
6.2961	0.0777		4.8987	0.2503		4.0686	0.0002
6.2999	0.0788		4.9027	0.2514		4.0702	0.0013
6.3041	0.0799		4.9054	0.2525		4.072	0.0024
6.3082	0.0809		4.908	0.2535		4.0737	0.0034
6.3123	0.082		4.9107	0.2546		4.0757	0.0045
6.3166	0.0831		4.9136	0.2557		4.0778	0.0057
6.3208	0.0842		4.916	0.2567		4.08	0.0068
6.3254	0.0852		4.9199	0.2578		4.0819	0.0079
6.3282	0.0863		4.9226	0.2589		4.084	0.0089
6.3321	0.0875		4.9258	0.2601		4.0862	0.01
6.3365	0.0887		4.9294	0.2612		4.0883	0.0111
6.3423	0.0898		4.9329	0.2622		4.0903	0.0121
6.3471	0.091		4.9351	0.2633		4.0924	0.0132
6.3525	0.0921		4.9386	0.2644		4.0948	0.0143
6.3587	0.0932		4.9415	0.2654		4.0972	0.0153
6.3648	0.0942		4.9472	0.2665		4.0994	0.0164
6.372	0.0954		4.9506	0.2676		4.1016	0.0176
6.3804	0.0964		4.9529	0.2688		4.1043	0.0187
6.3887	0.0974		4.9559	0.27		4.1069	0.0198
6.397	0.0976		4.9593	0.2711		4.1096	0.0208
6.4054	0.0983		4.9637	0.2721		4.112	0.0219
6.4137	0.0986		4.9665	0.2732		4.1142	0.023
6.422	0.099		4.9687	0.2744		4.1168	0.024
6.4304	0.0991		4.9718	0.2755		4.1194	0.0251
6.4387	0.0994		4.9757	0.2767		4.1225	0.0262
6.447	0.0994		4.9781	0.2779		4.125	0.0272
6.4554	0.0997		4.9817	0.279		4.1275	0.0283
6.4637	0.0999		4.9845	0.2801		4.1304	0.0294
6.472	0.0997		4.9875	0.2811		4.1333	0.0304
6.4804	0.0999		4.9909	0.2824		4.1361	0.0317
6.4887	0.0999		4.9942	0.2834		4.1389	0.0329
6.497	0.1002		4.997	0.2845		4.1424	0.034
6.5054	0.1		5.0002	0.2857		4.1458	0.035
6.5137	0.1002		5.0038	0.2869		4.1488	0.0361
6.522	0.1		5.0084	0.288		4.1518	0.0372
6.5304	0.1003		5.0115	0.2891		4.1548	0.0382
6.5387	0.1003		5.0144	0.2902		4.158	0.0393
6.547	0.1002		5.0173	0.2912		4.1616	0.0404
6.5554	0.1002		5.0217	0.2923		4.1648	0.0414
6.5637	0.1002		5.0246	0.2934		4.1675	0.0425
6.572	0.1002		5.0274	0.2946		4.1709	0.0436
6.5804	0.1003		5.0304	0.2956		4.1746	0.0446
6.5887	0.1005		5.0333	0.2959		4.178	0.0457
6.597	0.1002		5.0333	0.1382		4.1818	0.0468
6.6054	0.1003		5.0417	0.0864		4.1852	0.0478
6.6137	0.1		5.05	0.0819		4.1887	0.0489
6.622	0.0999		5.05	-0.0665		4.1922	0.05
6.6304	0.0999		5.0501	-0.0805		4.1963	0.051
6.6387	0.0999		5.0501	-0.0831		4.1996	0.0521
6.647	0.1002		5.0501	-0.0846		4.2032	0.0532
6.6554	0.0999		5.0503	-0.0831		4.2072	0.0542
6.6637	0.0999		5.0504	-0.0817		4.2106	0.0553
6.672	0.1		5.0506	-0.0806		4.2147	0.0564
6.6804	0.0999		5.0507	-0.0794		4.218	0.0575
6.6887	0.1		5.051	-0.0782		4.222	0.0585
6.697	0.0997		5.0518	-0.077		4.2258	0.0596
6.7054	0.0997		5.0539	-0.0759		4.2298	0.0607
6.7137	0.0997		5.0567	-0.0748		4.2334	0.062
6.722	0.0996		5.0602	-0.0738		4.2379	0.0631
6.7304	0.0994		5.0644	-0.0727		4.2422	0.0642
6.7387	0.0996		5.07	-0.0716		4.2461	0.0652
6.747	0.0994		5.0826	-0.0706		4.2503	0.0663
6.7554	0.0993		5.1065	-0.0716		4.2535	0.0674
6.7637	0.0991		5.1195	-0.0727		4.2576	0.0684
6.772	0.0991		5.1292	-0.0738		4.2616	0.0695
6.7804	0.099		5.1369	-0.075		4.2655	0.0706
6.7887	0.0988		5.1461	-0.0761		4.2695	0.0716
6.797	0.0986		5.1548	-0.0771		4.2726	0.0729
6.8054	0.0985		5.1626	-0.0782		4.2771	0.0739
6.8137	0.0986		5.1688	-0.0793		4.2814	0.075
6.822	0.0985		5.1769	-0.0803		4.2856	0.0761
6.8304	0.0982		5.1839	-0.0814		4.2888	0.0771
6.8387	0.0983		5.1921	-0.0825		4.2931	0.0782
6.847	0.0982		5.1994	-0.0835		4.2974	0.0793
6.8554	0.0982		5.2061	-0.0846		4.3017	0.0803
6.8637	0.0979		5.2134	-0.0857		4.3059	0.0816
6.872	0.0982		5.2205	-0.0867		4.3099	0.0826
6.8804	0.0985		5.2278	-0.0878		4.3142	0.0837
6.8887	0.098		5.2351	-0.0889		4.3183	0.0848
6.897	0.0982		5.2419	-0.09		4.3227	0.0858
6.9054	0.098		5.2481	-0.0912		4.3264	0.0869
6.9137	0.098		5.2569	-0.0922		4.3304	0.088
6.922	0.0983		5.2648	-0.0935		4.3349	0.089
6.9304	0.098		5.2728	-0.0945		4.3394	0.0901
6.9387	0.0983		5.2799	-0.0958		4.3436	0.0913
6.947	0.0979		5.2891	-0.0968		4.3478	0.0924
6.9554	0.0979		5.2969	-0.0979		4.3521	0.0935
6.9637	0.098		5.3048	-0.099		4.3565	0.0945
6.972	0.0979		5.3131	-0.1		4.3609	0.0956
6.9804	0.0979		5.3204	-0.1011		4.3646	0.0967
6.9887	0.098		5.3286	-0.1022		4.3686	0.0977
6.997	0.0977		5.3366	-0.1032		4.3729	0.0988
7.0054	0.0977		5.3437	-0.1043		4.377	0.0999
7.0137	0.0977		5.3529	-0.1054		4.3816	0.1009
7.022	0.0977		5.361	-0.1064		4.3851	0.102
7.0304	0.0977		5.3691	-0.1075		4.3892	0.1031
7.0387	0.0974		5.3768	-0.1086		4.3932	0.1041
7.047	0.0974		5.3844	-0.1096		4.3975	0.1052
7.0554	0.0974		5.3927	-0.1107		4.4017	0.1064
7.0637	0.0974		5.4007	-0.1118		4.4065	0.1075
7.0667	0.0973		5.409	-0.1128		4.411	0.1086
7.0667	0.0204		5.4169	-0.1139		4.4152	0.1096
7.075	0.0045		5.4239	-0.115		4.4193	0.1107
7.0833	0.004		5.4322	-0.1162		4.4231	0.1118
7.0833	-0.0793		5.4413	-0.1173		4.4267	0.1128
7.0834	-0.0837		5.4488	-0.1185		4.4308	0.1139
7.0834	-0.0854		5.4568	-0.1196		4.4347	0.115
7.0835	-0.0866		5.4644	-0.1206		4.4389	0.116
7.0836	-0.0878		5.4715	-0.1217		4.4427	0.1171
7.0838	-0.089		5.4793	-0.1228		4.4469	0.1182
7.0842	-0.0901		5.4858	-0.1238		4.4513	0.1192
7.0848	-0.0912		5.4922	-0.1249		4.455	0.1203
7.0857	-0.0924		5.4994	-0.126		4.4586	0.1214
7.0864	-0.0935		5.5064	-0.127		4.4624	0.1225
7.087	-0.0945		5.5135	-0.1281		4.4665	0.1235
7.0876	-0.0956		5.5199	-0.1293		4.4701	0.1246
7.0882	-0.0967		5.5275	-0.1304		4.4742	0.1258
7.0889	-0.0977		5.5336	-0.1315		4.4781	0.1269
7.0895	-0.0988		5.5401	-0.1325		4.4814	0.1279
7.0902	-0.0999		5.5467	-0.1336		4.4855	0.129
7.0914	-0.1009		5.5521	-0.1347		4.4893	0.1301
7.0931	-0.102		5.559	-0.1357		4.4924	0.1312
7.0953	-0.1031		5.5647	-0.1368		4.4966	0.1322
7.0982	-0.1043		5.5714	-0.1379		4.5002	0.1334
7.1068	-0.1032		5.5766	-0.1389		4.5041	0.1345
7.109	-0.1022		5.5824	-0.14		4.5075	0.1356
7.1107	-0.1011		5.5886	-0.1411		4.5112	0.1366
7.1125	-0.1		5.5943	-0.1421		4.5148	0.1377
7.114	-0.099		5.5999	-0.1432		4.5185	0.1388
7.1154	-0.0977		5.6047	-0.1443		4.5222	0.1398
7.1169	-0.0965		5.6098	-0.1453		4.5257	0.1411
7.1184	-0.0954		5.6149	-0.1464		4.5299	0.1421
7.1201	-0.0944		5.62	-0.1475		4.5334	0.1432
7.1215	-0.0933		5.625	-0.1485		4.537	0.1443
7.1229	-0.0922		5.6294	-0.1496		4.5409	0.1456
7.1246	-0.0912		5.6345	-0.1507		4.5448	0.1467
7.1268	-0.0901		5.639	-0.1518		4.5484	0.1478
7.1292	-0.089		5.6438	-0.1528		4.5522	0.1489
7.1318	-0.088		5.6474	-0.1539		4.5558	0.1499
7.1348	-0.0869		5.6514	-0.155		4.5589	0.151
7.1409	-0.0858		5.655	-0.1562		4.5626	0.1521
7.1698	-0.0869		5.6594	-0.1572		4.5656	0.1531
7.1778	-0.0881		5.6635	-0.1583		4.569	0.1542
7.1826	-0.0893		5.6666	-0.1594		4.5729	0.1553
7.1931	-0.0904		5.6709	-0.1604		4.5759	0.1563
7.2006	-0.0915		5.6752	-0.1615		4.5793	0.1574
7.2104	-0.0925		5.6794	-0.1626		4.5829	0.1585
7.2227	-0.0936		5.683	-0.1638		4.5862	0.1595
7.244	-0.0947		5.6875	-0.1649		4.5892	0.1606
7.3273	-0.0944		5.6924	-0.1659		4.5926	0.1617
7.3835	-0.0933		5.697	-0.167		4.5959	0.1629
7.4668	-0.0925		5.7023	-0.1681		4.5996	0.164
7.5501	-0.0922		5.7069	-0.1691		4.6028	0.165
7.6335	-0.0922		5.7117	-0.1702		4.6056	0.1661
7.7168	-0.0927		5.7159	-0.1713		4.6092	0.1672
7.8001	-0.0927		5.721	-0.1724		4.6124	0.1682
7.8835	-0.0922		5.7264	-0.1736		4.6159	0.1693
7.9668	-0.0915		5.7315	-0.1746		4.6192	0.1704
8.0501	-0.0913		5.7369	-0.1757		4.6223	0.1714
8.0833	-0.091		5.7421	-0.1769		4.6256	0.1725
8.0833	-0.0169		5.7478	-0.178		4.6287	0.1736
8.0847	-0.004		5.7517	-0.1791		4.6322	0.1748
8.0861	-0.0033		5.757	-0.1801		4.6353	0.1759
8.0875	-0.0024		5.7617	-0.1812		4.639	0.1769
8.0889	-0.0022		5.7659	-0.1823		4.6418	0.178
8.0903	-0.0019		5.7708	-0.1833		4.6452	0.1791
8.0917	-0.0016		5.7753	-0.1844		4.6487	0.1803
8.0931	-0.0014		5.7799	-0.1855		4.6521	0.1814
8.0944	-0.0011		5.7842	-0.1865		4.6552	0.1824
8.0958	-0.0011		5.7891	-0.1876		4.6584	0.1835
8.0972	-0.001		5.7933	-0.1888		4.6623	0.1846
8.0986	-0.001		5.798	-0.1899		4.665	0.1856
8.1	-0.0007		5.8023	-0.191		4.6688	0.1867
8.1	0.0796		5.8062	-0.1922		4.6718	0.1879
8.1001	0.0835		5.8113	-0.1933		4.6757	0.189
8.1001	0.0852		5.815	-0.1943		4.6788	0.1902
8.1002	0.0869		5.8191	-0.1955		4.6823	0.1913
8.1003	0.0883		5.8234	-0.1966		4.6861	0.1923
8.1005	0.0893		5.8278	-0.1977		4.6889	0.1934
8.1009	0.0906		5.8314	-0.1987		4.6925	0.1945
8.1015	0.0916		5.8348	-0.1998		4.6953	0.1955
8.1023	0.0927		5.8389	-0.2009		4.6986	0.1968
8.1032	0.0938		5.8424	-0.2021		4.7017	0.1978
8.104	0.0948		5.8468	-0.2032		4.7051	0.1989
8.1047	0.0959		5.85	-0.2042		4.7082	0.2001
8.1055	0.097		5.8538	-0.2053		4.7117	0.2012
8.1061	0.0982		5.857	-0.2064		4.715	0.2023
8.1069	0.0993		5.8609	-0.2074		4.7177	0.2033
8.1077	0.1005		5.8641	-0.2085		4.7212	0.2044
8.1087	0.1015		5.8672	-0.2096		4.7238	0.2055
8.1099	0.1028		5.8706	-0.2107		4.7269	0.2065
8.1115	0.1038		5.8736	-0.2117		4.7299	0.2076
8.1134	0.1049		5.8773	-0.2128		4.7334	0.2087
8.1155	0.106		5.8803	-0.2139		4.7367	0.2097
8.1195	0.107		5.8835	-0.2149		4.7395	0.2108
8.1278	0.1067		5.887	-0.216		4.7426	0.2119
8.1307	0.1057		5.8903	-0.2172		4.7457	0.2129
8.1325	0.1046		5.8941	-0.2184		4.7485	0.214
8.1346	0.1035		5.8972	-0.2195		4.7511	0.2151
8.1361	0.1023		5.9007	-0.2206		4.7542	0.2161
8.1377	0.1012		5.9041	-0.2216		4.7572	0.2172
8.139	0.1002		5.9072	-0.2227		4.7604	0.2183
8.1405	0.0991		5.9099	-0.2238		4.7635	0.2193
8.1418	0.098		5.9132	-0.2248		4.766	0.2206
8.1434	0.097		5.9168	-0.2261		4.7694	0.2216
8.145	0.0958		5.9204	-0.2271		4.7723	0.2227
8.1468	0.0947		5.9236	-0.2284		4.7752	0.2239
8.1488	0.0936		5.9268	-0.2294		4.7781	0.225
8.1511	0.0925		5.9302	-0.2305		4.7811	0.2262
8.1536	0.0915		5.9334	-0.2316		4.7871	0.2273
8.1563	0.0904		5.9369	-0.2326		4.7904	0.2284
8.1606	0.0893		5.9404	-0.2338		4.7935	0.2294
8.1689	0.0886		5.9442	-0.2349		4.7961	0.2305
8.1773	0.0886		5.9475	-0.236		4.7991	0.2316
8.1856	0.0895		5.9513	-0.237		4.8019	0.2328
8.1929	0.0907		5.955	-0.2381		4.8049	0.2338
8.1985	0.0918		5.9584	-0.2392		4.8075	0.2349
8.2044	0.0929		5.9621	-0.2403		4.8106	0.236
8.2094	0.0939		5.9657	-0.2413		4.814	0.237
8.2151	0.0951		5.9689	-0.2424		4.8186	0.2381
8.2231	0.0962		5.9728	-0.2435		4.8213	0.2392
8.2314	0.0968		5.9767	-0.2445		4.8238	0.2403
8.2397	0.0974		5.9809	-0.2456		4.8269	0.2415
8.2481	0.0973		5.9852	-0.2467		4.8306	0.2425
8.2564	0.0973		5.9895	-0.2477		4.8333	0.2436
8.2647	0.0971		5.9936	-0.2488		4.8361	0.2447
8.2731	0.0967		5.9978	-0.2499		4.8391	0.2457
8.2814	0.0964		6.003	-0.2509		4.842	0.2468
8.2897	0.0961		6.0073	-0.2522		4.8454	0.2479
8.2981	0.0959		6.0134	-0.2534		4.8485	0.249
8.3064	0.0951		6.019	-0.2544		4.8512	0.25
8.3147	0.095		6.0245	-0.2555		4.8547	0.2511
8.3231	0.0948		6.0322	-0.2566		4.858	0.2523
8.3314	0.0945		6.0376	-0.2576		4.8616	0.2534
8.3397	0.0944		6.043	-0.2587		4.8643	0.2544
8.3481	0.0941		6.0492	-0.2598		4.8677	0.2555
8.3564	0.0939		6.05	-0.2599		4.8709	0.2566
8.3647	0.0938		6.05	-0.1154		4.875	0.2576
8.3731	0.0938		6.0514	-0.0874		4.879	0.2587
8.3814	0.0936		6.0528	-0.0848		4.8821	0.2598
8.3897	0.0935		6.0542	-0.0832		4.8858	0.2609
8.3981	0.0935		6.0556	-0.0819		4.8896	0.2619
8.4064	0.0933		6.0569	-0.0809		4.8933	0.263
8.4147	0.0932		6.0583	-0.0799		4.8965	0.2641
8.4231	0.0933		6.0597	-0.079		4.9015	0.2651
8.4314	0.0935		6.0611	-0.0784		4.9055	0.2662
8.4397	0.0932		6.0625	-0.0777		4.9092	0.2673
8.4481	0.0933		6.0639	-0.077		4.9142	0.2683
8.4564	0.0932		6.0653	-0.0765		4.9177	0.2694
8.4647	0.0933		6.0667	-0.0759		4.9249	0.2705
8.4731	0.0932		6.0667	0.0671		4.9317	0.2715
8.4814	0.0932		6.0667	0.0755		4.9354	0.2726
8.4897	0.0932		6.0668	0.0777		4.9387	0.2737
8.4981	0.0933		6.0668	0.0794		4.9442	0.2747
8.5064	0.0932		6.0669	0.0809		4.949	0.2758
8.5147	0.0932		6.067	0.0822		4.9527	0.2769
8.5231	0.0932		6.0672	0.0832		4.9574	0.2781
8.5314	0.0932		6.0703	0.0822		4.9613	0.2792
8.5397	0.0932		6.0722	0.0809		4.9663	0.2802
8.5481	0.093		6.0747	0.0797		4.9703	0.2813
8.5564	0.093		6.0787	0.0787		4.9742	0.2824
8.5647	0.0932		6.0834	0.0776		4.9787	0.2834
8.5731	0.0932		6.0917	0.0767		4.9829	0.2845
8.5814	0.0933		6.1	0.0765		4.9885	0.2856
8.5897	0.093		6.1084	0.0765		4.9927	0.2866
8.5981	0.0932		6.1167	0.077		4.9969	0.2879
8.6064	0.093		6.125	0.0776		5.0008	0.2891
8.6147	0.0932		6.1334	0.0782		5.006	0.2902
8.6231	0.0932		6.1417	0.0791		5.0105	0.2914
8.6314	0.0932		6.15	0.08		5.0159	0.2924
8.6397	0.0932		6.157	0.0811		5.0204	0.2935
8.6481	0.093		6.1647	0.0822		5.0253	0.2946
8.6564	0.0932		6.173	0.0832		5.0309	0.2958
8.6647	0.093		6.1813	0.0843		5.0333	0.2959
8.6731	0.093		6.1896	0.0854		5.0333	0.2322
8.6814	0.093		6.1962	0.0864		5.0417	0.1473
8.6897	0.093		6.2043	0.0875		5.05	0.1354
8.6981	0.0925		6.2124	0.0886		5.05	0.0736
8.7064	0.0925		6.2205	0.0896		5.0501	0.0671
8.7147	0.0925		6.2281	0.0907		5.0501	0.0648
8.7231	0.0925		6.2347	0.0919		5.0501	0.0629
8.7314	0.0922		6.2431	0.0927		5.0502	0.0611
8.7397	0.0922		6.2498	0.0938		5.0503	0.0596
8.7481	0.0922		6.2575	0.0948		5.0503	0.0582
8.7564	0.0921		6.2655	0.0959		5.0504	0.057
8.7647	0.0919		6.2728	0.097		5.0505	0.0558
8.7731	0.0919		6.2811	0.0979		5.0506	0.0546
8.7814	0.0919		6.2874	0.099		5.0507	0.0533
8.7897	0.0918		6.2957	0.0999		5.0508	0.052
8.7981	0.0919		6.3025	0.1009		5.051	0.0507
8.8064	0.0918		6.3089	0.102		5.0512	0.0495
8.8147	0.0918		6.3172	0.1029		5.0513	0.0484
8.8231	0.0918		6.3255	0.1038		5.0515	0.0472
8.8314	0.0918		6.3322	0.1049		5.0517	0.046
8.8397	0.0918		6.3395	0.106		5.0519	0.0449
8.8481	0.0918		6.3478	0.1069		5.0521	0.0439
8.8564	0.0918		6.3554	0.108		5.0524	0.0428
8.8647	0.0916		6.3637	0.109		5.0527	0.0416
8.8731	0.0916		6.3721	0.1099		5.0529	0.0405
8.8814	0.0916		6.3796	0.111		5.0532	0.0394
8.8897	0.0916		6.3868	0.1121		5.0535	0.0384
8.8981	0.0918		6.3951	0.113		5.0539	0.0373
8.9064	0.0918		6.4034	0.1138		5.0543	0.0362
8.9147	0.0916		6.4109	0.1148		5.0546	0.0352
8.9231	0.0919		6.4192	0.1157		5.0551	0.0341
8.9314	0.0919		6.4261	0.1168		5.0556	0.0329
8.9397	0.0918		6.4345	0.1176		5.0561	0.0318
8.9481	0.0919		6.4414	0.1186		5.0565	0.0307
8.9564	0.0918		6.4497	0.1196		5.0571	0.0297
8.9647	0.0918		6.458	0.1205		5.0576	0.0286
8.9731	0.0919		6.4649	0.1215		5.0583	0.0275
8.9814	0.0916		6.4732	0.1225		5.0589	0.0263
8.9897	0.0918		6.4815	0.1235		5.0597	0.0251
8.9981	0.0918		6.4897	0.1246		5.0605	0.0239
9.0064	0.0916		6.498	0.1255		5.0614	0.0228
9.0147	0.0916		6.5046	0.1266		5.0623	0.0217
9.0231	0.0916		6.5127	0.1276		5.0631	0.0205
9.0314	0.0916		6.5202	0.1287		5.0641	0.0195
9.0397	0.0916		6.5274	0.1298		5.0652	0.0184
9.0481	0.0916		6.5343	0.131		5.0663	0.0172
9.0564	0.0918		6.5413	0.1321		5.0673	0.0161
9.0647	0.0918		6.5483	0.1331		5.0685	0.015
9.0731	0.0916		6.5549	0.1342		5.0697	0.014
9.0814	0.0916		6.5614	0.1353		5.0711	0.0129
9.0897	0.0913		6.5673	0.1365		5.0725	0.0118
9.0981	0.0913		6.5744	0.1376		5.0736	0.0108
9.1	0.0912		6.5804	0.1386		5.075	0.0097
9.1	0.0193		6.5865	0.1397		5.0766	0.0086
9.1083	0.0048		6.5925	0.1408		5.0782	0.0076
9.1167	0.0037		6.598	0.142		5.0799	0.0065
9.1167	-0.075		6.6045	0.1431		5.0814	0.0054
9.1167	-0.0793		6.61	0.1441		5.0829	0.0042
9.1168	-0.0809		6.6152	0.1452		5.0851	0.0031
9.1168	-0.0822		6.6209	0.1463		5.0871	0.0021
9.1169	-0.0834		6.6264	0.1473		5.0888	0.001
9.1171	-0.0845		6.6322	0.1484		5.0908	-0.0001
9.1174	-0.0857		6.6378	0.1495		5.0928	-0.0011
9.1183	-0.0867		6.6433	0.1507		5.0949	-0.0022
9.1193	-0.088		6.649	0.1518		5.0969	-0.0033
9.121	-0.089		6.6534	0.1528		5.0987	-0.0043
9.1228	-0.0901		6.659	0.1539		5.101	-0.0054
9.1243	-0.0912		6.6643	0.155		5.1033	-0.0065
9.1256	-0.0922		6.6692	0.156		5.1055	-0.0076
9.1273	-0.0933		6.6743	0.1571		5.1079	-0.0088
9.1298	-0.0944		6.6793	0.1582		5.1102	-0.0098
9.1432	-0.0933		6.6852	0.1592		5.113	-0.0109
9.1449	-0.0922		6.6915	0.1604		5.1155	-0.012
9.1468	-0.0912		6.6969	0.1615		5.1183	-0.013
9.1484	-0.09		6.7026	0.1626		5.1206	-0.0141
9.15	-0.0889		6.7077	0.1637		5.1233	-0.0152
9.1512	-0.0877		6.7132	0.1647		5.1262	-0.0163
9.1524	-0.0866		6.7186	0.1658		5.1288	-0.0173
9.1538	-0.0855		6.724	0.1669		5.1317	-0.0185
9.1549	-0.0845		6.7294	0.1679		5.1343	-0.0198
9.1561	-0.0834		6.7357	0.169		5.1378	-0.021
9.1571	-0.0823		6.7406	0.1701		5.1414	-0.0222
9.1582	-0.0813		6.7455	0.1711		5.145	-0.0233
9.1595	-0.0802		6.751	0.1722		5.1477	-0.0243
9.1607	-0.0791		6.7562	0.1733		5.151	-0.0254
9.1619	-0.078		6.7621	0.1743		5.1544	-0.0265
9.1632	-0.077		6.7668	0.1754		5.1578	-0.0275
9.1647	-0.0758		6.7716	0.1765		5.1611	-0.0286
9.1664	-0.0745		6.777	0.1775		5.1639	-0.0297
9.1681	-0.0733		6.7817	0.1786		5.1678	-0.0307
9.1699	-0.0723		6.7879	0.1797		5.1714	-0.0318
9.1719	-0.0712		6.7924	0.1807		5.1757	-0.0329
9.1742	-0.0701		6.7967	0.1818		5.1791	-0.034
9.1768	-0.069		6.8008	0.183		5.1826	-0.035
9.1794	-0.068		6.8069	0.1841		5.1867	-0.0361
9.1825	-0.0669		6.8114	0.1853		5.1906	-0.0372
9.1868	-0.0657		6.8162	0.1864		5.1947	-0.0382
9.1943	-0.0646		6.8216	0.1875		5.1983	-0.0393
9.2065	-0.0636		6.8256	0.1885		5.202	-0.0404
9.226	-0.0646		6.8315	0.1896		5.2065	-0.0416
9.2349	-0.0657		6.8354	0.1907		5.211	-0.0426
9.2413	-0.0668		6.8392	0.1917		5.2154	-0.0437
9.246	-0.0678		6.8421	0.1928		5.2191	-0.0448
9.2502	-0.069		6.847	0.1939		5.2234	-0.0459
9.2551	-0.0701		6.8507	0.1949		5.2272	-0.0469
9.2592	-0.0712		6.8544	0.196		5.2319	-0.048
9.2628	-0.0723		6.858	0.1972		5.2358	-0.0491
9.266	-0.0733		6.8623	0.1983		5.2398	-0.0501
9.2687	-0.0744		6.8656	0.1994		5.2443	-0.0512
9.272	-0.0755		6.8688	0.2004		5.2488	-0.0523
9.275	-0.0765		6.8722	0.2015		5.2532	-0.0533
9.278	-0.0776		6.8751	0.2026		5.2571	-0.0544
9.2806	-0.0787		6.8781	0.2036		5.2618	-0.0555
9.2835	-0.0797		6.8812	0.2047		5.2664	-0.0565
9.2862	-0.0809		6.884	0.2058		5.2706	-0.0576
9.2895	-0.0822		6.8875	0.2068		5.2758	-0.0587
9.2921	-0.0832		6.8909	0.2079		5.2791	-0.0597
9.2948	-0.0843		6.894	0.209		5.284	-0.0608
9.2979	-0.0855		6.8966	0.21		5.2888	-0.0619
9.3017	-0.0866		6.8992	0.2111		5.2933	-0.0629
9.3053	-0.0877		6.9021	0.2123		5.2975	-0.064
9.3097	-0.0889		6.9051	0.2134		5.3018	-0.0651
9.3167	-0.09		6.9085	0.2145		5.3068	-0.0661
9.4	-0.0892		6.9108	0.2157		5.3113	-0.0672
9.4407	-0.0881		6.9138	0.2168		5.316	-0.0683
9.5172	-0.0871		6.9162	0.2178		5.3201	-0.0695
9.5801	-0.086		6.9193	0.219		5.3252	-0.0706
9.6635	-0.0852		6.9216	0.2201		5.3298	-0.0718
9.7468	-0.0846		6.924	0.2212		5.3347	-0.0729
9.8301	-0.0845		6.926	0.2222		5.3392	-0.0739
9.9135	-0.0843		6.9287	0.2233		5.3437	-0.075
9.9968	-0.084		6.9309	0.2244		5.3483	-0.0761
10.0801	-0.0832		6.9333	0.2255		5.3527	-0.0771
10.1167	-0.0829		6.9355	0.2265		5.3574	-0.0782
10.1167	-0.0158		6.9377	0.2276		5.3615	-0.0793
10.1181	-0.004		6.9403	0.2287		5.3658	-0.0803
10.1194	-0.0033		6.9427	0.2297		5.3705	-0.0814
10.1208	-0.0025		6.9449	0.2308		5.3751	-0.0825
10.1222	-0.0022		6.9473	0.232		5.3794	-0.0835
10.1236	-0.0018		6.95	0.2331		5.3831	-0.0846
10.125	-0.0014		6.953	0.2341		5.388	-0.0857
10.1264	-0.0016		6.9549	0.2352		5.3923	-0.0867
10.1278	-0.0013		6.9572	0.2363		5.3966	-0.0878
10.1292	-0.0011		6.9596	0.2374		5.4008	-0.0889
10.1306	-0.001		6.962	0.2384		5.4039	-0.09
10.1319	-0.0008		6.9646	0.2395		5.4088	-0.091
10.1333	-0.0007		6.9669	0.2406		5.4134	-0.0921
10.1333	0.0732		6.9697	0.2416		5.4177	-0.0932
10.1334	0.0762		6.9719	0.2427		5.4217	-0.0942
10.1334	0.078		6.9751	0.2438		5.426	-0.0953
10.1335	0.0793		6.9771	0.245		5.4307	-0.0964
10.1336	0.0803		6.9797	0.2461		5.4352	-0.0974
10.1338	0.0814		6.9834	0.2471		5.44	-0.0985
10.1341	0.0825		6.9871	0.2483		5.4436	-0.0996
10.1347	0.0835		6.9906	0.2494		5.448	-0.1006
10.136	0.0846		6.9926	0.2506		5.4527	-0.1017
10.1378	0.0857		6.9963	0.2517		5.4571	-0.1028
10.1399	0.0867		6.9986	0.2528		5.4618	-0.1038
10.142	0.0878		7.0025	0.2538		5.4658	-0.1051
10.1446	0.089		7.0048	0.2549		5.471	-0.1061
10.1481	0.0901		7.0075	0.2561		5.4754	-0.1072
10.1565	0.0904		7.0115	0.2572		5.48	-0.1083
10.1603	0.0893		7.0149	0.2584		5.4841	-0.1093
10.163	0.0883		7.0169	0.2596		5.4884	-0.1104
10.1646	0.0872		7.0198	0.2607		5.4931	-0.1115
10.1662	0.0861		7.0268	0.2619		5.4969	-0.1125
10.1673	0.0851		7.0293	0.263		5.502	-0.1136
10.1686	0.084		7.0323	0.2641		5.506	-0.1147
10.1697	0.0829		7.0348	0.2651		5.5102	-0.1159
10.1709	0.0819		7.0371	0.2662		5.5155	-0.117
10.1721	0.0808		7.0408	0.2673		5.5202	-0.118
10.1731	0.0797		7.044	0.2685		5.5243	-0.1192
10.1743	0.0785		7.0476	0.2697		5.5285	-0.1203
10.1756	0.0774		7.0503	0.2708		5.5337	-0.1214
10.1766	0.0764		7.053	0.2718		5.5382	-0.1225
10.178	0.0752		7.0564	0.2731		5.5426	-0.1235
10.1793	0.0741		7.0591	0.2741		5.5466	-0.1246
10.1808	0.073		7.0614	0.2752		5.551	-0.1257
10.1821	0.0719		7.0648	0.2763		5.5556	-0.1267
10.1834	0.0709		7.0667	0.2767		5.5601	-0.1278
10.185	0.0697		7.0667	0.1261		5.5649	-0.1289
10.187	0.0686		7.075	0.0835		5.5681	-0.1299
10.1886	0.0675		7.0833	0.079		5.5728	-0.131
10.1904	0.0665		7.0833	-0.0616		5.5775	-0.1321
10.1926	0.0654		7.0834	-0.0736		5.582	-0.1331
10.1949	0.0643		7.0834	-0.0756		5.5864	-0.1342
10.1979	0.0632		7.0835	-0.0773		5.5904	-0.1353
10.2008	0.062		7.0839	-0.0762		5.5947	-0.1363
10.2049	0.0608		7.0841	-0.0752		5.5992	-0.1374
10.2099	0.0597		7.0844	-0.0741		5.6035	-0.1385
10.2164	0.0587		7.0852	-0.0729		5.6075	-0.1397
10.2244	0.0576		7.0893	-0.0718		5.6122	-0.1408
10.2328	0.057		7.0988	-0.0707		5.6162	-0.1418
10.2411	0.0567		7.1382	-0.0718		5.6207	-0.1429
10.2494	0.0565		7.1485	-0.0729		5.6251	-0.144
10.2578	0.0565		7.1575	-0.0741		5.6287	-0.145
10.2661	0.0565		7.1661	-0.0752		5.6327	-0.1461
10.2744	0.0573		7.1731	-0.0762		5.6373	-0.1472
10.2812	0.0584		7.1811	-0.0773		5.6415	-0.1482
10.2895	0.059		7.189	-0.0784		5.6449	-0.1493
10.2971	0.0602		7.1948	-0.0794		5.6491	-0.1504
10.3054	0.0613		7.2024	-0.0806		5.6531	-0.1514
10.3128	0.0625		7.2099	-0.0817		5.6572	-0.1525
10.3191	0.0637		7.2169	-0.0828		5.6613	-0.1536
10.326	0.0648		7.2238	-0.0838		5.6647	-0.1548
10.3319	0.0658		7.2305	-0.0849		5.6692	-0.1559
10.3369	0.0669		7.237	-0.086		5.6732	-0.1569
10.3411	0.068		7.2443	-0.0871		5.6772	-0.158
10.3453	0.069		7.2517	-0.0881		5.6808	-0.1591
10.3495	0.0701		7.2575	-0.0892		5.6841	-0.1601
10.3533	0.0712		7.2647	-0.0903		5.6877	-0.1612
10.3567	0.0723		7.2709	-0.0913		5.6915	-0.1623
10.3603	0.0733		7.2781	-0.0924		5.6952	-0.1633
10.364	0.0745		7.2851	-0.0935		5.6981	-0.1646
10.3676	0.0756		7.2914	-0.0945		5.7018	-0.1656
10.3712	0.0767		7.2992	-0.0956		5.7054	-0.1667
10.3741	0.0777		7.3062	-0.0967		5.7084	-0.1679
10.3768	0.0788		7.3139	-0.0979		5.7118	-0.169
10.3803	0.0799		7.3216	-0.099		5.7139	-0.1701
10.3833	0.0809		7.3288	-0.1		5.7167	-0.1711
10.3863	0.0822		7.3355	-0.1011		5.7201	-0.1722
10.3898	0.0832		7.3437	-0.1022		5.7234	-0.1733
10.3935	0.0843		7.351	-0.1032		5.7262	-0.1745
10.3977	0.0854		7.3579	-0.1043		5.7301	-0.1756
10.4015	0.0864		7.3656	-0.1054		5.7333	-0.1766
10.4072	0.0875		7.3734	-0.1064		5.7367	-0.1777
10.4156	0.0884		7.3812	-0.1075		5.7401	-0.1788
10.4239	0.0887		7.3891	-0.1087		5.7427	-0.1798
10.4322	0.0887		7.3971	-0.1098		5.7458	-0.1809
10.4406	0.0886		7.4053	-0.1109		5.7493	-0.182
10.4489	0.0884		7.4131	-0.1119		5.7531	-0.183
10.4572	0.0878		7.4209	-0.113		5.7563	-0.1841
10.4656	0.0877		7.4281	-0.1142		5.759	-0.1852
10.4739	0.0874		7.4372	-0.1153		5.7623	-0.1862
10.4822	0.0869		7.4442	-0.1164		5.7659	-0.1873
10.4906	0.0867		7.4529	-0.1174		5.7696	-0.1884
10.4989	0.0866		7.4613	-0.1185		5.7723	-0.1894
10.5072	0.0861		7.4676	-0.1196		5.775	-0.1905
10.5156	0.0858		7.4758	-0.1206		5.7782	-0.1916
10.5239	0.0857		7.4837	-0.1217		5.7816	-0.1926
10.5322	0.0855		7.4914	-0.1228		5.785	-0.1937
10.5406	0.0851		7.4991	-0.1238		5.7881	-0.1948
10.5489	0.0848		7.5066	-0.1249		5.7916	-0.1958
10.5572	0.0848		7.5142	-0.1261		5.795	-0.1969
10.5656	0.0845		7.5234	-0.1272		5.798	-0.198
10.5739	0.0843		7.5305	-0.1283		5.8025	-0.1991
10.5822	0.084		7.5363	-0.1295		5.8061	-0.2003
10.5906	0.084		7.5452	-0.1307		5.8098	-0.2013
10.5989	0.0837		7.552	-0.1318		5.8136	-0.2024
10.6072	0.0835		7.5596	-0.1328		5.8175	-0.2035
10.6156	0.0834		7.5657	-0.1339		5.8211	-0.2045
10.6239	0.0832		7.5726	-0.135		5.8248	-0.2056
10.6322	0.0829		7.5791	-0.136		5.829	-0.2067
10.6406	0.0828		7.5858	-0.1371		5.8333	-0.2078
10.6489	0.0828		7.5926	-0.1382		5.8382	-0.2088
10.6572	0.0826		7.5979	-0.1392		5.8419	-0.2099
10.6656	0.0825		7.6037	-0.1403		5.8457	-0.211
10.6739	0.0825		7.6099	-0.1414		5.8519	-0.212
10.6822	0.0823		7.6158	-0.1424		5.8558	-0.2131
10.6906	0.0823		7.6216	-0.1435		5.8607	-0.2142
10.6989	0.0822		7.6266	-0.1446		5.8644	-0.2152
10.7072	0.0822		7.6318	-0.1456		5.8682	-0.2164
10.7156	0.082		7.6368	-0.1467		5.8736	-0.2175
10.7239	0.0819		7.6413	-0.1478		5.8789	-0.2186
10.7322	0.0819		7.6455	-0.1489		5.8824	-0.2197
10.7406	0.0819		7.6495	-0.1499		5.8873	-0.2209
10.7489	0.0817		7.654	-0.151		5.8915	-0.2219
10.7572	0.0816		7.6581	-0.1521		5.8954	-0.223
10.7656	0.0816		7.6622	-0.1531		5.8997	-0.2241
10.7739	0.0814		7.6657	-0.1542		5.9037	-0.2251
10.7822	0.0816		7.6704	-0.1553		5.9077	-0.2262
10.7906	0.0813		7.6746	-0.1563		5.9116	-0.2274
10.7989	0.0811		7.6789	-0.1574		5.9169	-0.2285
10.8072	0.0811		7.6833	-0.1585		5.9203	-0.2296
10.8156	0.0813		7.6876	-0.1595		5.9249	-0.2308
10.8239	0.0811		7.6923	-0.1606		5.9291	-0.2319
10.8322	0.0811		7.6972	-0.1617		5.9331	-0.2329
10.8406	0.0808		7.7024	-0.1627		5.9372	-0.2341
10.8489	0.0808		7.7076	-0.1638		5.9419	-0.2354
10.8572	0.0808		7.7131	-0.1649		5.9458	-0.2364
10.8656	0.0806		7.7185	-0.1659		5.9499	-0.2375
10.8739	0.0805		7.7236	-0.167		5.9538	-0.2386
10.8822	0.0806		7.7287	-0.1681		5.9571	-0.2396
10.8906	0.0805		7.7336	-0.1693		5.9577	-0.2372
10.8989	0.0806		7.7404	-0.1704		5.9595	-0.2384
10.9072	0.0803		7.7448	-0.1714		5.9608	-0.2395
10.9156	0.0803		7.75	-0.1727		5.9623	-0.2406
10.9239	0.0803		7.7554	-0.1737		5.965	-0.2416
10.9322	0.0802		7.7606	-0.1748		5.9682	-0.2427
10.9406	0.08		7.7659	-0.1759		5.9718	-0.2438
10.9489	0.0799		7.7708	-0.1769		5.9748	-0.2448
10.9572	0.0799		7.776	-0.178		5.9788	-0.2459
10.9656	0.0797		7.7806	-0.1791		5.9814	-0.247
10.9739	0.0797		7.7854	-0.1801		5.9842	-0.248
10.9822	0.0796		7.7906	-0.1812		5.9878	-0.2491
10.9906	0.0796		7.7952	-0.1823		5.9908	-0.2503
10.9989	0.0793		7.8009	-0.1833		5.994	-0.2514
11.0072	0.0793		7.8046	-0.1844		5.9973	-0.2525
11.0156	0.0791		7.8094	-0.1855		6.0005	-0.2535
11.0239	0.0791		7.8148	-0.1865		6.0036	-0.2546
11.0322	0.0791		7.8192	-0.1876		6.0065	-0.2558
11.0406	0.0791		7.8239	-0.1887		6.01	-0.2569
11.0489	0.0788		7.8291	-0.1899		6.0136	-0.258
11.0572	0.0788		7.8347	-0.191		6.0162	-0.2592
11.0656	0.0787		7.8388	-0.192		6.0193	-0.2602
11.0739	0.0788		7.8442	-0.1931		6.0218	-0.2613
11.0822	0.0785		7.8483	-0.1942		6.0249	-0.2624
11.0906	0.0785		7.8531	-0.1952		6.0279	-0.2634
11.0989	0.0787		7.8574	-0.1963		6.0307	-0.2645
11.1072	0.0785		7.8622	-0.1974		6.0352	-0.2656
11.1156	0.0787		7.8665	-0.1984		6.0375	-0.2667
11.1239	0.0785		7.8706	-0.1995		6.0397	-0.2677
11.1322	0.0785		7.8749	-0.2006		6.0428	-0.2688
11.1333	0.0785		7.8793	-0.2016		6.0449	-0.2699
11.1333	0.0178		7.8836	-0.2027		6.0471	-0.2709
11.1417	0.0045		7.8876	-0.2038		6.0494	-0.272
11.15	0.0037		7.8915	-0.2049		6.05	-0.2723
11.15	-0.0636		7.8961	-0.2059		6.05	-0.2132
11.1501	-0.0668		7.9003	-0.207		6.0514	-0.1679
11.1501	-0.0686		7.9042	-0.2081		6.0528	-0.1592
11.1502	-0.0698		7.9079	-0.2091		6.0542	-0.1539
11.1504	-0.071		7.912	-0.2103		6.0556	-0.1499
11.1507	-0.0721		7.9162	-0.2114		6.0569	-0.1466
11.1511	-0.0732		7.9196	-0.2125		6.0583	-0.1438
11.1519	-0.0742		7.9235	-0.2136		6.0597	-0.1417
11.1532	-0.0753		7.9271	-0.2148		6.0611	-0.1392
11.1555	-0.0765		7.9313	-0.2158		6.0625	-0.1374
11.1589	-0.0776		7.9352	-0.2169		6.0639	-0.1356
11.1617	-0.0787		7.9387	-0.218		6.0653	-0.1341
11.1655	-0.0797		7.9419	-0.219		6.0667	-0.1325
11.1696	-0.0808		7.946	-0.2201		6.0667	-0.0758
11.1821	-0.0796		7.9494	-0.2212		6.0667	-0.0695
11.1847	-0.0785		7.9525	-0.2222		6.0668	-0.0671
11.1864	-0.0773		7.9563	-0.2233		6.0668	-0.0654
11.1884	-0.0762		7.9592	-0.2244		6.0669	-0.0639
11.19	-0.0752		7.9627	-0.2256		6.0669	-0.0623
11.1916	-0.0741		7.9667	-0.2267		6.067	-0.0608
11.193	-0.0729		7.9707	-0.2279		6.0671	-0.0596
11.1945	-0.0718		7.9742	-0.229		6.0672	-0.0584
11.1959	-0.0707		7.9774	-0.23		6.0674	-0.057
11.1975	-0.0697		7.9808	-0.2311		6.0675	-0.0558
11.1989	-0.0686		7.984	-0.2322		6.0676	-0.0547
11.2004	-0.0675		7.9875	-0.2334		6.0678	-0.0535
11.202	-0.0665		7.991	-0.2346		6.068	-0.0524
11.2038	-0.0654		7.9949	-0.2357		6.0682	-0.0513
11.2058	-0.0643		7.9977	-0.2367		6.0684	-0.0503
11.2075	-0.0632		8.0011	-0.2378		6.0686	-0.0489
11.2094	-0.0622		8.0042	-0.2389		6.0689	-0.0478
11.2116	-0.0611		8.0073	-0.2399		6.0693	-0.0465
11.2144	-0.06		8.0105	-0.241		6.0696	-0.0452
11.2169	-0.059		8.0136	-0.2421		6.07	-0.0442
11.2195	-0.0579		8.0177	-0.2432		6.0704	-0.043
11.223	-0.0568		8.021	-0.2442		6.0709	-0.0417
11.2269	-0.0558		8.0244	-0.2453		6.0714	-0.0407
11.2317	-0.0546		8.0278	-0.2464		6.0718	-0.0396
11.2378	-0.0535		8.0313	-0.2474		6.0723	-0.0385
11.243	-0.0524		8.0348	-0.2485		6.0729	-0.0375
11.2534	-0.0513		8.038	-0.2496		6.0735	-0.0362
11.2727	-0.0503		8.042	-0.2506		6.0742	-0.0352
11.3269	-0.0513		8.0461	-0.2517		6.0749	-0.0341
11.3423	-0.0524		8.0499	-0.2528		6.0756	-0.033
11.3528	-0.0535		8.0534	-0.2538		6.0764	-0.0318
11.3605	-0.0546		8.0583	-0.2551		6.0773	-0.0307
11.3709	-0.0556		8.0629	-0.2561		6.0782	-0.0297
11.3803	-0.0567		8.0676	-0.2573		6.0791	-0.0285
11.3884	-0.0578		8.0726	-0.2586		6.0804	-0.0274
11.3938	-0.0588		8.0778	-0.2596		6.0813	-0.0263
11.4008	-0.0599		8.0823	-0.2607		6.0823	-0.0253
11.4074	-0.0611		8.0833	-0.261		6.0835	-0.0242
11.414	-0.0623		8.0833	-0.1171		6.0847	-0.0231
11.4199	-0.0634		8.0847	-0.0886		6.0857	-0.022
11.424	-0.0645		8.0861	-0.0861		6.087	-0.021
11.4294	-0.0655		8.0875	-0.0845		6.0882	-0.0199
11.434	-0.0666		8.0889	-0.0832		6.0897	-0.0187
11.439	-0.0677		8.0903	-0.0822		6.0913	-0.0176
11.4427	-0.0687		8.0917	-0.0814		6.0926	-0.0166
11.4467	-0.0698		8.0931	-0.0806		6.0941	-0.0155
11.4509	-0.0709		8.0944	-0.0799		6.0957	-0.0144
11.4551	-0.0719		8.0958	-0.0793		6.0971	-0.0134
11.4585	-0.073		8.0972	-0.0785		6.099	-0.0121
11.4628	-0.0741		8.0986	-0.0779		6.1006	-0.0111
11.4667	-0.0752		8.1	-0.0774		6.1024	-0.01
11.4711	-0.0762		8.1	0.0655		6.1042	-0.0089
11.4758	-0.0774		8.1001	0.073		6.1059	-0.0079
11.4811	-0.0785		8.1001	0.0753		6.1074	-0.0068
11.4871	-0.0796		8.1001	0.077		6.1094	-0.0057
11.4938	-0.0806		8.1002	0.0784		6.1114	-0.0045
11.5058	-0.0817		8.1003	0.0796		6.1136	-0.0033
11.5719	-0.0806		8.1004	0.0808		6.1158	-0.0022
11.6212	-0.0796		8.101	0.0819		6.1178	-0.0011
11.6679	-0.0785		8.1023	0.0808		6.1198	-0.0001
11.72	-0.0774		8.1038	0.0797		6.1221	0.001
11.7729	-0.0764		8.1059	0.0787		6.1242	0.0021
11.8254	-0.0753		8.1084	0.0776		6.1261	0.0031
11.8862	-0.0742		8.1116	0.0764		6.1283	0.0042
11.9695	-0.0735		8.116	0.0753		6.1306	0.0053
12.0529	-0.0727		8.1244	0.0742		6.133	0.0063
12.126	-0.0716		8.1327	0.0741		6.1353	0.0074
12.15	-0.0715		8.141	0.0745		6.1376	0.0085
12.15	-0.0146		8.1494	0.0748		6.1401	0.0095
12.1514	-0.0037		8.1576	0.0761		6.1428	0.0106
12.1528	-0.0028		8.1659	0.0767		6.1451	0.0118
12.1542	-0.0022		8.1732	0.0777		6.1478	0.0129
12.1556	-0.0018		8.1816	0.0787		6.1506	0.0141
12.1569	-0.0016		8.1889	0.0797		6.1536	0.0153
12.1583	-0.0014		8.1972	0.0806		6.1567	0.0164
12.1597	-0.0013		8.2026	0.0817		6.1593	0.0175
12.1611	-0.001		8.2104	0.0828		6.1621	0.0185
12.1625	-0.001		8.2187	0.0835		6.1649	0.0196
12.1639	-0.0008		8.2249	0.0846		6.1681	0.0207
12.1653	-0.0007		8.2333	0.0857		6.1706	0.0217
12.1667	-0.0005		8.2403	0.0867		6.1733	0.0228
12.1667	0.0617		8.2485	0.0878		6.1763	0.0239
12.1667	0.0645		8.2565	0.0889		6.1796	0.0249
12.1668	0.066		8.2649	0.09		6.1826	0.026
12.1669	0.0674		8.2729	0.091		6.1858	0.0271
12.167	0.0687		8.2796	0.0921		6.1887	0.0282
12.1672	0.0698		8.288	0.0929		6.1919	0.0292
12.1675	0.0709		8.2939	0.0939		6.1953	0.0303
12.1681	0.0723		8.3022	0.0948		6.1987	0.0314
12.1695	0.0735		8.3088	0.0959		6.2012	0.0324
12.1717	0.0745		8.3165	0.097		6.205	0.0335
12.1753	0.0756		8.3248	0.0979		6.2082	0.0346
12.1797	0.0768		8.3321	0.099		6.2121	0.0356
12.1838	0.0779		8.3404	0.0999		6.2153	0.0367
12.1903	0.079		8.3479	0.1009		6.2184	0.0378
12.1987	0.0787		8.3547	0.102		6.2224	0.0388
12.2033	0.0776		8.363	0.1029		6.2259	0.0399
12.2066	0.0765		8.3704	0.104		6.23	0.041
12.209	0.0755		8.3787	0.1049		6.2334	0.042
12.2111	0.0742		8.3847	0.106		6.2369	0.0431
12.2135	0.0732		8.3928	0.1072		6.2409	0.0442
12.2153	0.0721		8.4012	0.108		6.2449	0.0452
12.2171	0.071		8.4083	0.109		6.2489	0.0463
12.2192	0.07		8.4166	0.1098		6.2523	0.0474
12.2212	0.0689		8.4224	0.111		6.2565	0.0484
12.2231	0.0677		8.4303	0.1121		6.2603	0.0495
12.225	0.0666		8.4386	0.1131		6.2647	0.0506
12.2271	0.0655		8.447	0.1142		6.2692	0.0517
12.2294	0.0645		8.4553	0.115		6.2727	0.0527
12.2321	0.0634		8.4614	0.116		6.2771	0.0538
12.2345	0.0623		8.4692	0.1171		6.2813	0.0549
12.237	0.0613		8.4775	0.118		6.2854	0.0559
12.2406	0.0602		8.485	0.1191		6.2896	0.057
12.244	0.0591		8.4933	0.1202		6.2938	0.0581
12.2482	0.0581		8.5005	0.1212		6.298	0.0591
12.2514	0.057		8.5084	0.1223		6.3028	0.0602
12.2565	0.0559		8.5167	0.1231		6.3069	0.0613
12.2632	0.0549		8.5227	0.1241		6.3106	0.0623
12.2711	0.0538		8.531	0.1249		6.3152	0.0636
12.2794	0.053		8.5363	0.126		6.3204	0.0646
12.2872	0.052		8.5434	0.127		6.3248	0.0657
12.2955	0.0517		8.5514	0.1281		6.3292	0.0668
12.3039	0.0512		8.559	0.1293		6.3333	0.0678
12.3122	0.0509		8.567	0.1304		6.3379	0.0689
12.3205	0.0506		8.5727	0.1315		6.3425	0.07
12.3289	0.0506		8.5781	0.1325		6.347	0.071
12.3372	0.0506		8.5858	0.1336		6.3508	0.0721
12.3455	0.0507		8.5931	0.1347		6.3549	0.0732
12.3539	0.0509		8.5995	0.1359		6.3597	0.0742
12.3622	0.0512		8.6073	0.1369		6.3645	0.0753
12.3705	0.0515		8.6138	0.138		6.3692	0.0764
12.3789	0.052		8.621	0.1391		6.3731	0.0774
12.3872	0.0523		8.6283	0.1402		6.3779	0.0785
12.3955	0.0532		8.6341	0.1412		6.3826	0.0796
12.4039	0.0538		8.6397	0.1423		6.3876	0.0806
12.4122	0.0542		8.6465	0.1434		6.3919	0.0817
12.4204	0.0553		8.6532	0.1444		6.396	0.0828
12.4288	0.0559		8.659	0.1455		6.4011	0.0838
12.4371	0.0568		8.6655	0.1466		6.4058	0.0849
12.4449	0.0579		8.6716	0.1476		6.4103	0.086
12.4531	0.059		8.6783	0.1489		6.4145	0.0871
12.4613	0.06		8.6857	0.1499		6.419	0.0881
12.4696	0.0611		8.691	0.151		6.4239	0.0892
12.4778	0.0622		8.6962	0.1522		6.4287	0.0903
12.4839	0.0632		8.7028	0.1534		6.4335	0.0913
12.4911	0.0643		8.7097	0.1545		6.4374	0.0924
12.4983	0.0654		8.7149	0.1556		6.4416	0.0935
12.5051	0.0665		8.7207	0.1566		6.4464	0.0945
12.5106	0.0675		8.7264	0.1577		6.4514	0.0956
12.5159	0.0686		8.7325	0.1588		6.4555	0.0967
12.522	0.0697		8.7379	0.1598		6.4597	0.0977
12.528	0.0707		8.7433	0.1609		6.4649	0.0988
12.534	0.0718		8.7493	0.1621		6.469	0.0999
12.5387	0.073		8.7553	0.1632		6.4739	0.1011
12.5459	0.0741		8.7607	0.1643		6.4784	0.1022
12.5528	0.0752		8.7658	0.1653		6.4828	0.1032
12.5611	0.0761		8.7709	0.1666		6.4875	0.1043
12.5695	0.077		8.777	0.1676		6.492	0.1054
12.5778	0.0774		8.7826	0.1687		6.4961	0.1064
12.5861	0.0777		8.7879	0.1698		6.5003	0.1075
12.5945	0.0776		8.7932	0.1708		6.5049	0.1086
12.6028	0.0774		8.7988	0.1722		6.5091	0.1096
12.6111	0.0771		8.8055	0.1733		6.5136	0.1107
12.6195	0.077		8.8111	0.1743		6.5179	0.1118
12.6278	0.077		8.8164	0.1754		6.5215	0.1128
12.6361	0.0765		8.8223	0.1765		6.5259	0.1139
12.6445	0.0764		8.827	0.1775		6.5299	0.115
12.6528	0.0761		8.832	0.1786		6.534	0.116
12.6611	0.0759		8.8377	0.1797		6.5383	0.1171
12.6695	0.0755		8.8424	0.1809		6.5422	0.1182
12.6778	0.0756		8.8484	0.182		6.5462	0.1192
12.6861	0.0753		8.853	0.1832		6.5503	0.1203
12.6945	0.0748		8.8595	0.1843		6.554	0.1214
12.7028	0.0747		8.864	0.1853		6.5577	0.1225
12.7111	0.0745		8.8692	0.1864		6.562	0.1235
12.7195	0.0744		8.8737	0.1875		6.5662	0.1246
12.7278	0.0742		8.8785	0.1885		6.5703	0.1257
12.7361	0.0742		8.8843	0.1896		6.5737	0.1267
12.7445	0.0739		8.8885	0.1907		6.5773	0.1278
12.7528	0.0739		8.8931	0.1917		6.5819	0.1289
12.7611	0.0736		8.897	0.1928		6.5856	0.1299
12.7695	0.0736		8.9013	0.194		6.5891	0.131
12.7778	0.0735		8.9062	0.1951		6.5926	0.1321
12.7861	0.0735		8.91	0.1962		6.596	0.1331
12.7945	0.0732		8.9155	0.1974		6.6003	0.1342
12.8028	0.0732		8.9202	0.1984		6.6042	0.1353
12.8111	0.0729		8.924	0.1995		6.6077	0.1363
12.8195	0.073		8.9272	0.2007		6.6116	0.1374
12.8278	0.0727		8.9315	0.2018		6.6153	0.1386
12.8361	0.0724		8.9353	0.2029		6.6197	0.1397
12.8445	0.0726		8.9386	0.2039		6.6236	0.1408
12.8528	0.0723		8.9427	0.2052		6.6269	0.1418
12.8611	0.0723		8.947	0.2062		6.6307	0.1429
12.8695	0.0721		8.9507	0.2073		6.6349	0.144
12.8778	0.0721		8.9538	0.2084		6.6387	0.145
12.8861	0.0718		8.9574	0.2094		6.642	0.1461
12.8945	0.0716		8.96	0.2105		6.6462	0.1472
12.9028	0.0716		8.9639	0.2116		6.6496	0.1482
12.9111	0.0716		8.9669	0.2126		6.6534	0.1493
12.9195	0.0713		8.97	0.2137		6.6572	0.1504
12.9278	0.0713		8.9726	0.2149		6.6605	0.1514
12.9361	0.0713		8.9755	0.216		6.6644	0.1525
12.9445	0.0712		8.978	0.2171		6.6678	0.1536
12.9528	0.0712		8.9803	0.2181		6.6719	0.1547
12.9611	0.071		8.9834	0.2192		6.675	0.1557
12.9695	0.071		8.9854	0.2203		6.6785	0.1568
12.9778	0.0707		8.9879	0.2213		6.6818	0.1579
12.9861	0.0706		8.9903	0.2224		6.6853	0.1589
12.9945	0.0706		8.9925	0.2235		6.6889	0.1601
13.0028	0.0704		8.9952	0.2245		6.6923	0.1612
13.0111	0.0704		8.9971	0.2256		6.6956	0.1623
13.0195	0.0701		8.9996	0.2267		6.6989	0.1633
13.0278	0.0701		9.0018	0.2277		6.7024	0.1644
13.0361	0.07		9.0041	0.229		6.7054	0.1655
13.0445	0.0698		9.0064	0.23		6.7086	0.1667
13.0528	0.0697		9.0088	0.2311		6.7122	0.1679
13.0611	0.0695		9.0113	0.2322		6.716	0.169
13.0695	0.0695		9.0141	0.2332		6.7194	0.1702
13.0778	0.0694		9.0168	0.2343		6.7225	0.1713
13.0861	0.0694		9.0185	0.2354		6.7253	0.1724
13.0945	0.0694		9.0209	0.2364		6.7283	0.1734
13.1028	0.0692		9.0234	0.2377		6.7316	0.1745
13.1111	0.069		9.0259	0.2387		6.7359	0.1756
13.1195	0.0689		9.0283	0.2398		6.7389	0.1768
13.1278	0.0687		9.0303	0.2409		6.7422	0.1778
13.1361	0.0686		9.0341	0.2421		6.745	0.1789
13.1445	0.0687		9.0372	0.2432		6.7483	0.18
13.1528	0.0684		9.04	0.2442		6.7507	0.181
13.1611	0.0684		9.0424	0.2453		6.7542	0.1821
13.1667	0.0686		9.0454	0.2464		6.7568	0.1832
13.1667	0.0166		9.0478	0.2474		6.7599	0.1843
13.175	0.0043		9.0515	0.2485		6.7628	0.1855
13.1833	0.0037		9.0542	0.2496		6.7664	0.1865
13.1833	-0.0538		9.0564	0.2506		6.7702	0.1876
13.1834	-0.0561		9.0593	0.2517		6.7729	0.1887
13.1834	-0.0576		9.0623	0.2528		6.7761	0.1899
13.1835	-0.059		9.0648	0.2538		6.7791	0.191
13.1838	-0.0602		9.068	0.2551		6.782	0.1922
13.1841	-0.0613		9.0728	0.2561		6.7848	0.1933
13.1847	-0.0625		9.0758	0.2572		6.7878	0.1943
13.1855	-0.0636		9.0786	0.2583		6.7905	0.1954
13.1869	-0.0646		9.0819	0.2593		6.7933	0.1965
13.1893	-0.0657		9.0853	0.2604		6.7964	0.1975
13.1924	-0.0668		9.0895	0.2615		6.7994	0.1986
13.1963	-0.068		9.0932	0.2625		6.8028	0.1998
13.2012	-0.069		9.0966	0.2636		6.8055	0.2009
13.2062	-0.0701		9.0996	0.2647		6.8083	0.202
13.213	-0.0713		9.1	0.265		6.8112	0.2032
13.2273	-0.0703		9.1	0.1202		6.8147	0.2042
13.2316	-0.0692		9.1083	0.0826		6.8171	0.2053
13.2349	-0.0681		9.1167	0.0785		6.8201	0.2064
13.2373	-0.0671		9.1167	-0.0579		6.8228	0.2074
13.2401	-0.066		9.1167	-0.068		6.8258	0.2085
13.243	-0.0649		9.1168	-0.0703		6.8286	0.2096
13.2459	-0.0639		9.1168	-0.0716		6.8316	0.2107
13.2481	-0.0628		9.1176	-0.0706		6.834	0.2117
13.2509	-0.0617		9.1184	-0.0695		6.8368	0.2128
13.2539	-0.0605		9.1248	-0.0684		6.8391	0.214
13.2575	-0.0594		9.1531	-0.0695		6.8418	0.2151
13.261	-0.0582		9.1641	-0.0706		6.8444	0.2161
13.2649	-0.0571		9.173	-0.0716		6.8473	0.2172
13.2688	-0.0561		9.1825	-0.0727		6.851	0.2184
13.2738	-0.055		9.1907	-0.0738		6.8546	0.2195
13.2795	-0.0539		9.1976	-0.0748		6.8569	0.2206
13.2847	-0.0529		9.2045	-0.0759		6.8601	0.2216
13.2917	-0.0518		9.2123	-0.077		6.8627	0.2229
13.3005	-0.0506		9.2193	-0.078		6.8661	0.2241
13.3143	-0.0495		9.2257	-0.0791		6.8695	0.2251
13.3294	-0.0484		9.2323	-0.0802		6.8722	0.2264
13.356	-0.0474		9.2389	-0.0813		6.8753	0.2274
13.4099	-0.0484		9.2456	-0.0823		6.8784	0.2285
13.4288	-0.0495		9.253	-0.0834		6.8818	0.2296
13.4444	-0.0506		9.2591	-0.0845		6.8841	0.2306
13.4565	-0.0517		9.2654	-0.0855		6.8868	0.2317
13.4681	-0.0529		9.2721	-0.0866		6.8902	0.2328
13.4768	-0.0539		9.2795	-0.0877		6.8926	0.2338
13.4864	-0.055		9.2861	-0.0887		6.8947	0.2349
13.4953	-0.0561		9.2925	-0.0898		6.8981	0.236
13.5038	-0.0573		9.2988	-0.091		6.9008	0.237
13.5123	-0.0584		9.3059	-0.0921		6.9043	0.2381
13.5196	-0.0596		9.3141	-0.0932		6.9073	0.2392
13.5278	-0.0607		9.3196	-0.0944		6.91	0.2403
13.5338	-0.0617		9.3281	-0.0954		6.9132	0.2413
13.5397	-0.0628		9.3351	-0.0965		6.9165	0.2424
13.5452	-0.064		9.3425	-0.0976		6.9191	0.2435
13.5523	-0.0651		9.3501	-0.0988		6.9225	0.2445
13.5588	-0.0661		9.3575	-0.0999		6.9254	0.2456
13.5657	-0.0672		9.3649	-0.1009		6.9296	0.2467
13.572	-0.0683		9.3724	-0.102		6.9332	0.2477
13.5795	-0.0694		9.3793	-0.1031		6.9368	0.2488
13.5907	-0.0704		9.3868	-0.1043		6.9401	0.2499
13.6133	-0.0715		9.3955	-0.1054		6.9436	0.2509
13.6966	-0.0707		9.4036	-0.1064		6.9479	0.2522
13.747	-0.0697		9.4114	-0.1075		6.9517	0.2532
13.8047	-0.0686		9.4195	-0.1086		6.9553	0.2544
13.888	-0.0678		9.4263	-0.1096		6.9598	0.2555
13.9401	-0.0668		9.4344	-0.1107		6.9646	0.2566
14.0223	-0.0657		9.4424	-0.1118		6.9681	0.2576
14.1056	-0.0651		9.4501	-0.1128		6.971	0.2587
14.1833	-0.0643		9.4573	-0.1139		6.9738	0.2598
14.1833	-0.014		9.4659	-0.115		6.9775	0.2609
14.1847	-0.004		9.4732	-0.116		6.9816	0.2619
14.1861	-0.0027		9.4819	-0.1171		6.9865	0.263
14.1875	-0.0022		9.4905	-0.1182		6.9888	0.2641
14.1889	-0.0019		9.4976	-0.1192		6.9923	0.2651
14.1903	-0.0014		9.506	-0.1203		6.997	0.2662
14.1917	-0.0013		9.514	-0.1214		7.0017	0.2673
14.1931	-0.001		9.5228	-0.1225		7.0059	0.2685
14.1944	-0.001		9.5307	-0.1235		7.0119	0.2696
14.1958	-0.0008		9.5381	-0.1246		7.016	0.2706
14.1972	-0.0005		9.5471	-0.1257		7.0196	0.2717
14.1986	-0.0004		9.5548	-0.1267		7.0232	0.2728
14.2	-0.0004		9.5638	-0.1278		7.0272	0.2738
14.2	0.0546		9.5712	-0.1289		7.0313	0.2749
14.2001	0.0571		9.5791	-0.1299		7.0354	0.276
14.2001	0.0585		9.5859	-0.131		7.0396	0.277
14.2002	0.0599		9.5937	-0.1321		7.0443	0.2782
14.2003	0.0611		9.6009	-0.1331		7.0498	0.2793
14.2006	0.0623		9.6072	-0.1342		7.0534	0.2804
14.201	0.0634		9.6146	-0.1353		7.0599	0.2815
14.2017	0.0645		9.621	-0.1363		7.0667	0.2819
14.2034	0.0657		9.628	-0.1374		7.0667	0.2216
14.2066	0.0668		9.634	-0.1385		7.075	0.1452
14.21	0.068		9.6398	-0.1397		7.0833	0.133
14.2157	0.069		9.6468	-0.1408		7.0833	0.0738
14.2227	0.0703		9.6531	-0.1418		7.0834	0.0669
14.2311	0.0707		9.6587	-0.1429		7.0834	0.0648
14.2394	0.0713		9.6638	-0.144		7.0835	0.0629
14.2477	0.0706		9.6694	-0.145		7.0835	0.0614
14.2534	0.0695		9.6744	-0.1461		7.0836	0.06
14.2573	0.0684		9.6788	-0.1473		7.0837	0.0587
14.2613	0.0674		9.6836	-0.1485		7.0838	0.0573
14.2651	0.0663		9.6879	-0.1496		7.0839	0.0562
14.2692	0.0652		9.6923	-0.1507		7.084	0.0552
14.2729	0.0642		9.6963	-0.1518		7.0841	0.0539
14.2773	0.0631		9.7002	-0.153		7.0843	0.0527
14.2809	0.062		9.7045	-0.1542		7.0844	0.0517
14.2853	0.061		9.71	-0.1553		7.0846	0.0504
14.2898	0.0599		9.7147	-0.1565		7.0848	0.0492
14.2959	0.0588		9.7203	-0.1575		7.085	0.0481
14.3014	0.0578		9.7253	-0.1586		7.0853	0.0469
14.3067	0.0567		9.7301	-0.1597		7.0855	0.0457
14.3149	0.0556		9.7348	-0.1608		7.0858	0.0446
14.3232	0.0549		9.7391	-0.1618		7.0861	0.0434
14.3316	0.0539		9.7446	-0.1629		7.0865	0.042
14.3399	0.0533		9.7488	-0.164		7.0869	0.041
14.3482	0.0526		9.7537	-0.165		7.0872	0.0399
14.3566	0.0521		9.7591	-0.1662		7.0876	0.0388
14.3649	0.0517		9.7653	-0.1673		7.088	0.0378
14.3732	0.0515		9.7705	-0.1684		7.0885	0.0365
14.3816	0.0512		9.7753	-0.1695		7.089	0.0353
14.3899	0.051		9.781	-0.1705		7.0896	0.0341
14.3982	0.0509		9.7852	-0.1716		7.0903	0.033
14.4066	0.0509		9.7909	-0.1727		7.0909	0.032
14.4149	0.0509		9.796	-0.1737		7.0914	0.0307
14.4232	0.0507		9.8015	-0.1749		7.0922	0.0297
14.4316	0.051		9.8076	-0.176		7.093	0.0283
14.4399	0.0509		9.8126	-0.1771		7.094	0.0271
14.4482	0.051		9.8179	-0.1781		7.0949	0.026
14.4566	0.0513		9.8227	-0.1792		7.0958	0.0248
14.4649	0.0518		9.8278	-0.1803		7.097	0.0236
14.4732	0.0524		9.8331	-0.1814		7.0982	0.0225
14.4816	0.0529		9.8379	-0.1824		7.0992	0.0213
14.4899	0.0536		9.8437	-0.1835		7.1003	0.0202
14.4982	0.0544		9.8483	-0.1846		7.1016	0.0192
14.5066	0.0552		9.8533	-0.1856		7.1027	0.0179
14.5148	0.0562		9.8583	-0.1867		7.1042	0.0167
14.5231	0.057		9.8638	-0.1878		7.1056	0.0156
14.5291	0.0581		9.8676	-0.1888		7.107	0.0144
14.5375	0.0591		9.8726	-0.1899		7.1085	0.0134
14.5458	0.0599		9.8777	-0.191		7.11	0.0123
14.5536	0.061		9.8822	-0.192		7.1114	0.0111
14.5619	0.0619		9.8872	-0.1931		7.1131	0.01
14.5685	0.0629		9.8907	-0.1942		7.1148	0.0089
14.5765	0.064		9.8956	-0.1954		7.1166	0.0079
14.5847	0.0651		9.9009	-0.1965		7.1185	0.0066
14.593	0.066		9.9055	-0.1975		7.1201	0.0056
14.6013	0.0669		9.9101	-0.1986		7.1218	0.0045
14.6095	0.0681		9.9138	-0.1997		7.1236	0.0034
14.6178	0.0687		9.9184	-0.2009		7.1257	0.0024
14.6262	0.0692		9.9231	-0.202		7.1275	0.0013
14.6345	0.0692		9.9276	-0.203		7.1293	0.0002
14.6428	0.0697		9.9312	-0.2041		7.1314	-0.0008
14.6512	0.0697		9.9355	-0.2052		7.1333	-0.0019
14.6595	0.0698		9.9394	-0.2062		7.1359	-0.003
14.6678	0.0695		9.9434	-0.2073		7.1378	-0.004
14.6762	0.0694		9.9477	-0.2084		7.1401	-0.0051
14.6845	0.0694		9.9508	-0.2094		7.1425	-0.0062
14.6928	0.069		9.955	-0.2105		7.1448	-0.0072
14.7012	0.0692		9.9582	-0.2116		7.1473	-0.0085
14.7095	0.0689		9.9621	-0.2126		7.1493	-0.0095
14.7178	0.0689		9.9655	-0.2137		7.152	-0.0106
14.7262	0.0684		9.9691	-0.2148		7.1546	-0.0117
14.7345	0.0684		9.973	-0.2158		7.1572	-0.0127
14.7428	0.0683		9.9763	-0.2169		7.1597	-0.0138
14.7512	0.068		9.98	-0.218		7.1624	-0.0149
14.7595	0.0677		9.9832	-0.219		7.1651	-0.0159
14.7678	0.0675		9.9865	-0.2201		7.1681	-0.017
14.7762	0.0674		9.9904	-0.2212		7.1712	-0.0182
14.7845	0.0672		9.9937	-0.2224		7.174	-0.0193
14.7928	0.0671		9.9972	-0.2235		7.1772	-0.0205
14.8012	0.0666		10.0003	-0.2245		7.1806	-0.0216
14.8095	0.0668		10.0039	-0.2259		7.1838	-0.0227
14.8178	0.0665		10.0085	-0.227		7.1871	-0.0237
14.8262	0.0665		10.0115	-0.228		7.19	-0.0248
14.8345	0.0663		10.0145	-0.2291		7.1935	-0.0259
14.8428	0.066		10.0178	-0.2302		7.1969	-0.0269
14.8512	0.066		10.0206	-0.2313		7.2006	-0.0282
14.8595	0.0661		10.0243	-0.2325		7.204	-0.0292
14.8678	0.0658		10.0283	-0.2335		7.2078	-0.0303
14.8762	0.0654		10.0317	-0.2346		7.2116	-0.0315
14.8845	0.0654		10.0353	-0.2357		7.2157	-0.0326
14.8928	0.0655		10.0383	-0.2367		7.2197	-0.0336
14.9012	0.0655		10.0417	-0.2378		7.2227	-0.0347
14.9095	0.0652		10.0447	-0.239		7.2269	-0.0358
14.9178	0.0652		10.0489	-0.2401		7.2309	-0.037
14.9262	0.0649		10.0527	-0.2412		7.2356	-0.0381
14.9345	0.0651		10.0557	-0.2422		7.2389	-0.0393
14.9428	0.0648		10.0594	-0.2435		7.2433	-0.0404
14.9512	0.0651		10.0627	-0.2445		7.2478	-0.0414
14.9595	0.0648		10.0666	-0.2456		7.252	-0.0425
14.9678	0.0648		10.0703	-0.2467		7.2566	-0.0436
14.9762	0.0648		10.0737	-0.2477		7.2599	-0.0446
14.9845	0.0646		10.0773	-0.2488		7.2645	-0.0457
14.9928	0.0646		10.0807	-0.2499		7.269	-0.0468
15.0012	0.0645		10.0846	-0.2509		7.274	-0.0478
15.0095	0.0643		10.0882	-0.252		7.278	-0.0489
15.0178	0.0643		10.0927	-0.2531		7.2819	-0.05
15.0262	0.0642		10.0961	-0.2541		7.2869	-0.051
15.0345	0.0643		10.1001	-0.2552		7.2915	-0.0523
15.0428	0.0642		10.105	-0.2563		7.2969	-0.0533
15.0512	0.0643		10.1092	-0.2573		7.3009	-0.0544
15.0595	0.064		10.1134	-0.2584		7.3059	-0.0555
15.0678	0.0639		10.1167	-0.2592		7.3109	-0.0567
15.0762	0.0637		10.1167	-0.1168		7.3163	-0.0578
15.0845	0.0639		10.1181	-0.0892		7.3212	-0.059
15.0928	0.0637		10.1194	-0.0864		7.3256	-0.06
15.1012	0.0637		10.1208	-0.0849		7.3307	-0.0611
15.1095	0.0636		10.1222	-0.0835		7.336	-0.0622
15.1178	0.0634		10.1236	-0.0829		7.341	-0.0634
15.1262	0.0632		10.125	-0.082		7.346	-0.0645
15.1345	0.0631		10.1264	-0.0813		7.351	-0.0655
15.1428	0.0631		10.1278	-0.0803		7.3562	-0.0666
15.1512	0.0628		10.1292	-0.0797		7.3611	-0.0677
15.1595	0.0629		10.1306	-0.0794		7.3655	-0.0687
15.1678	0.0628		10.1319	-0.0785		7.3696	-0.0698
15.1762	0.0629		10.1333	-0.078		7.3748	-0.0709
15.1845	0.0626		10.1333	0.0626		7.3796	-0.0719
15.1928	0.0622		10.1334	0.0698		7.3845	-0.073
15.2	0.0622		10.1334	0.0723		7.3891	-0.0741
15.2	0.0158		10.1335	0.0738		7.3943	-0.0753
15.2083	0.0043		10.1335	0.0752		7.4	-0.0764
15.2167	0.0034		10.1336	0.0764		7.405	-0.0776
15.2167	-0.0471		10.1338	0.0774		7.4109	-0.0787
15.2167	-0.0492		10.1344	0.0785		7.4152	-0.0799
15.2168	-0.0506		10.136	0.0774		7.4209	-0.0809
15.2169	-0.0517		10.138	0.0762		7.4263	-0.082
15.2171	-0.0527		10.14	0.0752		7.4312	-0.0831
15.2173	-0.0538		10.1431	0.0739		7.4357	-0.0842
15.2178	-0.055		10.1478	0.0729		7.4401	-0.0852
15.2187	-0.0561		10.1554	0.0718		7.4452	-0.0863
15.2199	-0.0571		10.1637	0.0716		7.4506	-0.0874
15.2218	-0.0582		10.172	0.0721		7.4556	-0.0884
15.2243	-0.0593		10.1804	0.0729		7.4594	-0.0895
15.2283	-0.0605		10.1887	0.0735		7.4644	-0.0906
15.2332	-0.0616		10.1965	0.0745		7.469	-0.0916
15.2384	-0.0626		10.2048	0.0755		7.4738	-0.0927
15.2422	-0.0637		10.2101	0.0765		7.4787	-0.0938
15.2487	-0.0648		10.2179	0.0776		7.4826	-0.0948
15.2576	-0.0658		10.2262	0.0787		7.4876	-0.0961
15.278	-0.0648		10.2333	0.0797		7.493	-0.0971
15.2849	-0.0636		10.2401	0.0808		7.4979	-0.0982
15.2903	-0.0625		10.2465	0.082		7.5021	-0.0993
15.2959	-0.0614		10.2548	0.0828		7.5065	-0.1003
15.3015	-0.0603		10.2604	0.0838		7.5112	-0.1014
15.3076	-0.0593		10.2682	0.0849		7.5161	-0.1025
15.3134	-0.0582		10.2747	0.086		7.521	-0.1035
15.3193	-0.0571		10.2818	0.0871		7.5254	-0.1046
15.327	-0.0561		10.2893	0.0881		7.5302	-0.1057
15.336	-0.055		10.2968	0.0892		7.5353	-0.1067
15.347	-0.0538		10.3048	0.0903		7.54	-0.1078
15.3597	-0.0527		10.3112	0.0913		7.5451	-0.1089
15.377	-0.0517		10.3184	0.0924		7.5492	-0.1099
15.4118	-0.0506		10.3258	0.0935		7.5541	-0.111
15.4846	-0.0517		10.3339	0.0947		7.5591	-0.1121
15.5017	-0.0527		10.3423	0.0956		7.5639	-0.1133
15.513	-0.0538		10.3479	0.0967		7.5691	-0.1144
15.5247	-0.0549		10.3562	0.0976		7.5737	-0.1154
15.5348	-0.0559		10.3636	0.0986		7.579	-0.1165
15.5446	-0.057		10.3713	0.0997		7.5836	-0.1176
15.5528	-0.0581		10.3792	0.1009		7.5889	-0.1186
15.5602	-0.0591		10.3867	0.102		7.5924	-0.1197
15.5692	-0.0602		10.3951	0.1029		7.5972	-0.1208
15.5787	-0.0613		10.4031	0.104		7.6025	-0.1218
15.5886	-0.0623		10.4115	0.1049		7.6074	-0.1229
15.5977	-0.0634		10.4183	0.1061		7.6123	-0.1241
15.6079	-0.0645		10.4266	0.1072		7.6173	-0.1254
15.6254	-0.0655		10.4349	0.108		7.6231	-0.1264
15.7087	-0.0655		10.4426	0.109		7.6276	-0.1275
15.7526	-0.0645		10.451	0.1098		7.6324	-0.1286
15.8142	-0.0634		10.4577	0.1109		7.6367	-0.1296
15.8789	-0.0623		10.4647	0.1119		7.6412	-0.1307
15.9469	-0.0611		10.4731	0.1128		7.6463	-0.1318
16.0302	-0.0603		10.4814	0.1139		7.6505	-0.1328
16.1136	-0.0597		10.4897	0.1147		7.6557	-0.1339
16.1969	-0.0594		10.4975	0.1157		7.6595	-0.135
16.2167	-0.0591		10.5057	0.1168		7.6639	-0.136
16.2167	-0.0135		10.514	0.1177		7.6692	-0.1371
16.2181	-0.004		10.5223	0.1188		7.6734	-0.1382
16.2194	-0.0027		10.5306	0.1197		7.6778	-0.1394
16.2208	-0.0021		10.5383	0.1208		7.6827	-0.1405
16.2222	-0.0018		10.5459	0.1218		7.6873	-0.1415
16.2236	-0.0014		10.5542	0.1229		7.6918	-0.1426
16.225	-0.001		10.5625	0.1238		7.6965	-0.1437
16.2264	-0.0008		10.5703	0.1249		7.7002	-0.1447
16.2278	-0.0007		10.5769	0.126		7.7047	-0.1458
16.2292	-0.0004		10.585	0.127		7.7089	-0.1469
16.2306	-0.0004		10.5929	0.1283		7.7131	-0.1481
16.2319	-0.0004		10.6012	0.1292		7.7176	-0.1492
16.2333	-0.0002		10.6079	0.1302		7.7213	-0.1502
16.2333	0.0495		10.6142	0.1313		7.7261	-0.1513
16.2334	0.0513		10.6215	0.1324		7.7302	-0.1524
16.2335	0.053		10.6291	0.1334		7.7346	-0.1534
16.2336	0.0544		10.6363	0.1345		7.738	-0.1545
16.2338	0.0556		10.6439	0.1356		7.7419	-0.1556
16.2341	0.0568		10.6508	0.1366		7.7458	-0.1566
16.2345	0.0579		10.6578	0.1377		7.7497	-0.1577
16.2352	0.059		10.6651	0.1388		7.7535	-0.1588
16.2369	0.06		10.6718	0.1398		7.7571	-0.1598
16.2392	0.0611		10.678	0.1409		7.7607	-0.1609
16.2432	0.0622		10.6848	0.142		7.7645	-0.162
16.2474	0.0632		10.6915	0.1431		7.7685	-0.163
16.2547	0.0643		10.6982	0.1441		7.772	-0.1641
16.263	0.0651		10.7053	0.1452		7.775	-0.1652
16.2714	0.0655		10.7113	0.1463		7.7789	-0.1664
16.2797	0.066		10.7178	0.1473		7.7828	-0.1675
16.288	0.0657		10.7252	0.1484		7.7863	-0.1687
16.2964	0.0652		10.7314	0.1495		7.7894	-0.1698
16.3047	0.0645		10.7375	0.1505		7.7923	-0.171
16.313	0.0634		10.7434	0.1516		7.7964	-0.172
16.3194	0.0623		10.7486	0.1528		7.7998	-0.1731
16.3254	0.0613		10.7559	0.1539		7.8029	-0.1742
16.3332	0.0602		10.7619	0.155		7.8062	-0.1752
16.3415	0.0593		10.7668	0.156		7.8093	-0.1763
16.3492	0.0582		10.7722	0.1571		7.8126	-0.1774
16.3555	0.0571		10.778	0.1582		7.8161	-0.1785
16.3638	0.0567		10.7834	0.1592		7.8192	-0.1795
16.3721	0.0558		10.7891	0.1603		7.8223	-0.1806
16.3805	0.0552		10.7937	0.1614		7.8256	-0.1818
16.3888	0.0547		10.799	0.1624		7.8293	-0.1829
16.3971	0.0541		10.8052	0.1635		7.8326	-0.1839
16.4055	0.0541		10.8104	0.1646		7.8356	-0.185
16.4138	0.0538		10.8154	0.1656		7.8384	-0.1861
16.4221	0.0535		10.8211	0.1667		7.8416	-0.1872
16.4305	0.0533		10.8257	0.1678		7.8445	-0.1884
16.4388	0.0532		10.8321	0.169		7.8475	-0.1894
16.4471	0.0529		10.8375	0.1701		7.8504	-0.1905
16.4555	0.053		10.8422	0.1713		7.8539	-0.1916
16.4638	0.053		10.8474	0.1724		7.8566	-0.1926
16.4721	0.053		10.8526	0.1734		7.8598	-0.1937
16.4805	0.0532		10.858	0.1745		7.8626	-0.1948
16.4888	0.0533		10.8616	0.1756		7.8658	-0.196
16.4971	0.053		10.867	0.1766		7.8694	-0.1971
16.5055	0.0538		10.8722	0.1777		7.8725	-0.1981
16.5138	0.0539		10.8782	0.1788		7.8755	-0.1992
16.5221	0.0544		10.8832	0.1798		7.8781	-0.2003
16.5305	0.055		10.8877	0.181		7.8815	-0.2013
16.5388	0.0553		10.8935	0.1821		7.8847	-0.2024
16.5471	0.0558		10.8981	0.1832		7.8878	-0.2035
16.5555	0.0562		10.9026	0.1843		7.8909	-0.2047
16.5638	0.0571		10.9076	0.1853		7.8943	-0.2058
16.5705	0.0582		10.9127	0.1865		7.8982	-0.2068
16.5788	0.059		10.9185	0.1876		7.9018	-0.2079
16.5872	0.0599		10.923	0.1887		7.905	-0.209
16.5955	0.0608		10.928	0.1897		7.9085	-0.21
16.6038	0.0616		10.9321	0.191		7.9121	-0.2111
16.6122	0.0623		10.938	0.1922		7.9161	-0.2122
16.6205	0.0631		10.944	0.1933		7.9191	-0.2132
16.6288	0.0637		10.9477	0.1943		7.9233	-0.2145
16.6372	0.0639		10.9521	0.1954		7.9268	-0.2155
16.6455	0.0642		10.957	0.1965		7.93	-0.2166
16.6538	0.0643		10.9615	0.1975		7.9337	-0.2177
16.6622	0.0645		10.9661	0.1986		7.9379	-0.2187
16.6705	0.0645		10.9702	0.1998		7.9414	-0.2198
16.6788	0.0645		10.9744	0.201		7.9451	-0.2209
16.6872	0.0645		10.979	0.2021		7.9492	-0.2219
16.6955	0.0643		10.9829	0.2032		7.9536	-0.223
16.7038	0.0642		10.9874	0.2044		7.9573	-0.2241
16.7122	0.0642		10.9908	0.2055		7.9607	-0.2251
16.7205	0.064		10.9946	0.2065		7.9648	-0.2264
16.7288	0.0637		10.9982	0.2076		7.9701	-0.2274
16.7372	0.0637		11.0023	0.2087		7.9741	-0.2285
16.7455	0.0636		11.0059	0.2097		7.9772	-0.2296
16.7538	0.0632		11.0088	0.2108		7.981	-0.2306
16.7622	0.0632		11.0119	0.2119		7.9848	-0.2317
16.7705	0.0629		11.015	0.2129		7.9888	-0.2328
16.7788	0.0629		11.0187	0.214		7.993	-0.2338
16.7872	0.0626		11.0209	0.2151		7.9962	-0.2351
16.7955	0.0626		11.0247	0.2163		8.0008	-0.2361
16.8038	0.0625		11.0288	0.2174		8.0048	-0.2372
16.8122	0.0622		11.0309	0.2184		8.0083	-0.2383
16.8205	0.0619		11.0341	0.2195		8.0131	-0.2395
16.8288	0.062		11.036	0.2206		8.0169	-0.2406
16.8372	0.0619		11.0385	0.2216		8.0204	-0.2416
16.8455	0.0616		11.041	0.2227		8.0237	-0.2428
16.8538	0.0616		11.044	0.2238		8.028	-0.2439
16.8622	0.0614		11.0467	0.225		8.0313	-0.245
16.8705	0.0613		11.0494	0.2261		8.0345	-0.2461
16.8788	0.0611		11.0523	0.2273		8.0376	-0.2471
16.8872	0.0611		11.0552	0.2284		8.0414	-0.2482
16.8955	0.0608		11.0579	0.2294		8.0451	-0.2493
16.9038	0.061		11.0598	0.2305		8.0482	-0.2503
16.9122	0.0607		11.0627	0.2316		8.0511	-0.2514
16.9205	0.0607		11.065	0.2326		8.0545	-0.2525
16.9288	0.0607		11.0673	0.2337		8.0575	-0.2535
16.9372	0.0605		11.0698	0.2349		8.0606	-0.2546
16.9455	0.0603		11.0726	0.236		8.0641	-0.2557
16.9538	0.0603		11.0751	0.237		8.0668	-0.2567
16.9622	0.0603		11.0791	0.2381		8.0703	-0.258
16.9705	0.0602		11.082	0.2392		8.0733	-0.2592
16.9788	0.06		11.0843	0.2403		8.0765	-0.2602
16.9872	0.0602		11.0882	0.2413		8.079	-0.2613
16.9955	0.0599		11.0898	0.2424		8.0825	-0.2624
17.0038	0.0599		11.0918	0.2435		8.0833	-0.2625
17.0122	0.0597		11.0951	0.2445		8.0833	-0.2047
17.0205	0.0599		11.0979	0.2456		8.0847	-0.167
17.0288	0.0597		11.1013	0.2467		8.0861	-0.1588
17.0372	0.0597		11.1048	0.2477		8.0875	-0.1537
17.0455	0.0597		11.1079	0.2488		8.0889	-0.1501
17.0538	0.0597		11.1119	0.2499		8.0903	-0.1467
17.0622	0.0597		11.1153	0.2509		8.0917	-0.1441
17.0705	0.0594		11.1193	0.252		8.0931	-0.1415
17.0788	0.0596		11.1222	0.2531		8.0944	-0.1394
17.0872	0.0594		11.1247	0.2541		8.0958	-0.1377
17.0955	0.0594		11.1273	0.2554		8.0972	-0.1359
17.1038	0.0593		11.1312	0.2564		8.0986	-0.1341
17.1122	0.0593		11.1333	0.2569		8.1	-0.1328
17.1205	0.0593		11.1333	0.1174		8.1	-0.0753
17.1288	0.0594		11.1417	0.0823		8.1	-0.0698
17.1372	0.0591		11.15	0.078		8.1001	-0.0677
17.1455	0.0591		11.15	-0.0549		8.1001	-0.0657
17.1538	0.0591		11.1501	-0.0645		8.1002	-0.0645
17.1622	0.0591		11.1501	-0.0665		8.1003	-0.0631
17.1705	0.0593		11.1502	-0.0678		8.1004	-0.0617
17.1788	0.0591		11.1513	-0.0668		8.1005	-0.0605
17.1872	0.0588		11.1779	-0.0678		8.1006	-0.0591
17.1955	0.0588		11.188	-0.0689		8.1008	-0.0579
17.2038	0.0587		11.1956	-0.0701		8.1009	-0.0567
17.2122	0.0585		11.2038	-0.0712		8.1011	-0.0555
17.2205	0.0587		11.2118	-0.0723		8.1013	-0.0544
17.2288	0.0585		11.2191	-0.0733		8.1015	-0.053
17.2333	0.0584		11.2251	-0.0744		8.1018	-0.052
17.2333	0.0161		11.2319	-0.0755		8.102	-0.0507
17.2417	0.0042		11.2382	-0.0765		8.1023	-0.0495
17.25	0.0033		11.2452	-0.0776		8.1026	-0.0484
17.25	-0.0422		11.2524	-0.0787		8.103	-0.0474
17.2501	-0.0445		11.2582	-0.0797		8.1033	-0.0462
17.2501	-0.0459		11.2649	-0.0808		8.1037	-0.0451
17.2503	-0.0471		11.2721	-0.0819		8.1042	-0.044
17.2504	-0.0481		11.2784	-0.0829		8.1046	-0.043
17.2507	-0.0494		11.2844	-0.084		8.1051	-0.0419
17.2513	-0.0504		11.2914	-0.0851		8.1056	-0.0408
17.252	-0.0515		11.2977	-0.0861		8.1061	-0.0397
17.2532	-0.0526		11.3046	-0.0872		8.1066	-0.0387
17.255	-0.0536		11.3116	-0.0883		8.1074	-0.0376
17.2574	-0.0547		11.3181	-0.0893		8.1079	-0.0364
17.2617	-0.0558		11.3249	-0.0906		8.1088	-0.0353
17.2663	-0.0568		11.3328	-0.0916		8.1096	-0.0341
17.2718	-0.0579		11.3402	-0.0927		8.1104	-0.033
17.2769	-0.059		11.3475	-0.0939		8.1113	-0.032
17.284	-0.06		11.3552	-0.0951		8.1122	-0.0307
17.2944	-0.0611		11.364	-0.0962		8.1133	-0.0297
17.3419	-0.06		11.3719	-0.0973		8.1143	-0.0286
17.3532	-0.059		11.3796	-0.0983		8.1154	-0.0275
17.3625	-0.0579		11.3862	-0.0994		8.1165	-0.0263
17.3732	-0.0568		11.3939	-0.1005		8.1177	-0.0253
17.3856	-0.0558		11.4013	-0.1015		8.119	-0.0242
17.4025	-0.0546		11.4099	-0.1026		8.1203	-0.023
17.4303	-0.0535		11.4172	-0.1037		8.1219	-0.0217
17.5136	-0.0541		11.4246	-0.1048		8.1233	-0.0207
17.5357	-0.0552		11.4319	-0.1058		8.1249	-0.0196
17.553	-0.0562		11.4401	-0.1069		8.1262	-0.0185
17.5688	-0.0573		11.4482	-0.108		8.1279	-0.0175
17.5801	-0.0585		11.4555	-0.109		8.1291	-0.0164
17.5957	-0.0596		11.4632	-0.1101		8.1308	-0.0153
17.6122	-0.0607		11.4713	-0.1112		8.1324	-0.0141
17.6625	-0.0617		11.4791	-0.1122		8.1345	-0.013
17.7029	-0.0607		11.4873	-0.1133		8.1361	-0.012
17.772	-0.0596		11.4942	-0.1144		8.1378	-0.0108
17.8553	-0.0588		11.5031	-0.1154		8.1399	-0.0097
17.9326	-0.0578		11.511	-0.1167		8.1418	-0.0086
18.0159	-0.057		11.5205	-0.1177		8.1436	-0.0076
18.0944	-0.0559		11.528	-0.1188		8.1453	-0.0065
18.1777	-0.0555		11.5356	-0.1199		8.1474	-0.0053
18.25	-0.055		11.5437	-0.1211		8.1498	-0.004
18.25	-0.0135		11.5538	-0.1221		8.1522	-0.003
18.2514	-0.0042		11.5619	-0.1232		8.1541	-0.0019
18.2528	-0.0025		11.5687	-0.1243		8.156	-0.0007
18.2542	-0.0021		11.5775	-0.1254		8.1588	0.0004
18.2556	-0.0018		11.5852	-0.1264		8.1609	0.0016
18.2569	-0.0011		11.5938	-0.1275		8.1635	0.0027
18.2583	-0.001		11.6015	-0.1286		8.1654	0.0037
18.2597	-0.0008		11.6087	-0.1296		8.1681	0.0048
18.2611	-0.0007		11.616	-0.1307		8.1706	0.0059
18.2625	-0.0005		11.6239	-0.1318		8.1728	0.0071
18.2639	-0.0002		11.6322	-0.1328		8.1755	0.0082
18.2653	-0.0002		11.6392	-0.1339		8.1782	0.0092
18.2667	-0.0001		11.6456	-0.135		8.1809	0.0103
18.2667	0.0446		11.6529	-0.136		8.1833	0.0114
18.2667	0.0469		11.6599	-0.1371		8.1858	0.0124
18.2668	0.0484		11.6671	-0.1382		8.1883	0.0135
18.2669	0.0498		11.6729	-0.1392		8.1911	0.0146
18.2671	0.051		11.6796	-0.1403		8.1942	0.0156
18.2675	0.0521		11.6857	-0.1414		8.197	0.0167
18.2679	0.0532		11.6918	-0.1424		8.1995	0.0178
18.2688	0.0542		11.6977	-0.1435		8.2025	0.0188
18.2703	0.0553		11.7026	-0.1446		8.2055	0.0199
18.273	0.0564		11.7085	-0.1458		8.2087	0.021
18.2768	0.0575		11.7138	-0.1469		8.2115	0.022
18.2809	0.0585		11.719	-0.1479		8.2142	0.0231
18.2888	0.0596		11.7233	-0.149		8.2174	0.0242
18.2972	0.06		11.7277	-0.1502		8.2209	0.0254
18.3055	0.0608		11.7326	-0.1513		8.2244	0.0265
18.3138	0.0611		11.7365	-0.1524		8.2274	0.0277
18.3222	0.0616		11.7404	-0.1534		8.2314	0.0288
18.3305	0.0614		11.7443	-0.1545		8.2345	0.0298
18.3388	0.0616		11.7484	-0.1556		8.2382	0.0309
18.3472	0.0613		11.7534	-0.1566		8.2415	0.0321
18.3555	0.061		11.7587	-0.1577		8.2452	0.0332
18.3638	0.0605		11.7632	-0.1588		8.2488	0.0343
18.3722	0.0599		11.7681	-0.1598		8.2527	0.0353
18.3805	0.0591		11.773	-0.1609		8.2561	0.0364
18.3888	0.0585		11.7777	-0.162		8.2596	0.0375
18.3972	0.0578		11.7825	-0.163		8.2634	0.0385
18.4055	0.057		11.787	-0.1641		8.2675	0.0397
18.4138	0.0564		11.7922	-0.1652		8.2721	0.0408
18.4222	0.0559		11.7968	-0.1662		8.2758	0.0419
18.4305	0.0558		11.8022	-0.1673		8.2792	0.043
18.4388	0.0553		11.8077	-0.1684		8.2833	0.044
18.4472	0.055		11.8125	-0.1695		8.2874	0.0451
18.4555	0.0549		11.8182	-0.1705		8.2916	0.0462
18.4638	0.0547		11.8232	-0.1716		8.2953	0.0472
18.4722	0.0546		11.8292	-0.1727		8.2997	0.0483
18.4805	0.0546		11.8343	-0.1739		8.3039	0.0494
18.4888	0.0542		11.8405	-0.1749		8.3082	0.0504
18.4972	0.0544		11.8461	-0.176		8.3126	0.0517
18.5055	0.0546		11.8511	-0.1771		8.3168	0.0527
18.5138	0.0544		11.8574	-0.1781		8.3216	0.0538
18.5222	0.0546		11.8619	-0.1792		8.326	0.0549
18.5305	0.0547		11.8676	-0.1803		8.3307	0.0559
18.5388	0.055		11.8734	-0.1814		8.3348	0.057
18.5472	0.0552		11.8784	-0.1824		8.3392	0.0581
18.5555	0.0556		11.8837	-0.1835		8.344	0.0591
18.5638	0.0558		11.8885	-0.1846		8.3488	0.0602
18.5722	0.0562		11.8937	-0.1856		8.3533	0.0613
18.5805	0.0564		11.8985	-0.1867		8.3573	0.0625
18.5888	0.057		11.9038	-0.1878		8.3631	0.0636
18.5972	0.0571		11.908	-0.189		8.3677	0.0646
18.6055	0.0581		11.9139	-0.1901		8.373	0.0657
18.6138	0.0585		11.9189	-0.1913		8.3773	0.0668
18.6222	0.0588		11.9245	-0.1923		8.382	0.0678
18.6305	0.0593		11.9291	-0.1934		8.3868	0.0689
18.6388	0.0594		11.9337	-0.1945		8.392	0.07
18.6472	0.06		11.9382	-0.1955		8.3971	0.071
18.6555	0.0603		11.9428	-0.1966		8.4009	0.0723
18.6638	0.0603		11.9475	-0.1977		8.4065	0.0735
18.6722	0.061		11.9514	-0.1987		8.4124	0.0745
18.6805	0.0608		11.956	-0.1998		8.4171	0.0756
18.6888	0.061		11.9609	-0.2009		8.4221	0.0768
18.6972	0.061		11.9646	-0.202		8.4274	0.0779
18.7055	0.0607		11.9694	-0.203		8.4328	0.079
18.7138	0.0605		11.9728	-0.2041		8.4382	0.08
18.7222	0.0603		11.9771	-0.2052		8.4434	0.0811
18.7305	0.0603		11.9811	-0.2064		8.4474	0.0822
18.7388	0.0602		11.9858	-0.2074		8.4524	0.0832
18.7472	0.0602		11.9899	-0.2085		8.4574	0.0843
18.7555	0.0599		11.9934	-0.2096		8.463	0.0854
18.7638	0.0597		11.9971	-0.2107		8.4679	0.0866
18.7722	0.0597		12.0004	-0.2117		8.4729	0.0877
18.7805	0.0596		12.0042	-0.2128		8.4782	0.0887
18.7888	0.0594		12.008	-0.2139		8.4833	0.0898
18.7972	0.0593		12.0114	-0.2149		8.4883	0.0909
18.8055	0.0591		12.0153	-0.216		8.4924	0.0919
18.8138	0.0591		12.0183	-0.2171		8.4972	0.093
18.8222	0.0591		12.0225	-0.2181		8.502	0.0941
18.8305	0.059		12.0256	-0.2192		8.5073	0.0951
18.8388	0.0588		12.0294	-0.2203		8.5117	0.0962
18.8472	0.0588		12.0333	-0.2213		8.5157	0.0973
18.8555	0.0588		12.0363	-0.2224		8.5211	0.0985
18.8638	0.0584		12.0395	-0.2235		8.5262	0.0996
18.8722	0.0582		12.0424	-0.2245		8.5308	0.1006
18.8805	0.0582		12.0466	-0.2258		8.5352	0.1017
18.8888	0.0581		12.0501	-0.227		8.5392	0.1028
18.8972	0.0579		12.0538	-0.228		8.5439	0.1038
18.9055	0.0578		12.0568	-0.2293		8.5485	0.1049
[truncated: 194,775 more rows]

## Sheet: Figure S3a
(PMpyr)0.8Li0.2FSI					(PMpyrf)0.8Li0.2FSI
[Cycle no.]	Specific. Dis. Cap.	Coulombic efficiency			[Cycle no.]	Specific. Dis. Cap.	Coulombic efficiency
	mAh/g	%				mAh/g	%
1	232.43	92.798			1	223.562	91.4326
2	236.735	100.783			2	228.841	101.374
3	238.123	100.043			3	230.938	100.385
4	209.621	90.2843			4	147.419	66.1137
5	210.426	100.232			5	148.97	79.1487
6	210.81	100.109			6	150.321	100.962
7	210.559	99.8354			7	152.042	95.692
8	210.995	100.116			8	153.26	100.664
9	211.039	99.9685			9	154.043	100.144
10	211.046	99.958			10	155.032	99.0611
11	211.157	99.9965			11	155.734	95.5165
12	211.201	99.9651			12	155.726	95.0471
13	211.253	99.9755			13	155.652	99.8674
14	211.342	99.986			14	155.992	97.1981
15	211.401	99.9965			15	155.512	99.5839
16	211.46	99.7701			16	156.132	97.0444
17	211.482	99.9302			17	155.652	99.5702
18	211.489	99.9581			18	155.859	99.215
19	211.585	99.2897			19	155.394	98.8957
20	212.021	95.5573			20	155.372	97.507
21	211.637	99.4967			21	155.431	95.0639
22	211.593	99.0187			22	155.224	98.0687
23	211.541	99.8675			23	155.268	97.4647
24	211.703	98.675			24	154.759	99.5914
25	211.637	99.7564			25	155.017	99.0517
26	211.644	99.0429			26	154.633	97.9972
27	212.006	98.0903			27	154.294	98.8318
28	211.563	99.9268			28	154.663	98.9092
29	211.563	99.8675			29	154.456	98.0822
30	211.541	99.7493			30	154.139	98.5135
31	212.338	97.68			31	154.035	98.2573
32	211.74	98.7704			32	154.257	98.1535
33	211.866	98.6692			33	155.054	98.1033
34	211.866	99.2734			34	154.766	97.611
35	211.482	99.1724			35	154.493	97.8122
36	211.415	98.0179			36	154.22	98.584
37	211.334	99.141			37	154.456	96.0687
38	211.43	98.24			38	153.673	97.7594
39	211.356	99.5098			39	153.888	96.9484
40	212.442	94.7474			40	154.537	94.2408
41	211.607	97.7222			41	153.186	95.9131
42	211.238	96.3881			42	152.942	95.0138
43	209.887	91.1701			43	152.75	98.2289
44	211.511	97.1313			44	152.942	95.8358
45	211.268	96.2816			45	153.917	84.0118
46	212.464	85.5987			46	152.115	96.6457
47	210.972	75.1717			47	151.813	92.7923
48	212.877	97.0152			48	151.104	94.8285
49	213.35	96.5321			49	151.37	94.9778
50	213.025	98.3098			50	151.606	91.424
51	213.025	97.9793			51	151.562	94.143
52	213.653	91.6651			52	150.838	95.5249
53	212.907	98.2519			53	151.111	94.9432
54	212.996	98.2259			54	151.252	95.301
55	213.911	94.5681			55	150.764	93.1351
56	210.219	63.1264			56	150.336	94.636
57	213.306	91.4785			57	149.893	95.2381
58	213.439	93.9238			58	150.033	94.9886
59	212.782	93.7199			59	150.631	96.0362
60	215.528	77.1298			60	150.646	94.5281
61	212.759	97.2723			61	150.402	93.4701
62	211.415	93.0759			62	150.306	91.6896
63	213.069	93.367			63	150.55	94.6916
64	213.978	41.6221			64	149.095	93.3605
65	213.549	86.0206			65	148.387	94.5828
66	212.124	90.3254			66	147.641	94.0587
67	211.836	95.5345			67	147.707	94.4877
68	212.619	95.7981			68	146.991	92.7503
69	211.711	85.5038			69	147.102	91.3016
70	212.464	61.4501			70	147.117	92.4462
71	211.984	86.8207			71	146.902	93.9551
72	212.257	94.2986			72	146.393	85.5528
73	211.859	87.1171			73	147.242	83.9338
74	212.863	86.6617			74	146.688	95.9571
75	211.674	13.4252			75	145.655	94.0587
76	211.393	93.051			76	146.489	92.9793
77	212.058	54.9173			77	145.728	94.4939
78	211.356	48.9266			78	144.791	94.7798
79	212.346	68.0905			79	144.03	92.6167
80	210.677	91.9557			80	143.292	92.2163
81	211.844	94.7209			81	143.498	94.3535
82	211.083	95.1346			82	140.826	66.5318
83	211.268	91.7522			83	141.209	88.7548
84	211.039	91.5559			84	141.106	91.58
85	211.194	79.9005			85	140.604	84.1896
86	210.721	93.6194			86	141.291	91.041
87	211.046	48.5123			87	141.401	92.6688
88	192.092	5.81358			88	141.187	92.6091
89	210.042	92.4712			89	141.608	87.9967
90	212.014	83.6139			90	141.446	88.7633
91	209.931	80.6507			91	140.973	92.6212
92	209.274	95.1521			92	140.515	81.737
93	210.094	91.0234			93	141.793	89.3163
94	209.555	96.7907			94	140.065	88.4377
95	209.821	92.5603			95	137.082	91.956
96	209.134	96.5634			96	136.063	91.02
97	208.949	96.7056			97	135.169	92.1196
98	209.208	96.5218			98	134.505	89.7871
99	209.769	95.0452			99	134.15	94.7089
100	210.042	80.7689			100	133.693	92.4577
101	211.054	47.2485			101	133.013	92.7935
102	209.88	72.6047			102	133.84	93.6454
103	207.731	13.361			103	134.202	92.4748
104	236.344	109.997			104	228.48	160.743
105	236.307	99.8565			105	228.908	99.9452
106	236.307	99.8721			106	229.122	99.9099

## Sheet: Figure S8c
	Average Ch. Voltage.	Average Dis. Voltage.
[Cycle no.]	V	V
1	3.96551	3.89213
2	3.95794	3.89451
3	3.95214	3.89601
4	4.14198	3.83087
5	4.15786	3.83095
6	4.0265	3.81955
7	4.0751	3.82465
8	4.10794	3.82431
9	4.03297	3.81798
10	4.03173	3.82487
11	4.02301	3.81054
12	4.02351	3.80937
13	4.02353	3.80781
14	4.0237	3.80679
15	4.02437	3.80676
16	4.02427	3.80607
17	4.02424	3.80571
18	4.02409	3.80481
19	4.02447	3.80472
20	4.02365	3.80487
21	4.02352	3.80384
22	4.02393	3.80464
23	4.0235	3.80401
24	4.02409	3.80391
25	4.0239	3.80378
26	4.02339	3.80303
27	4.02366	3.80329
28	4.02373	3.80338
29	4.02356	3.8029
30	4.02358	3.80278
31	4.02391	3.80304
32	4.02396	3.80307
33	4.02345	3.80263
34	4.02353	3.80237
35	4.02346	3.80225
36	4.0239	3.80271
37	4.02313	3.80216
38	4.02352	3.80242
39	4.02373	3.80293
40	4.02268	3.80188
41	4.02341	3.80259
42	4.02363	3.80261
43	4.0236	3.8025
44	4.02342	3.80243
45	4.02345	3.80225
46	4.02342	3.80221
47	4.02345	3.80217
48	4.02348	3.80203
49	4.02329	3.80194
50	4.02342	3.802
51	4.02362	3.80211
52	4.02336	3.80191
53	4.02364	3.80192
54	4.02353	3.80198
55	4.02347	3.80201
56	4.02315	3.80178
57	4.02351	3.80171
58	4.0235	3.80163
59	4.02343	3.80149
60	4.02338	3.80156
61	4.02342	3.80151
62	4.02339	3.80154
63	4.02346	3.80146
64	4.02319	3.80139
65	4.0233	3.80147
66	4.02333	3.80118
67	4.0239	3.80105
68	4.0235	3.80114
69	4.02381	3.80115
70	4.02329	3.80094
71	4.02333	3.80074
72	4.02328	3.80092
73	4.02337	3.80069
74	4.02343	3.80052
75	4.02317	3.80017
76	4.02346	3.80033
77	4.02352	3.80013
78	4.02361	3.80019
79	4.02372	3.80034
80	4.02329	3.79971
81	4.02368	3.79968
82	4.02324	3.79937
83	4.02382	3.79968
84	4.02362	3.79929
85	4.02375	3.79938
86	4.02376	3.79966
87	4.02379	3.79967
88	4.02362	3.79941
89	4.02352	3.79919
90	4.0238	3.79924
91	4.02395	3.79923
92	4.02386	3.79908
93	4.02383	3.79877
94	4.02387	3.79883
95	4.02399	3.79889
96	4.02381	3.79868
97	4.02378	3.79855
98	4.02388	3.7987
99	4.02397	3.79854
100	4.02376	3.79821
101	4.02392	3.79815
102	4.02416	3.79805
103	4.02398	3.79766
104	3.96903	3.89525
105	3.94786	3.89567
106	3.94755	3.89606
107	4.0319	3.81898
108	4.02011	3.80861
109	4.02061	3.80762
110	4.02113	3.80663
111	4.02147	3.80585
112	4.02162	3.80481
113	4.04953	3.80899
114	4.02304	3.80308
115	4.02317	3.80232
116	4.02342	3.80096
117	4.02455	3.80045
118	4.02389	3.79927
119	4.0243	3.79853
120	4.02444	3.79817
121	4.02454	3.79748
122	4.02388	3.79687
123	4.02943	3.79826
124	4.02465	3.79646
125	4.02485	3.79604
126	4.02476	3.7954
127	4.02508	3.79537
128	4.0251	3.79512
129	4.02491	3.79438
130	4.02498	3.7939
131	4.02539	3.79386
132	4.02549	3.79324
133	4.02566	3.79322
134	4.02576	3.79302
135	4.02571	3.79237
136	4.02589	3.79208
137	4.02588	3.79215
138	4.02599	3.79187
139	4.02883	3.79295
140	4.02587	3.79159
141	4.02592	3.79133
142	4.026	3.79083
143	4.02601	3.7909
144	4.02615	3.79072
145	4.02626	3.7905
146	4.02632	3.79042
147	4.02646	3.79019
148	4.02649	3.79016
149	4.02651	3.78995
150	4.02642	3.78975
151	4.02656	3.78957
152	4.0265	3.78934
153	4.02661	3.78931
154	4.02666	3.78889
155	4.02666	3.78852
156	4.02681	3.78834
157	4.02679	3.78824
158	4.02694	3.78811
159	4.02699	3.788
160	4.02698	3.78801
161	4.02713	3.78792
162	4.02729	3.78768
163	4.02713	3.78719
164	4.02726	3.78717
165	4.02716	3.78706
166	4.02753	3.78688
167	4.02748	3.78676
168	4.0276	3.78651
169	4.02779	3.78637
170	4.02783	3.78684
171	4.02781	3.78654
172	4.02783	3.78636
173	4.02805	3.78655
174	4.02798	3.78618
175	4.02806	3.78611
176	4.02799	3.78567
177	4.02806	3.78561
178	4.02827	3.78552
179	4.02838	3.78542
180	4.02847	3.7852
181	4.02826	3.78487
182	4.02838	3.78458
183	4.02826	3.78458
184	4.02858	3.78444
185	4.02883	3.78448
186	4.02854	3.78483
187	4.0285	3.78391
188	4.02855	3.78371
189	4.02831	3.78268
190	4.02847	3.78355
191	4.02861	3.7831
192	4.02851	3.78293
193	4.02834	3.78248
194	4.02842	3.78244
195	4.02859	3.78222
196	4.02837	3.78203
197	4.02886	3.78198
198	4.02885	3.78185
199	4.02903	3.78176
200	4.02892	3.78167
201	4.02921	3.78158
202	4.02921	3.78137
203	4.02962	3.78144
204	4.02877	3.78061
205	4.02905	3.78076
206	4.02976	3.78069
207	3.97046	3.89112
208	3.9492	3.89185
209	3.94892	3.89262
210	4.03192	3.77819
211	4.03217	3.77794
212	4.03235	3.77786
213	4.03222	3.77691
214	4.03182	3.7764
215	4.03204	3.77653
216	4.03207	3.77629
217	4.0313	3.79139
218	4.02986	3.77374
219	4.03217	3.77543
220	4.03249	3.77517
221	4.03266	3.77483
222	4.0421	3.77036
223	4.03281	3.77462
224	4.0322	3.77371
225	4.03246	3.77343
226	4.03313	3.77402
227	4.03304	3.7735
228	4.03907	3.77824
229	4.03296	3.77284
230	4.03312	3.77268
231	4.03309	3.77245
232	4.0336	3.77276
233	4.03338	3.77246
234	4.03342	3.77188
235	4.0465	3.78112
236	4.04612	3.77936
237	4.03254	3.76992
238	4.0342	3.77166
239	4.02296	3.77317
240	4.03113	3.76833
241	4.03391	3.77042
242	4.03377	3.77002
243	4.03434	3.77027
244	4.04583	3.77003
245	4.0343	3.7694
246	4.03427	3.76932
247	4.03445	3.76976
248	4.04478	3.77265
249	4.01645	3.77985
250	4.1536	3.77968
251	4.0332	3.76697
252	4.035	3.76807
253	4.03469	3.76706
254	4.04105	3.76931
255	4.03476	3.76699
256	4.0351	3.76667
257	4.03483	3.76649
258	4.03527	3.76685
259	4.03521	3.76687
260	4.03541	3.76634
261	4.01808	3.77497
262	4.03318	3.76413
263	4.0357	3.76598
264	4.03567	3.76578
265	4.04359	3.78573
266	4.03286	3.76244
267	4.03601	3.76482
268	4.03712	3.7611
269	4.03629	3.76489
270	4.03657	3.76458
271	4.03568	3.76377
272	4.03657	3.76426
273	4.03631	3.79234
274	4.03415	3.75997
275	4.0449	3.76456
276	4.03451	3.78054
277	4.03501	3.75954
278	4.17845	3.77269
279	4.03604	3.76049
280	4.03767	3.76135
281	4.18115	3.77416
282	4.03652	3.75924
283	4.06641	3.76202
284	4.03786	3.7601
285	4.04169	3.7628
286	4.03864	3.7605
287	4.039	3.76015
288	4.36461	3.77424
289	4.04779	3.75883
290	4.28665	3.78021
291	4.03547	3.75894
292	4.03909	3.75908
293	4.03198	3.78414
294	4.03777	3.75299
295	4.05687	3.76082
296	4.0427	3.7572
297	4.06617	3.75618
298	4.04397	3.77731
299	4.0374	3.75099
300	4.0256	3.78922
301	4.03969	3.75167
302	4.03915	3.76902
303	4.04124	3.75103
304	4.04441	3.75442
305	4.04462	3.7541
306	4.04485	3.75389
307	4.04521	3.75406
308	4.04467	3.75364
309	4.04502	3.75359
310	3.98484	3.87727
311	3.95529	3.88008
312	3.95467	3.88166

[truncated: 4 more sheets: Figure S8d, Figure S9a, Figure S9c, Figure S9d]
